# Supplementary material for: A machine learning study on superlattice electron blocking layer design for AlGaN deep ultraviolet light-emitting diodes using the stacked XGBoost/LightGBM algorithm
Source: Royal Society of Chemistry journal article supplement (doi:10.1039/d2tc02335k), 2022-01-01

## **Machine learning study on superlattice electron blocking layer design for AlGaIn deep ultraviolet light-emitting diodes using the stacked XGBoost/LightGBM algorithm**

Rongyu Lin,<sup>a,†</sup> Zhiyuan Liu,<sup>a,†</sup> Peng Han,<sup>b</sup> Ronghui Lin,<sup>a</sup> Yi Lu,<sup>a</sup> Haicheng Cao,<sup>a</sup> Xiao Tang,<sup>a</sup> Chuanju Wang,<sup>a</sup> Vishal Khandelwal,<sup>a</sup> Xiangliang Zhang,<sup>\*b,c</sup> and Xiaohang Li <sup>\*a</sup>

a. Advanced Semiconductor Laboratory, Computer, Electrical and Mathematical Sciences and Engineering Division, King Abdullah University of Science and Technology (KAUST), Thuwal 23955-6900, Kingdom of Saudi Arabia.

b. Laboratory Machine, Intelligence and Knowledge Engineering (MINE), Computer, Electrical and Mathematical Sciences and Engineering Division, King Abdullah University of Science and Technology (KAUST), Thuwal 23955-6900, Kingdom of Saudi Arabia.

c. Department of Computer Science and Engineering, University of Notre Dame, Notre Dame, IN 46556, USA

† These authors contributed equally.

\*Corresponding author.

\* xzhang33@nd.edu and [xiaohang.li@kaust.edu.sa](mailto:xiaohang.li@kaust.edu.sa)

**S1. Internal quantum efficiency (IQE) predictions from stacked XGBoost/LightGBM model of superlattice (SL) electron blocking layer (EBL) with different composition combinations under the band offset ratio = 0.55.**

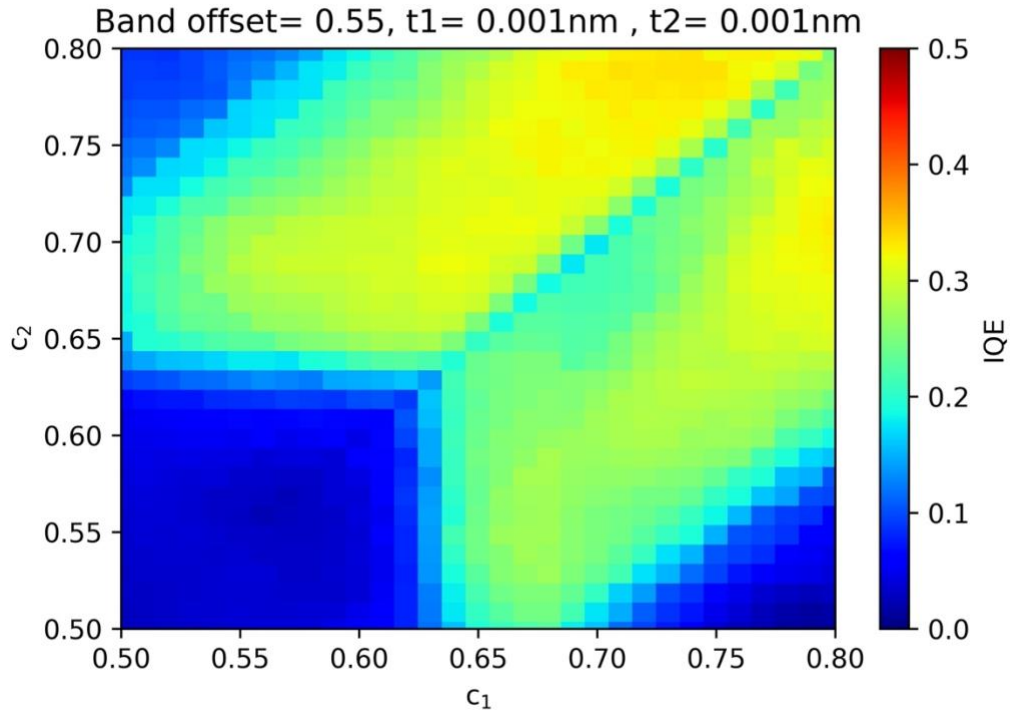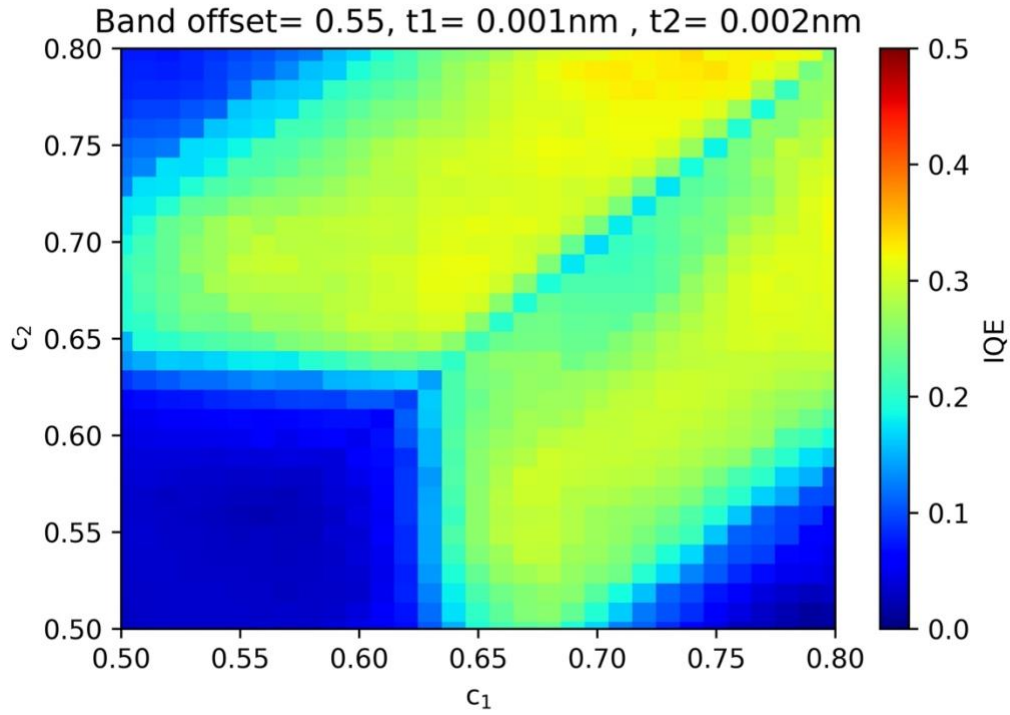

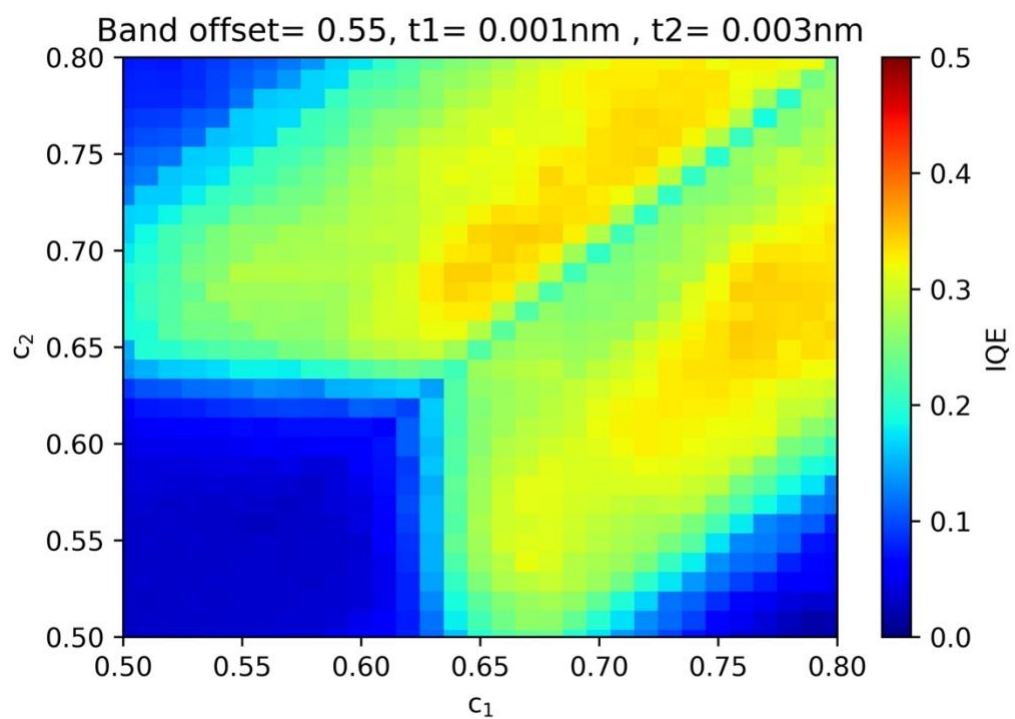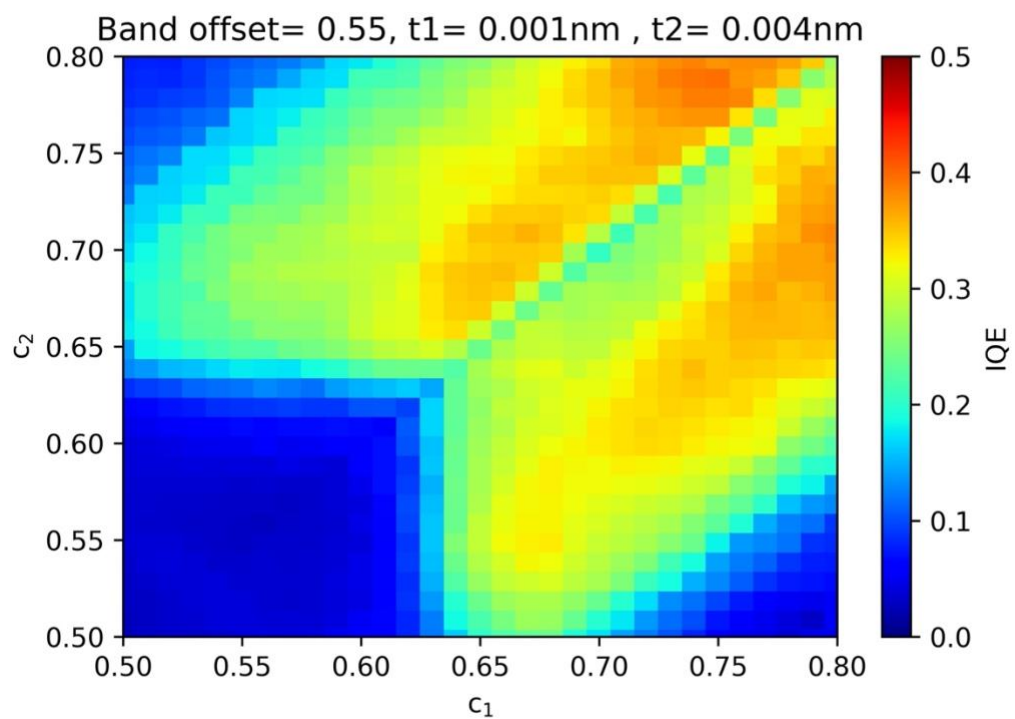

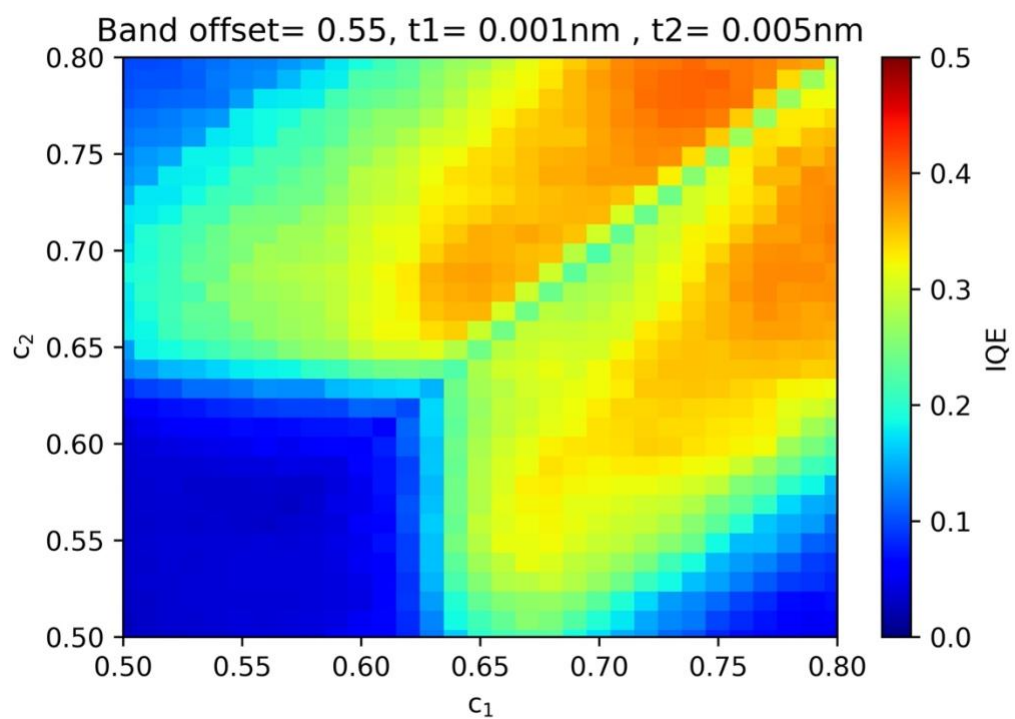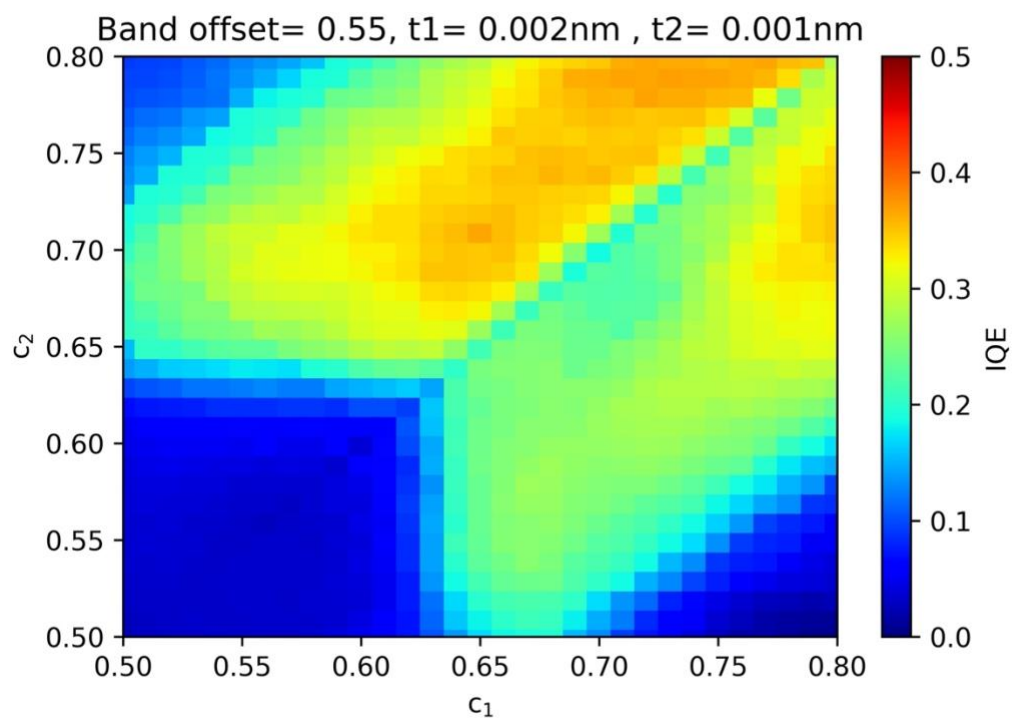

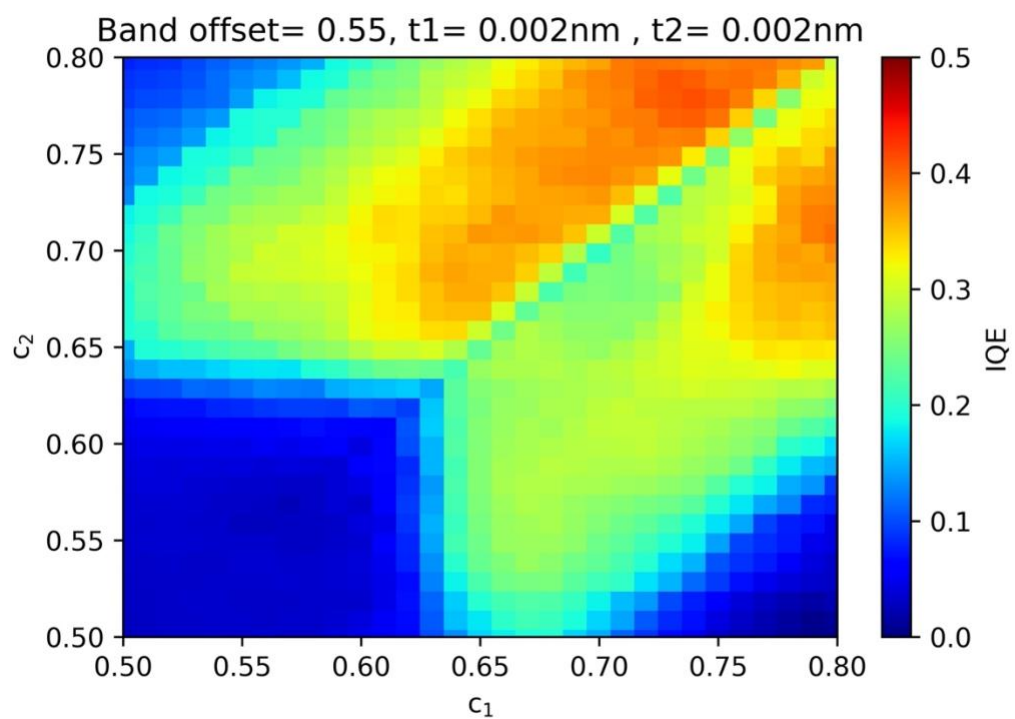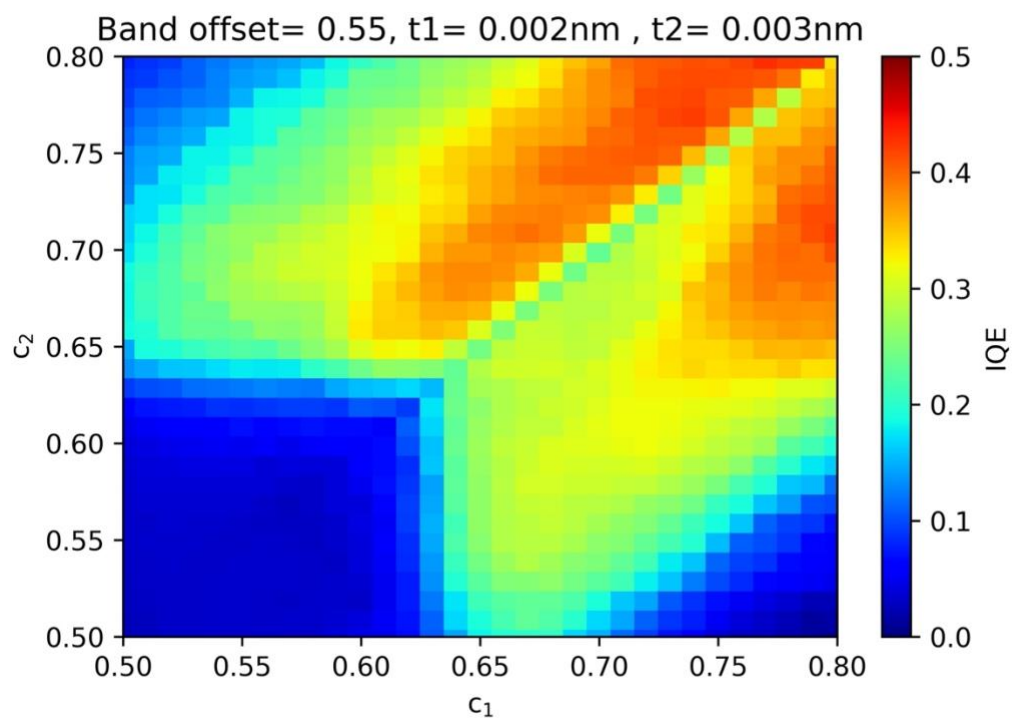

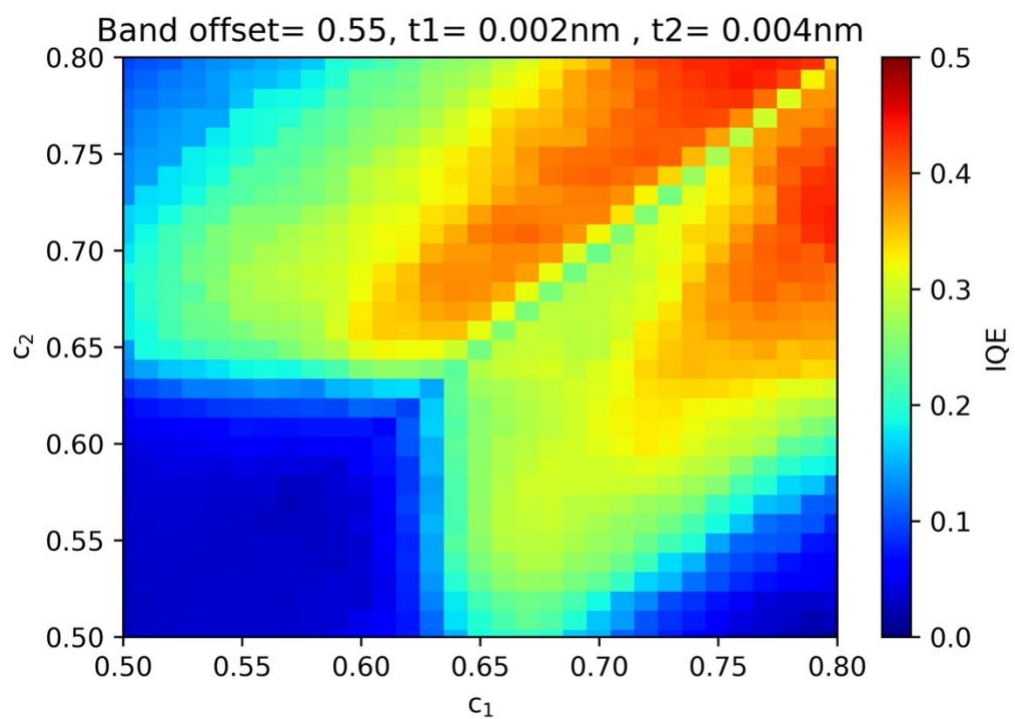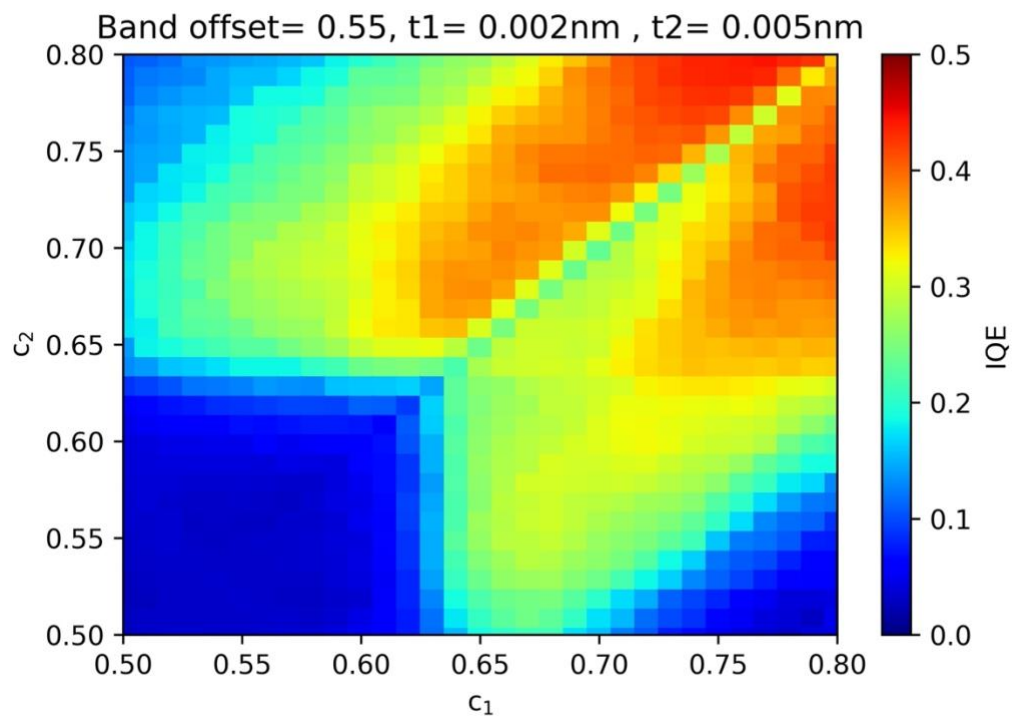



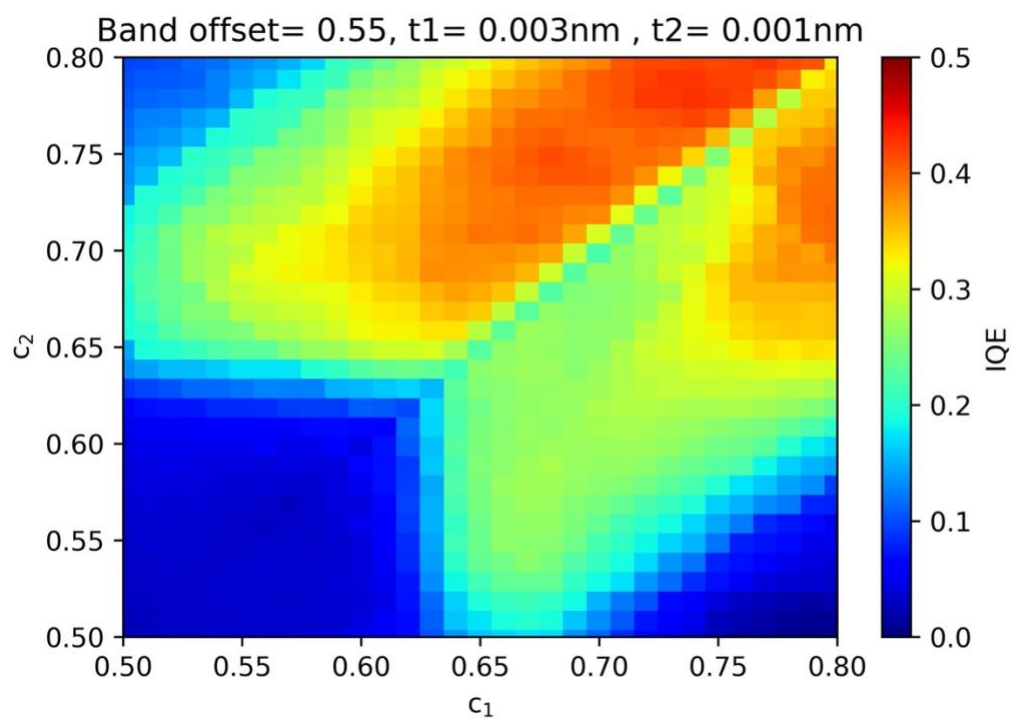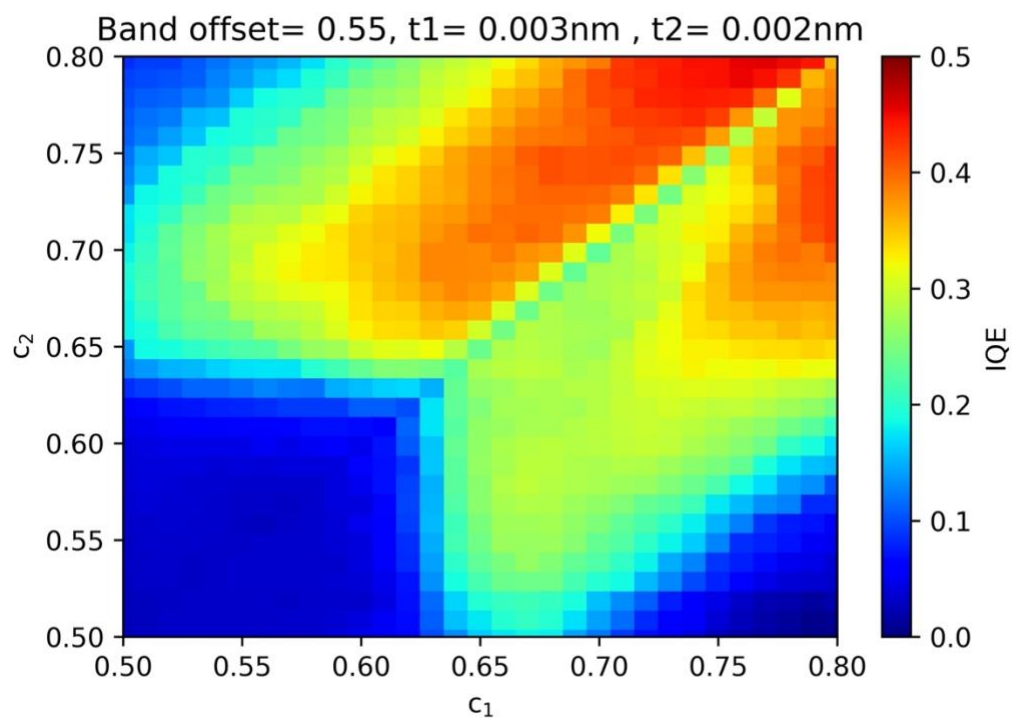

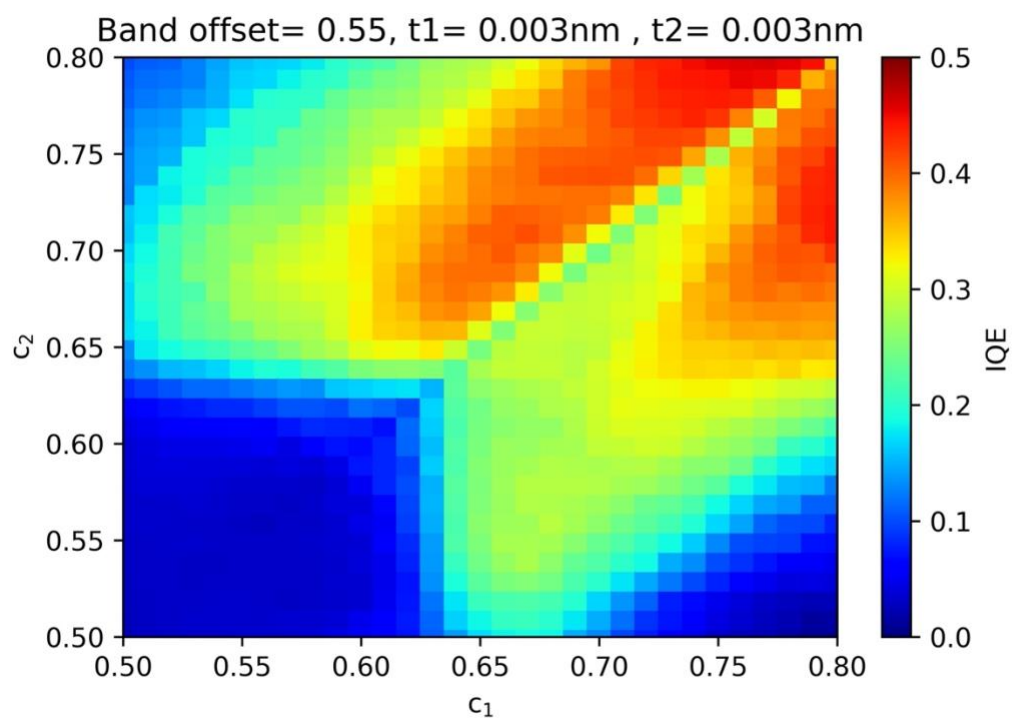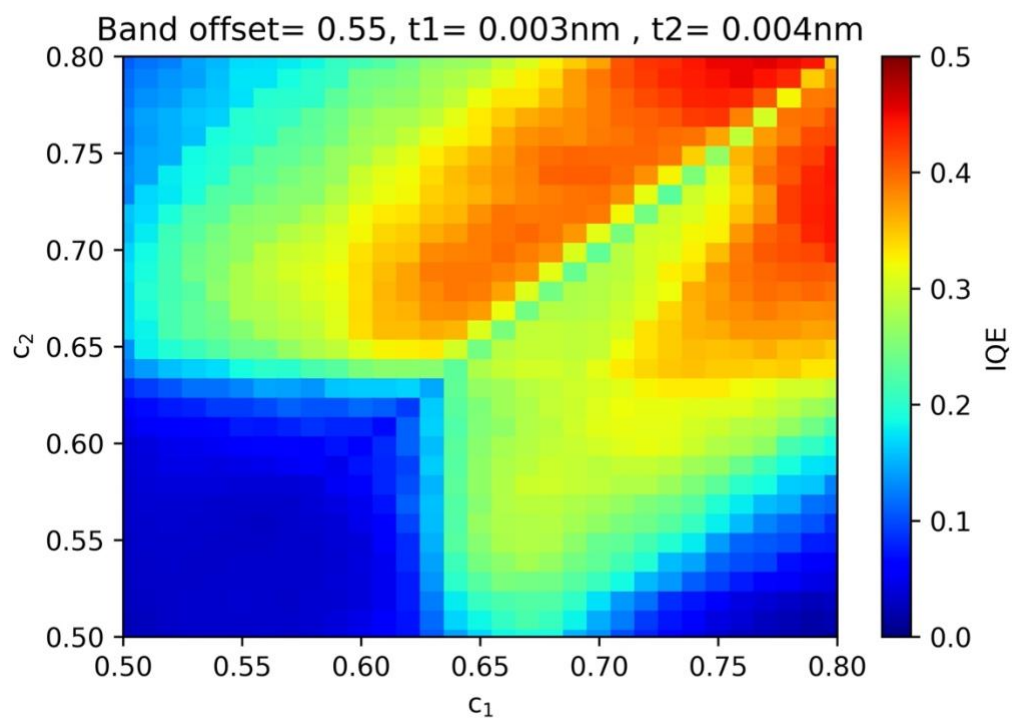



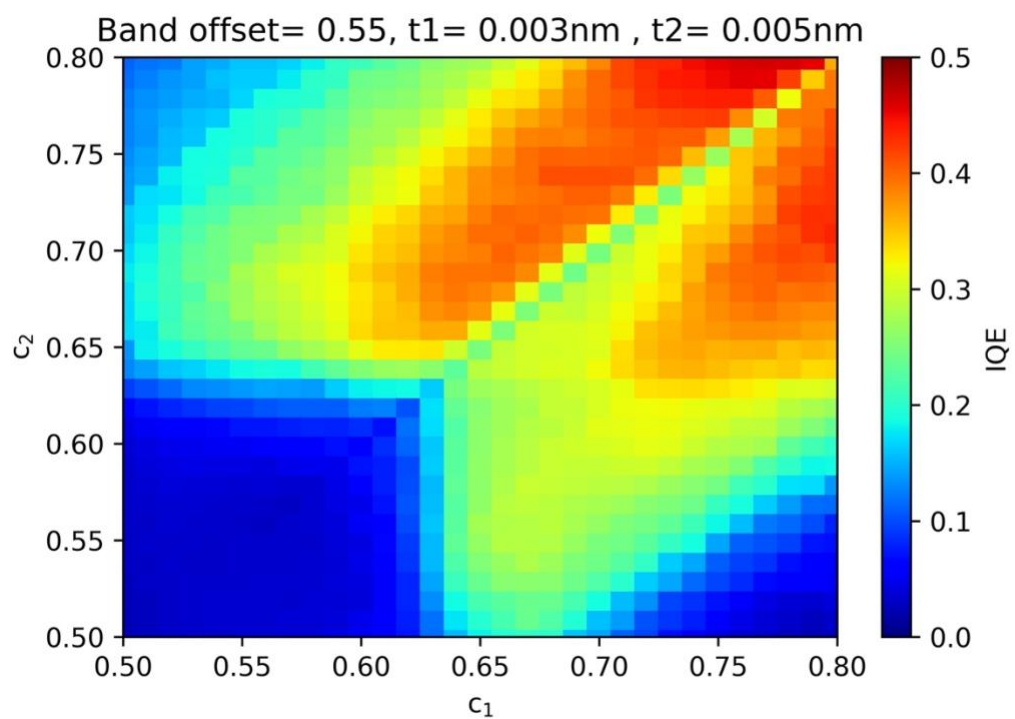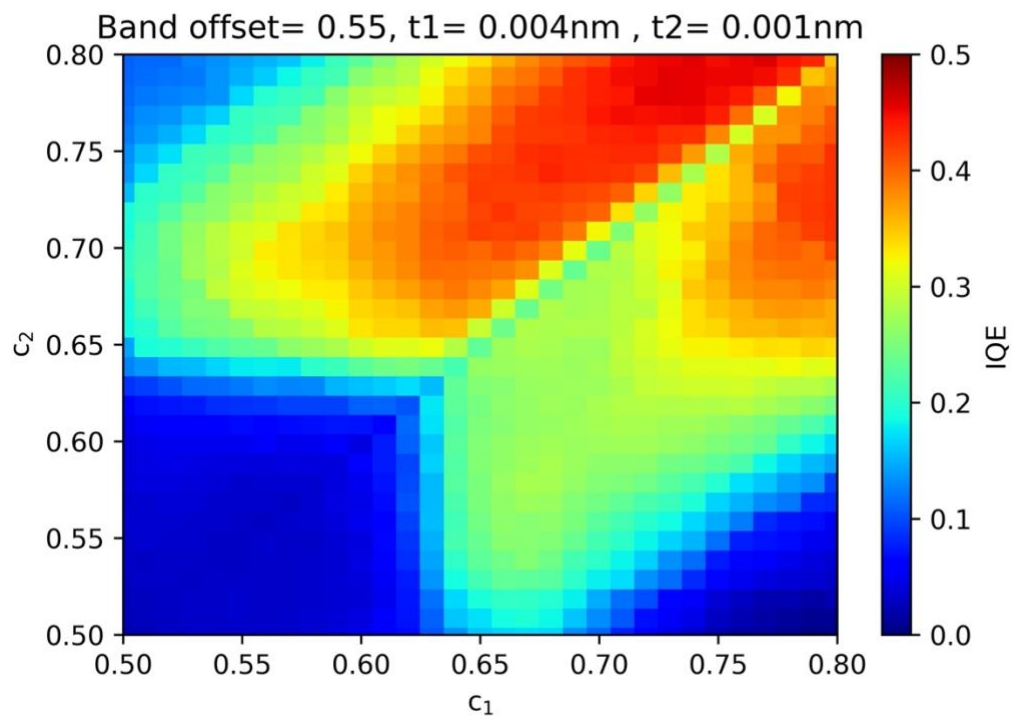

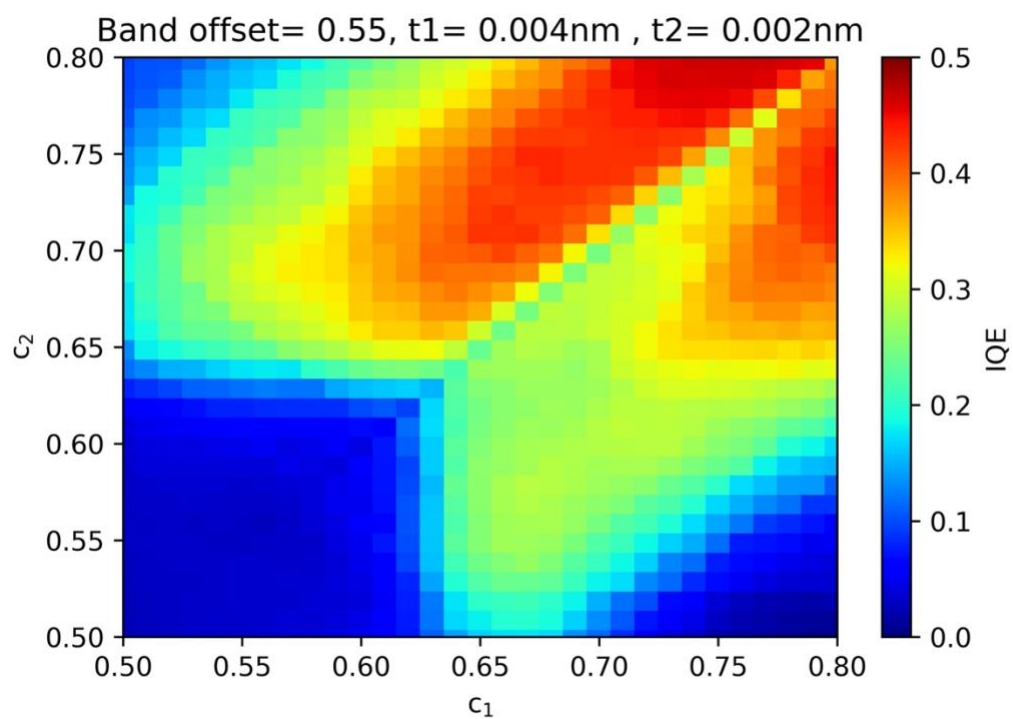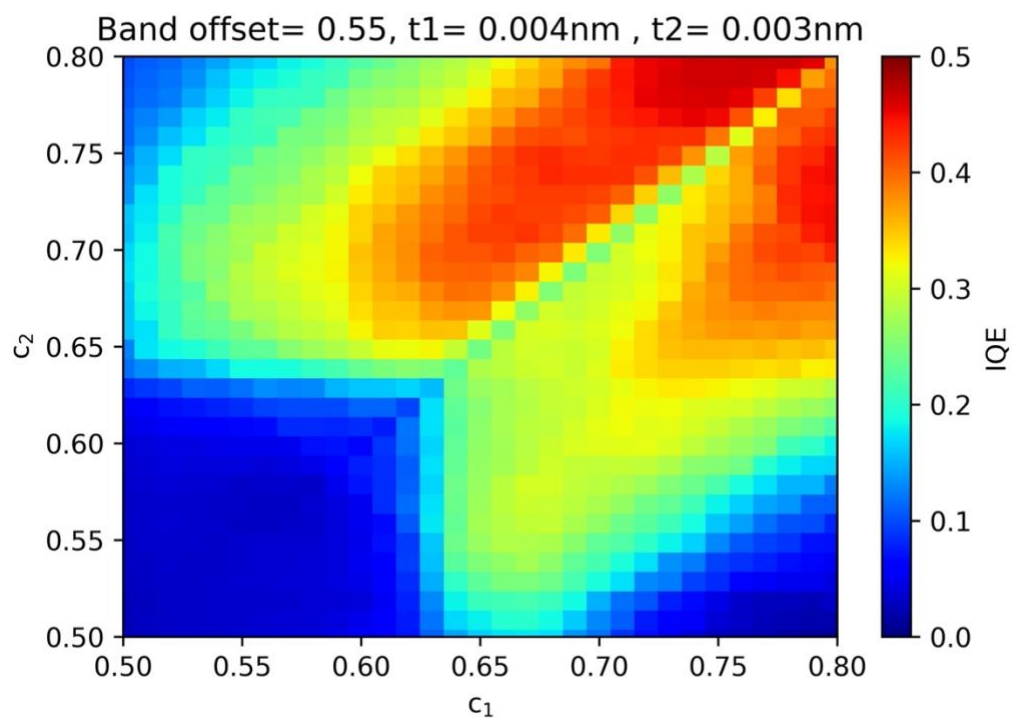

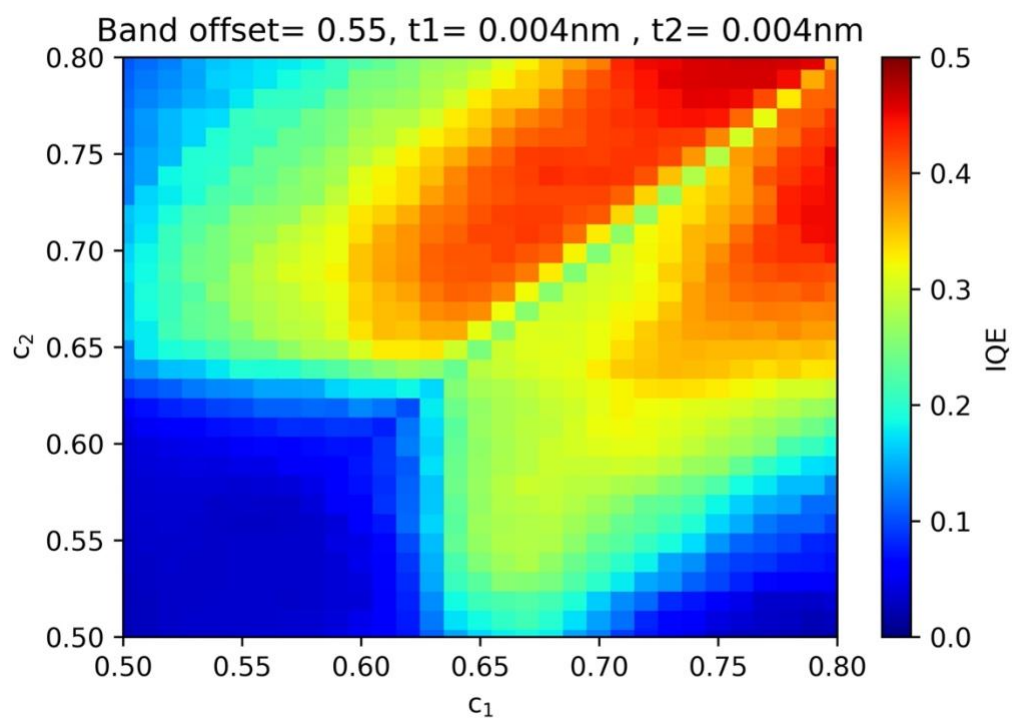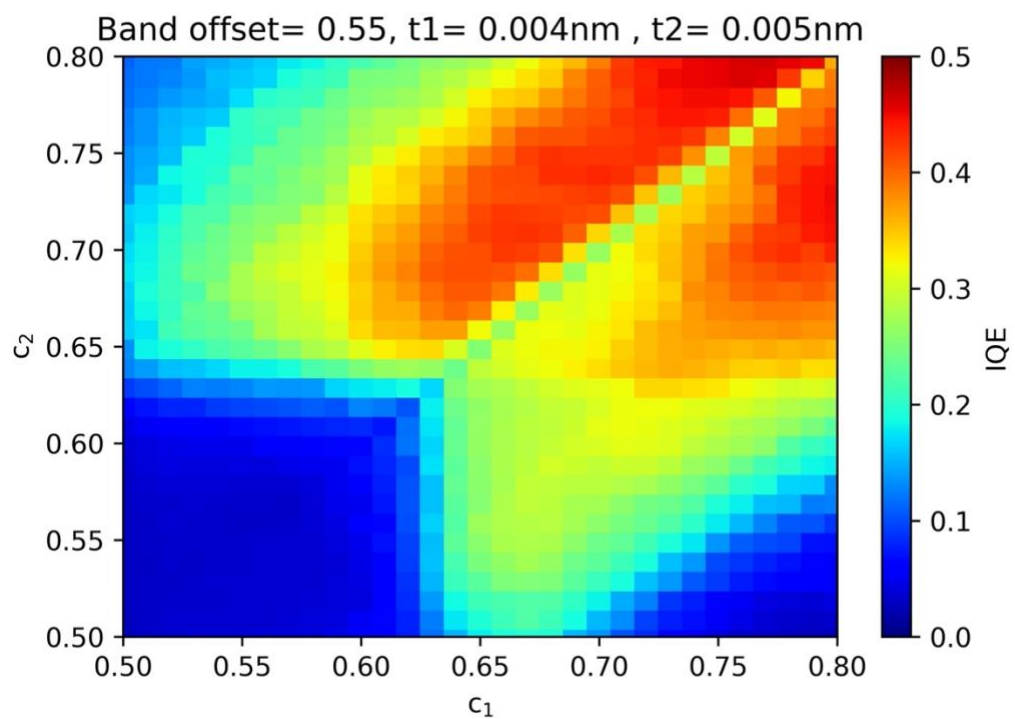

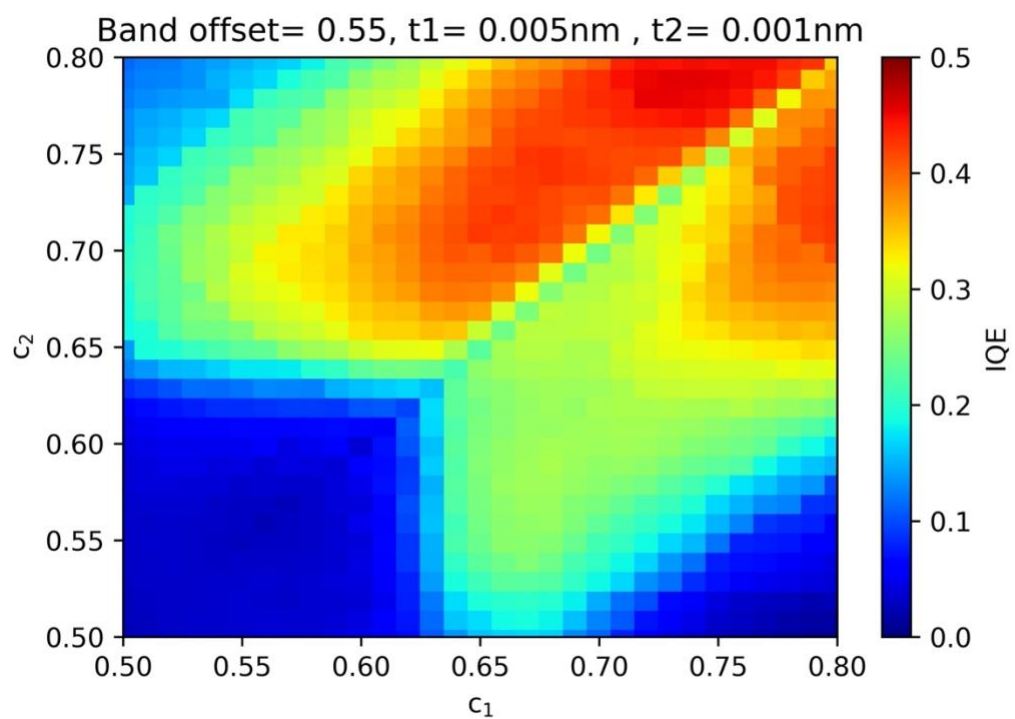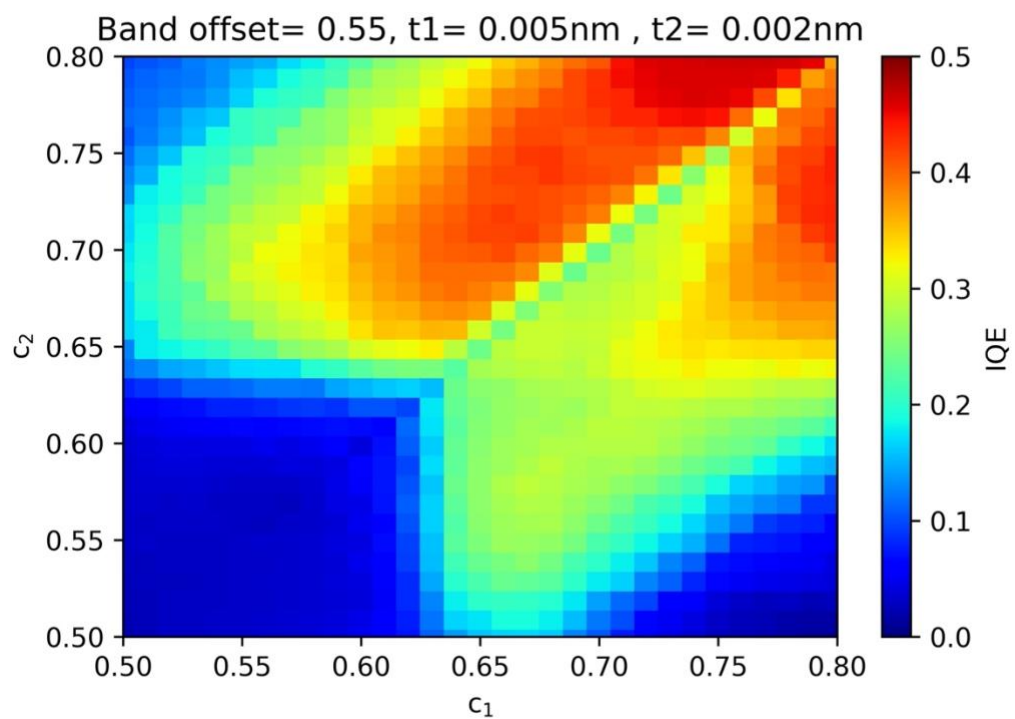

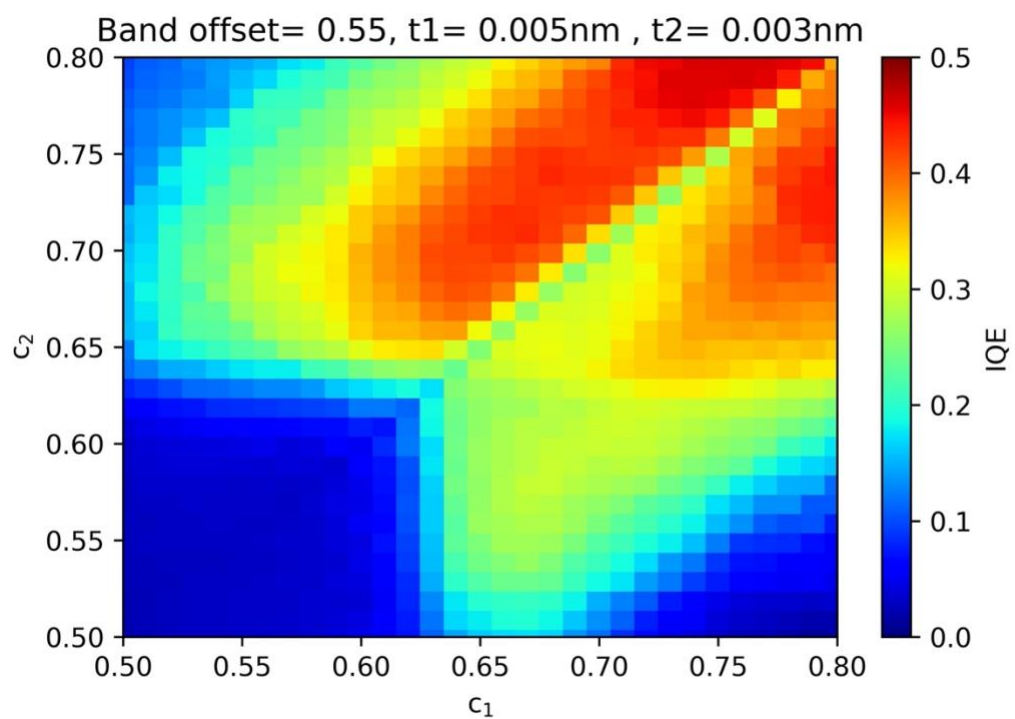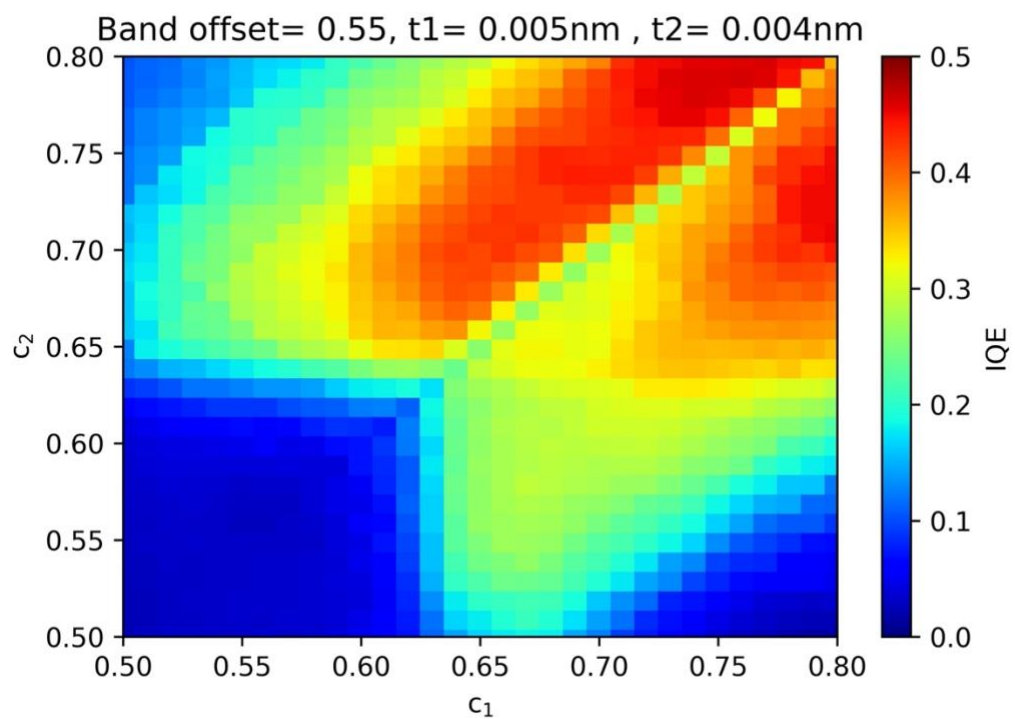



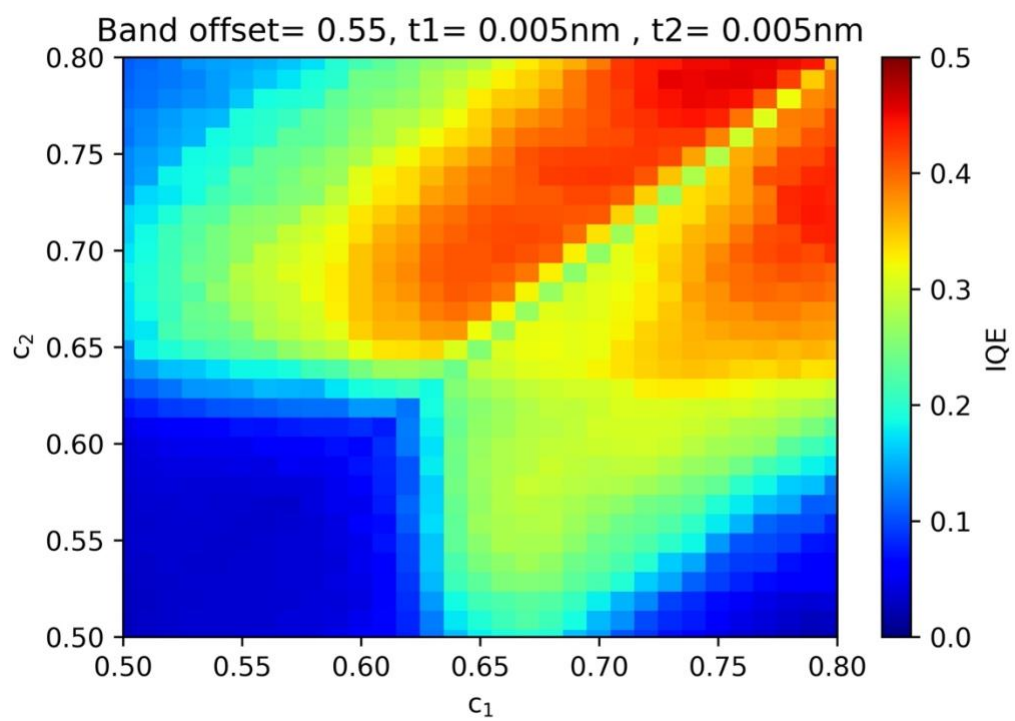

**S2. Internal quantum efficiency (IQE) predictions from stacked XGBoost/LightGBM model of superlattice (SL) electron blocking layer (EBL) with different composition combinations under the band offset ratio = 0.6.**

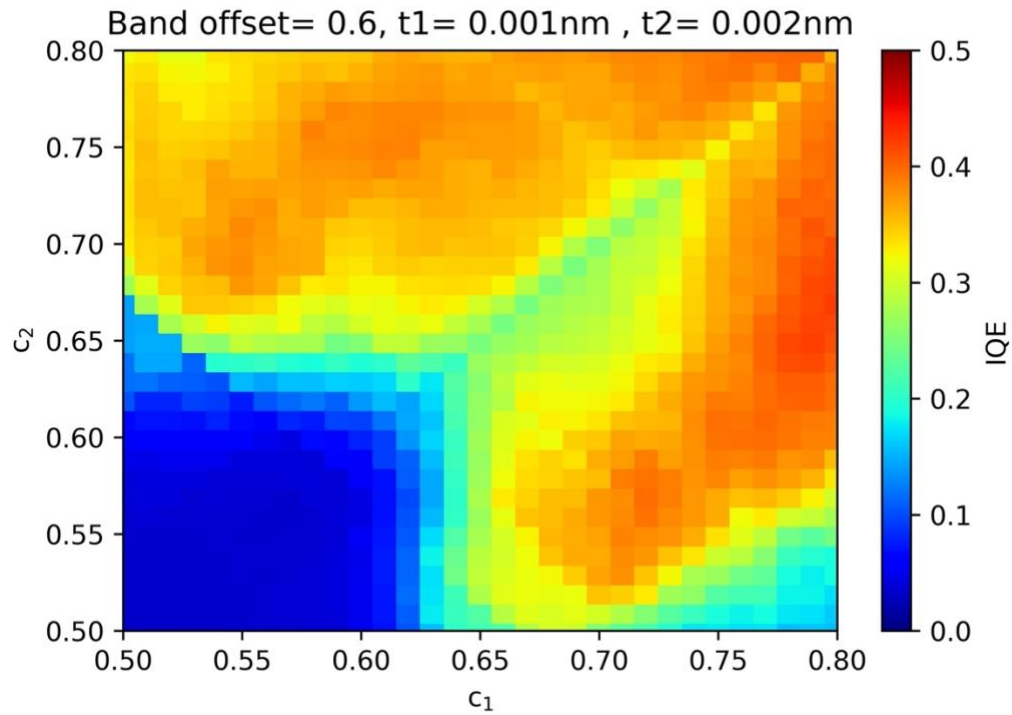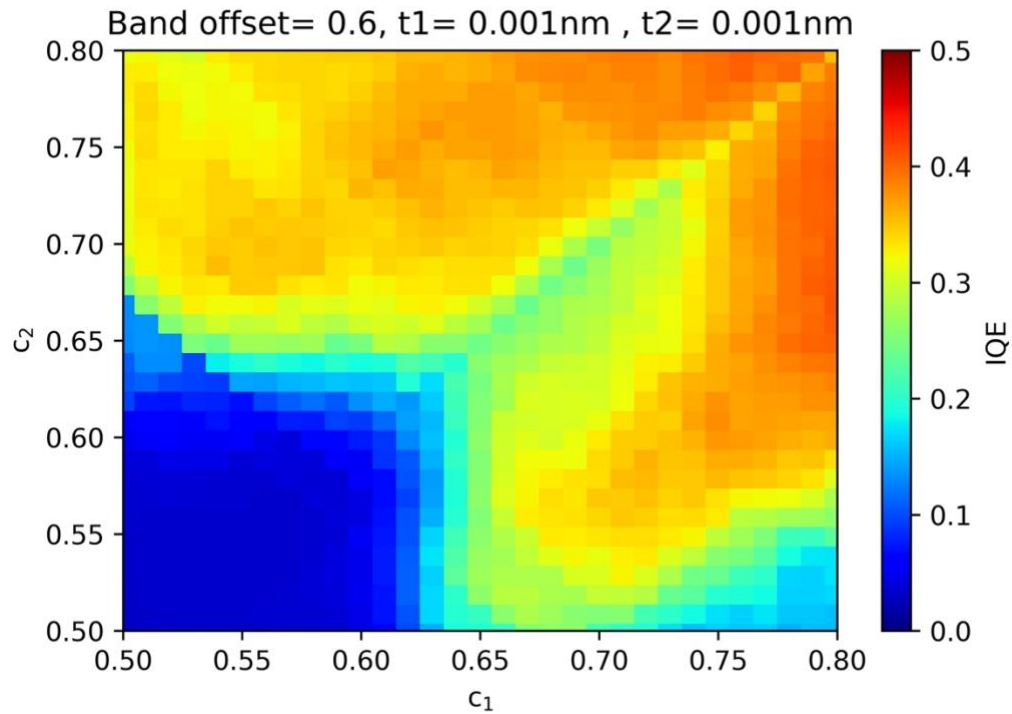

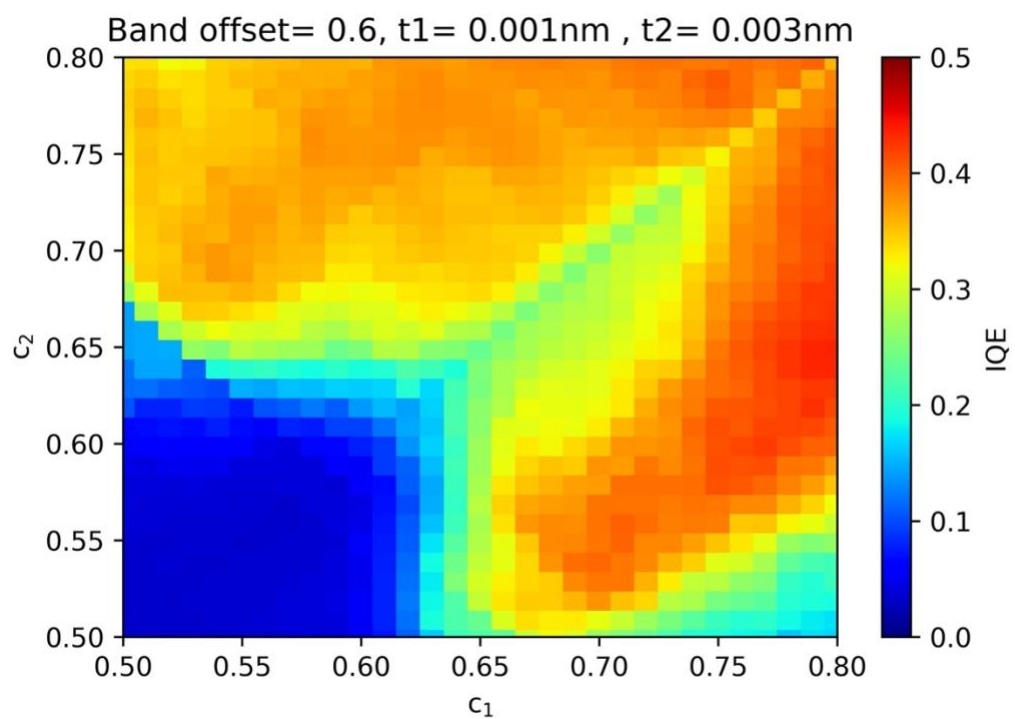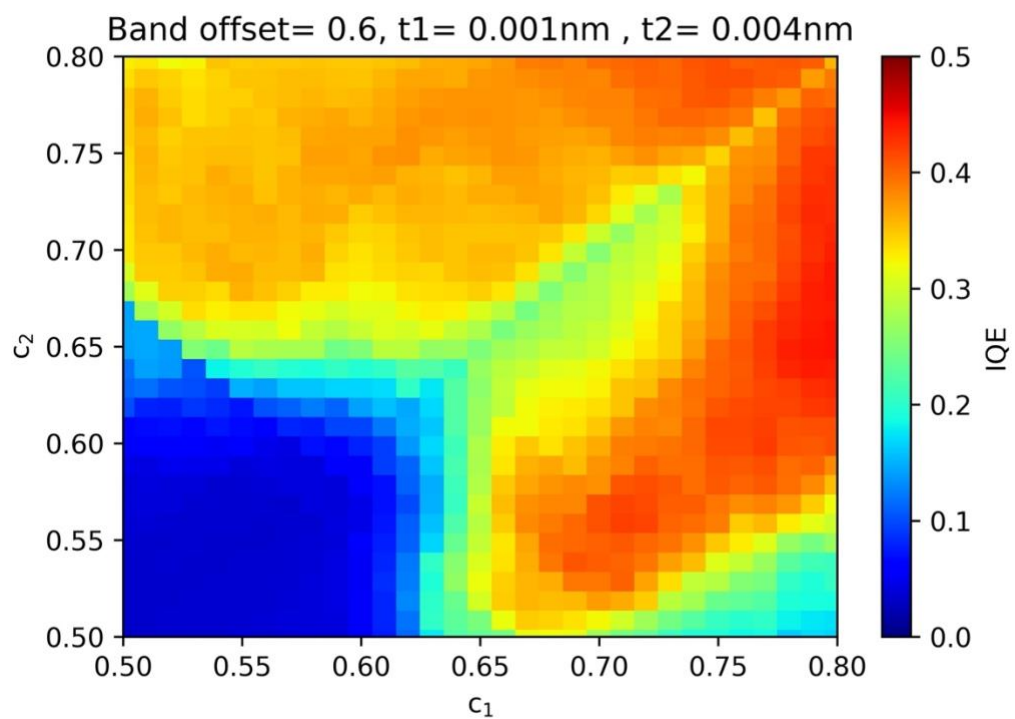

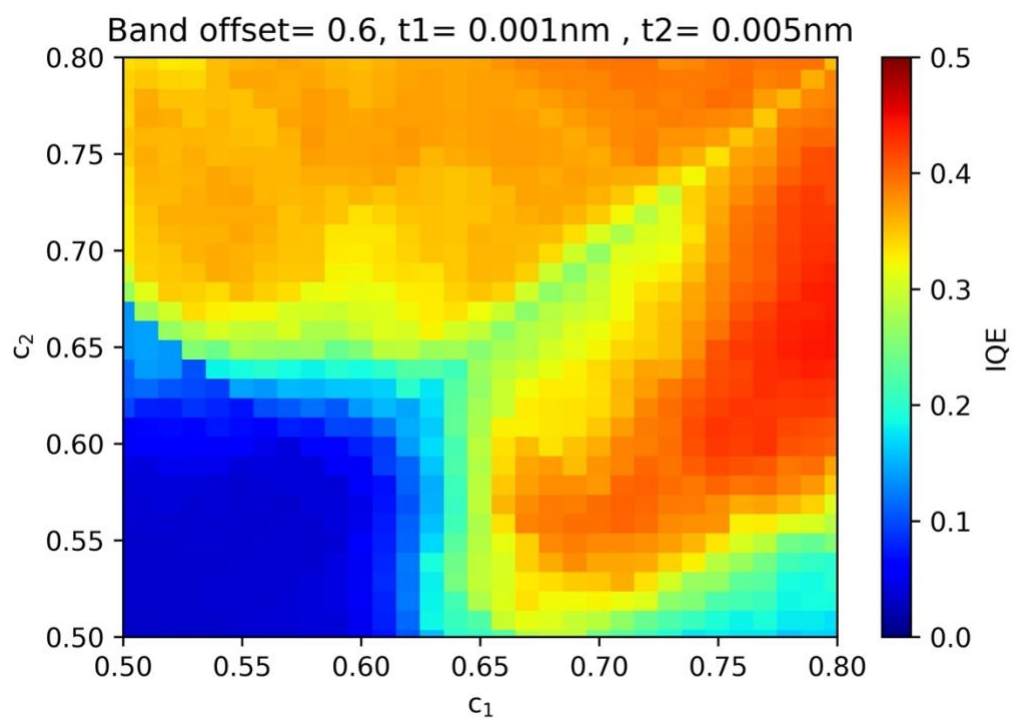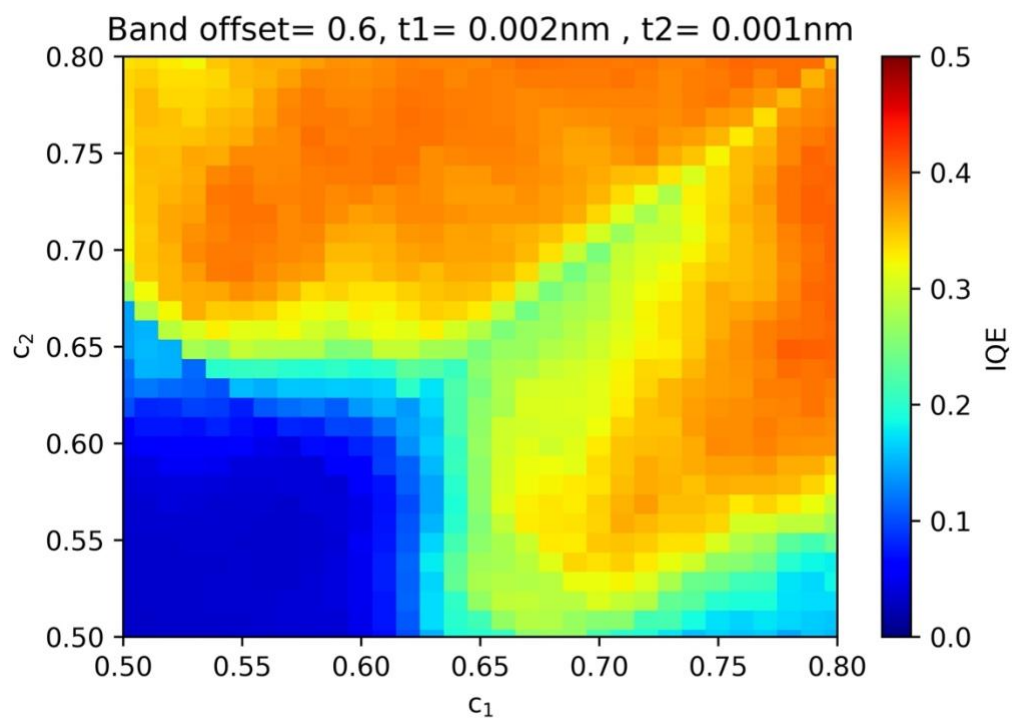

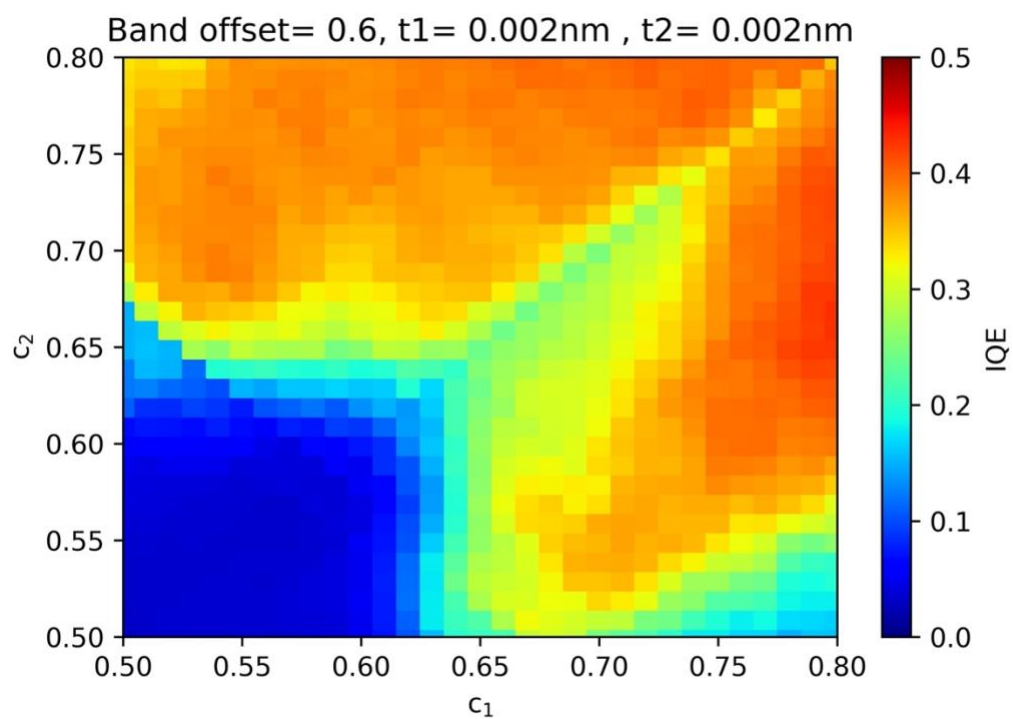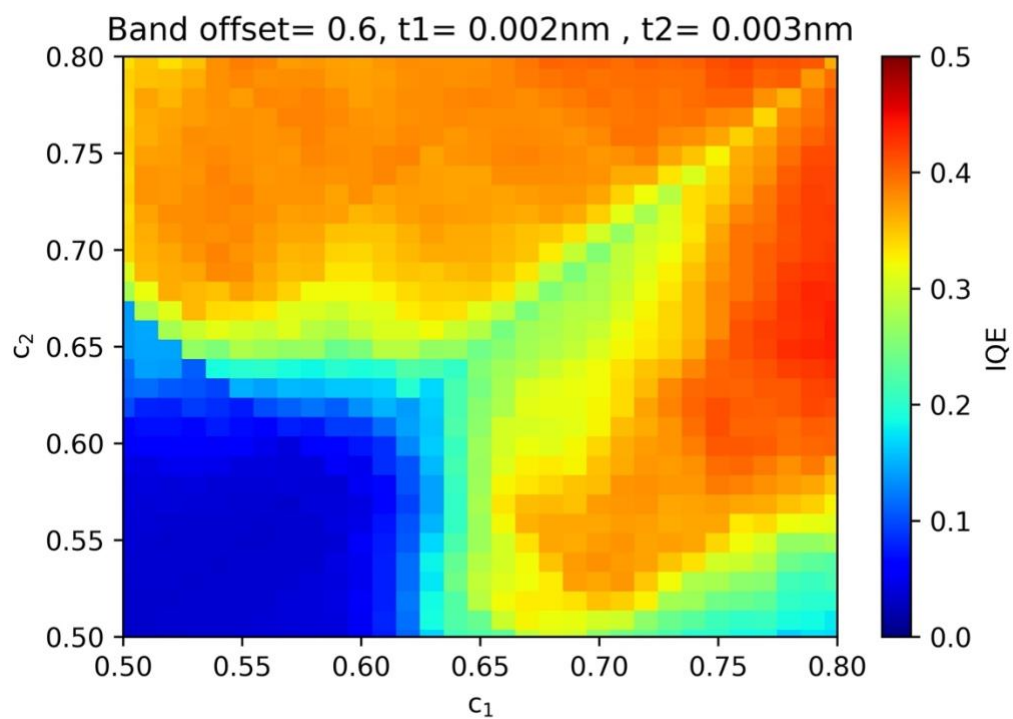



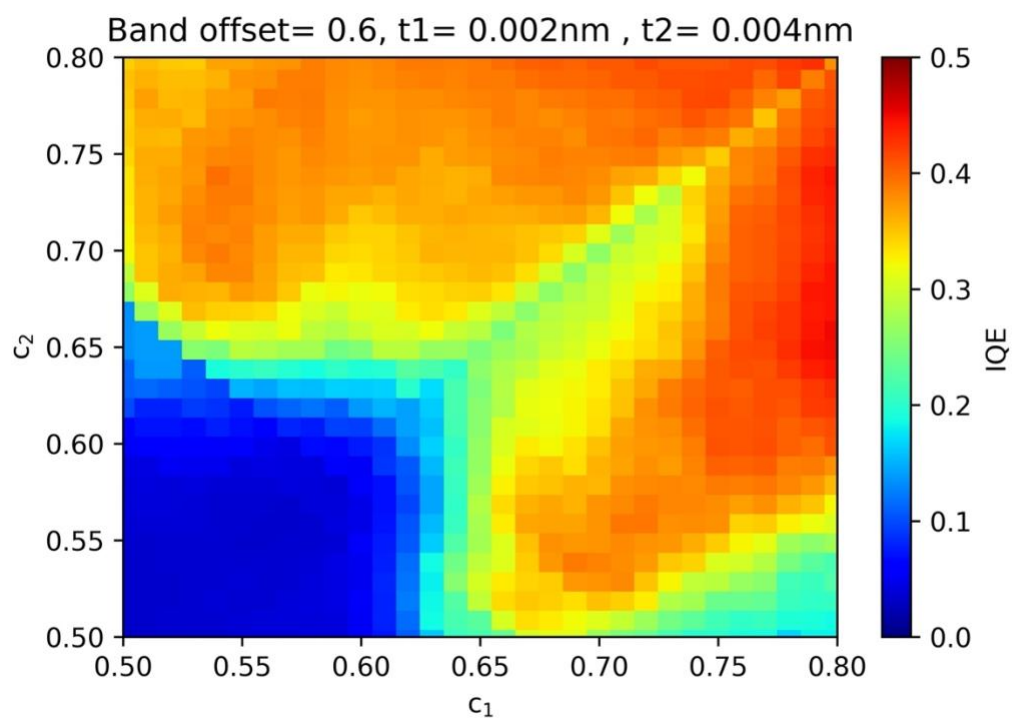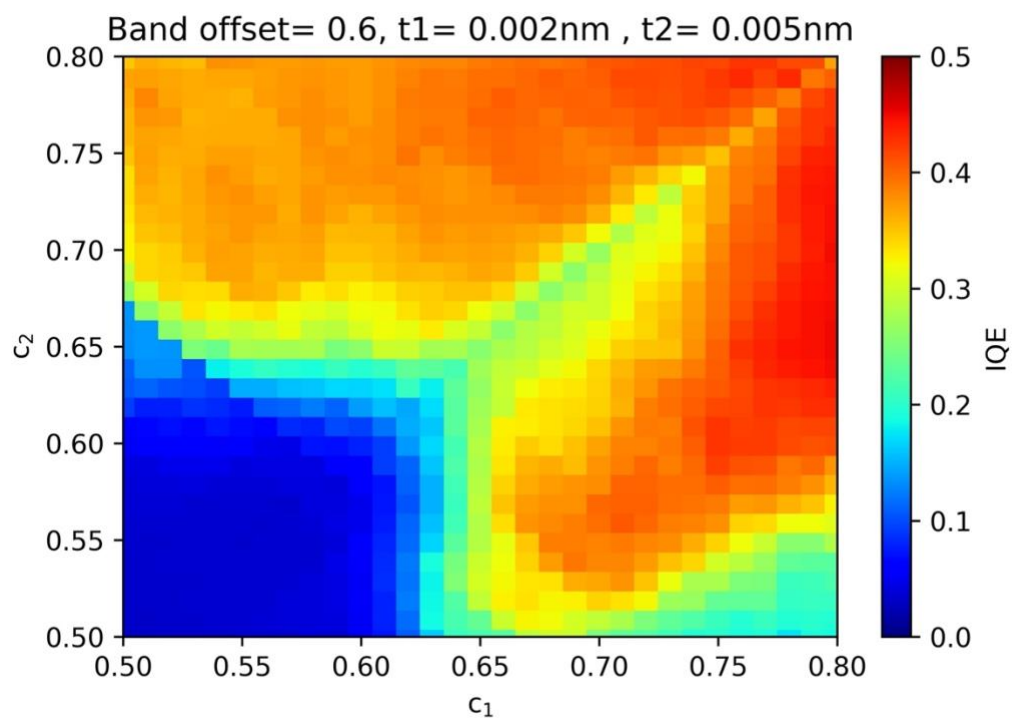

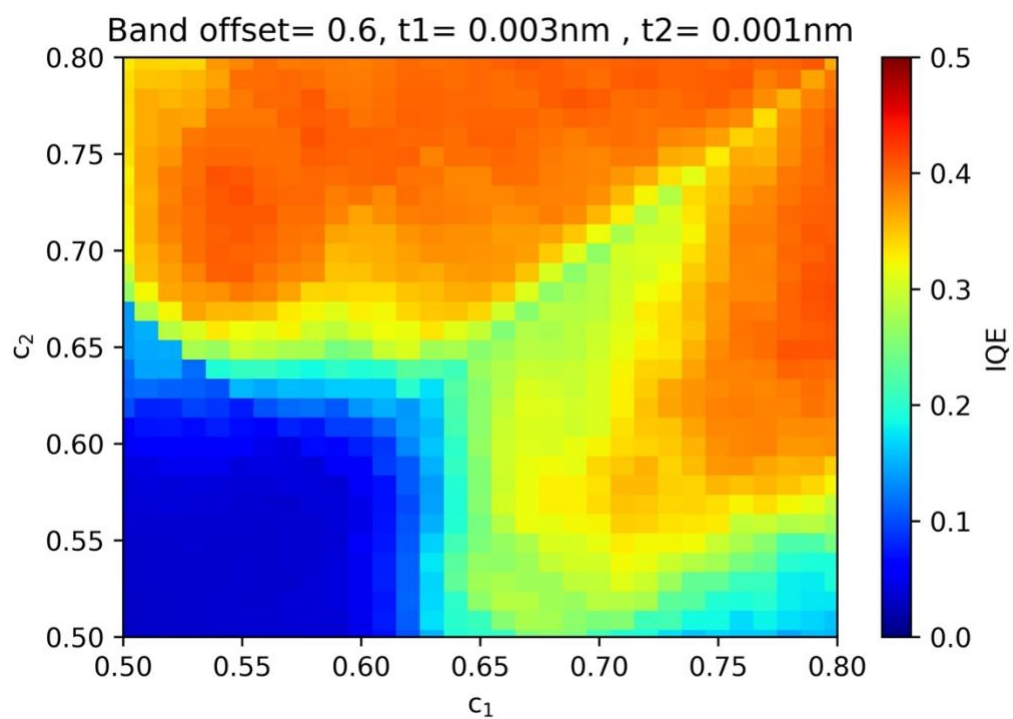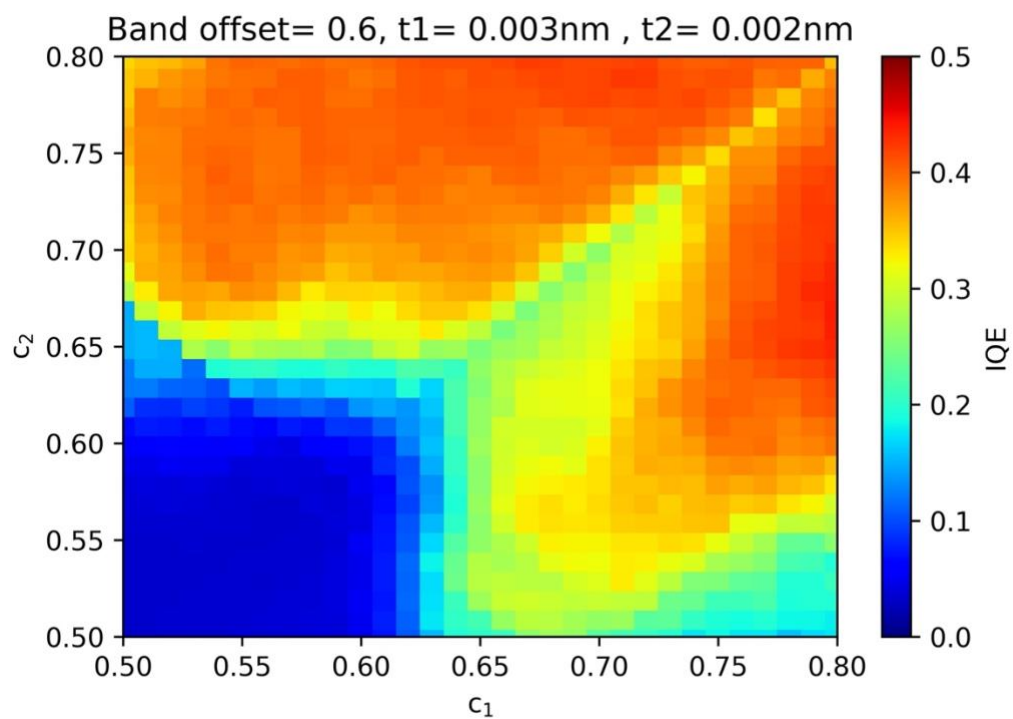

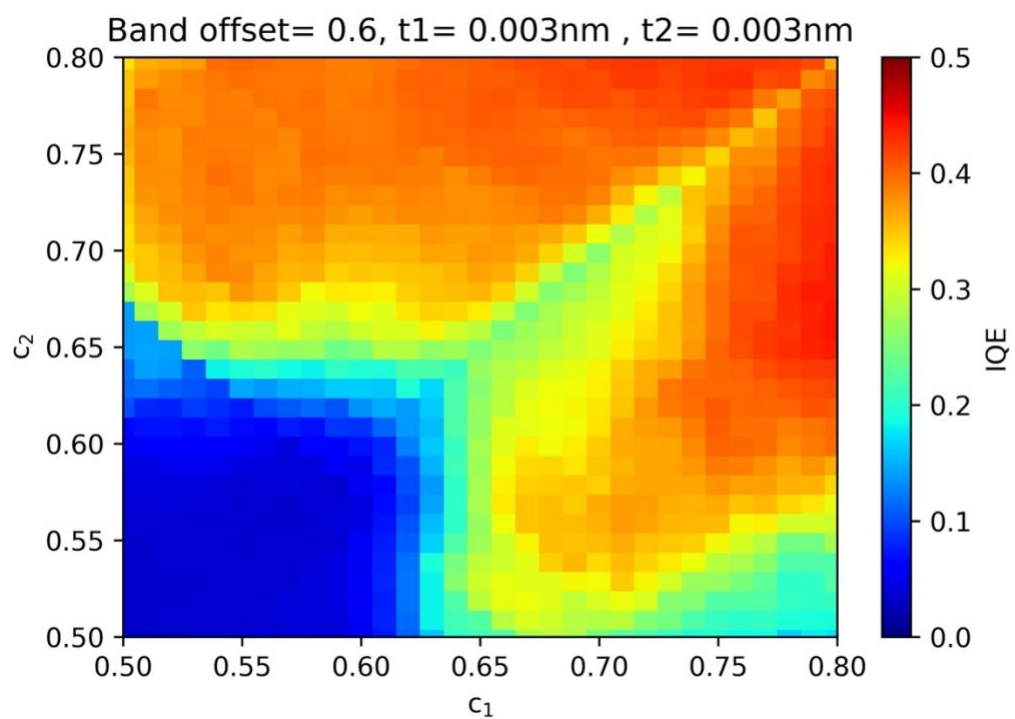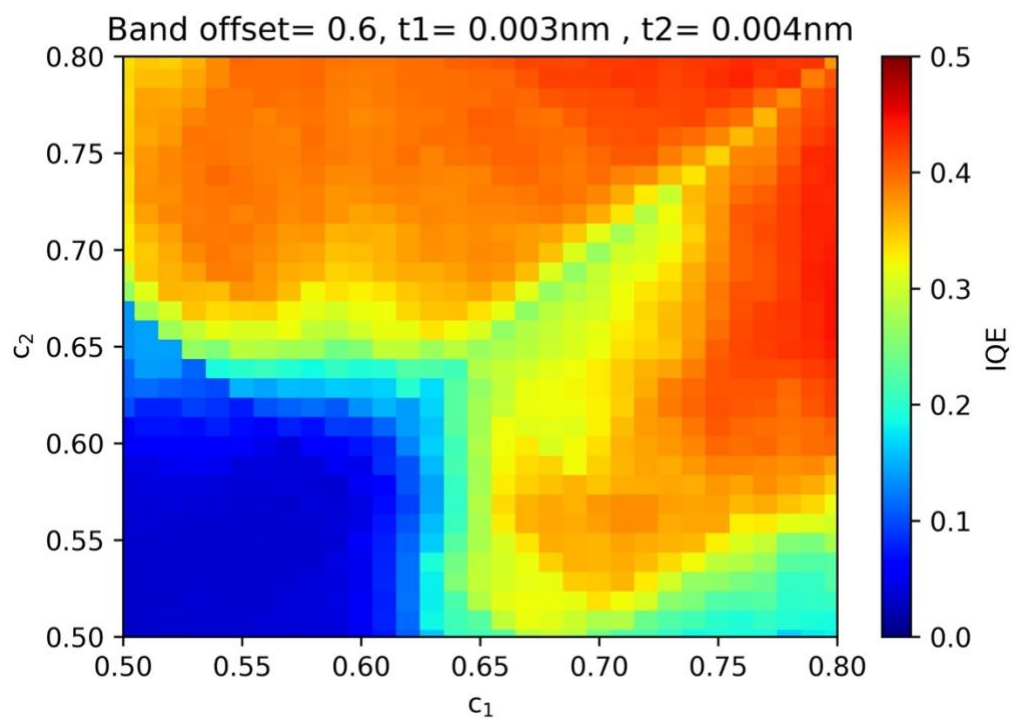

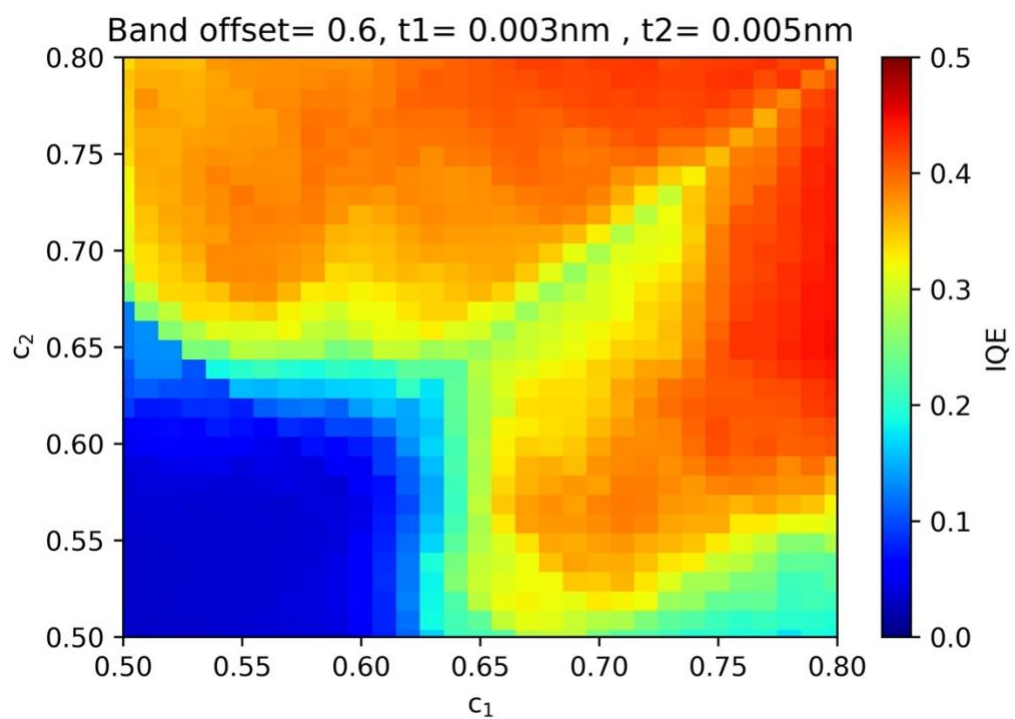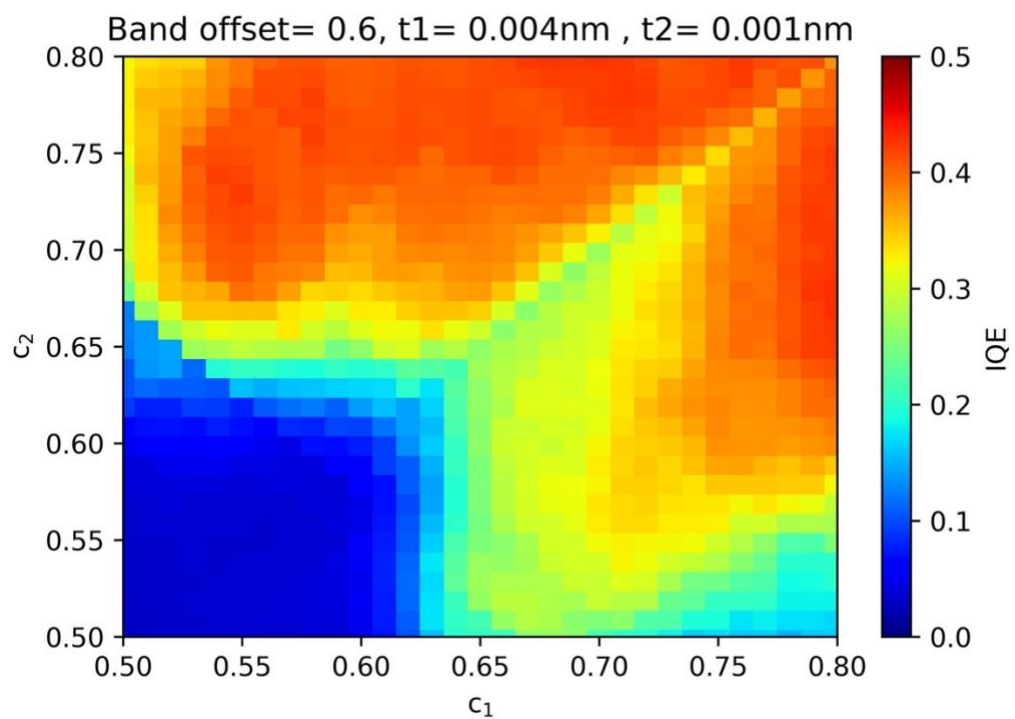

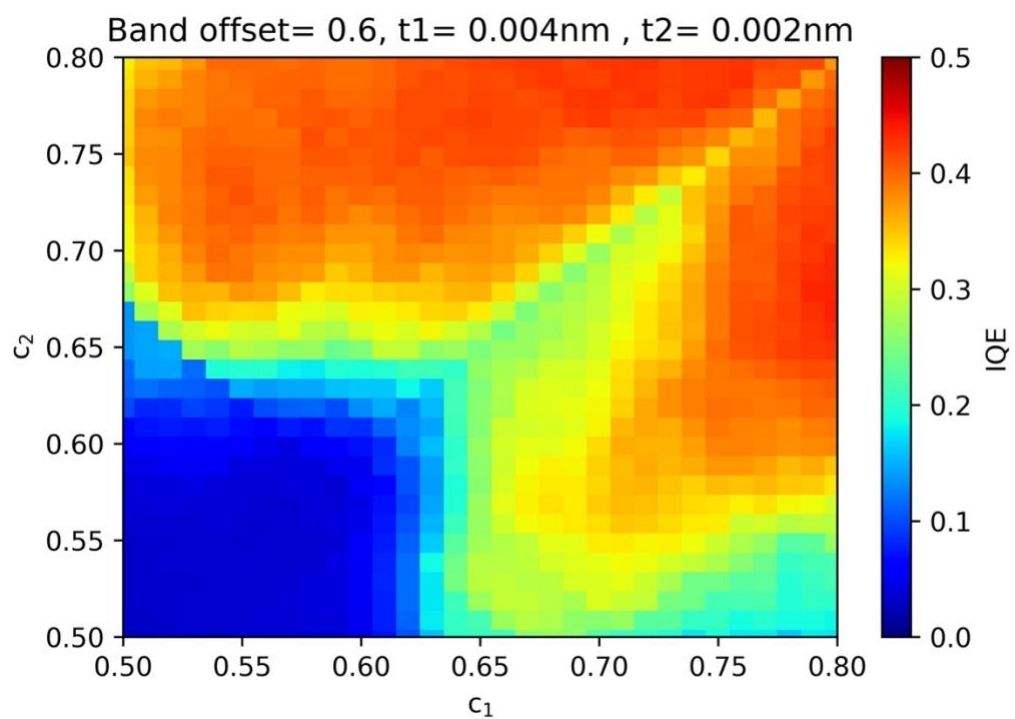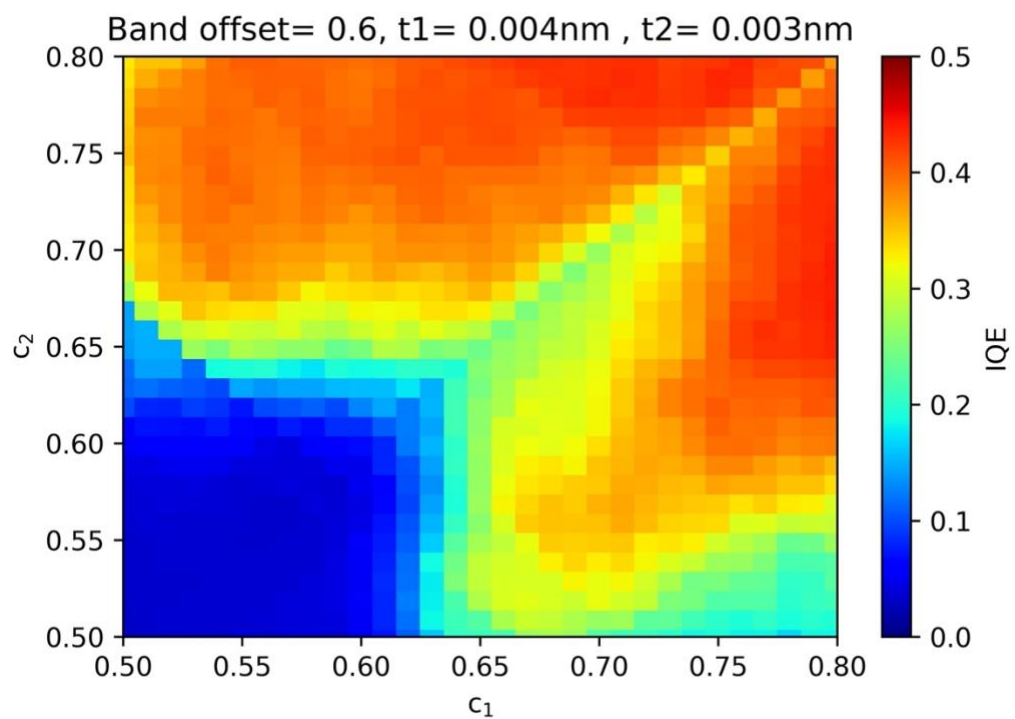



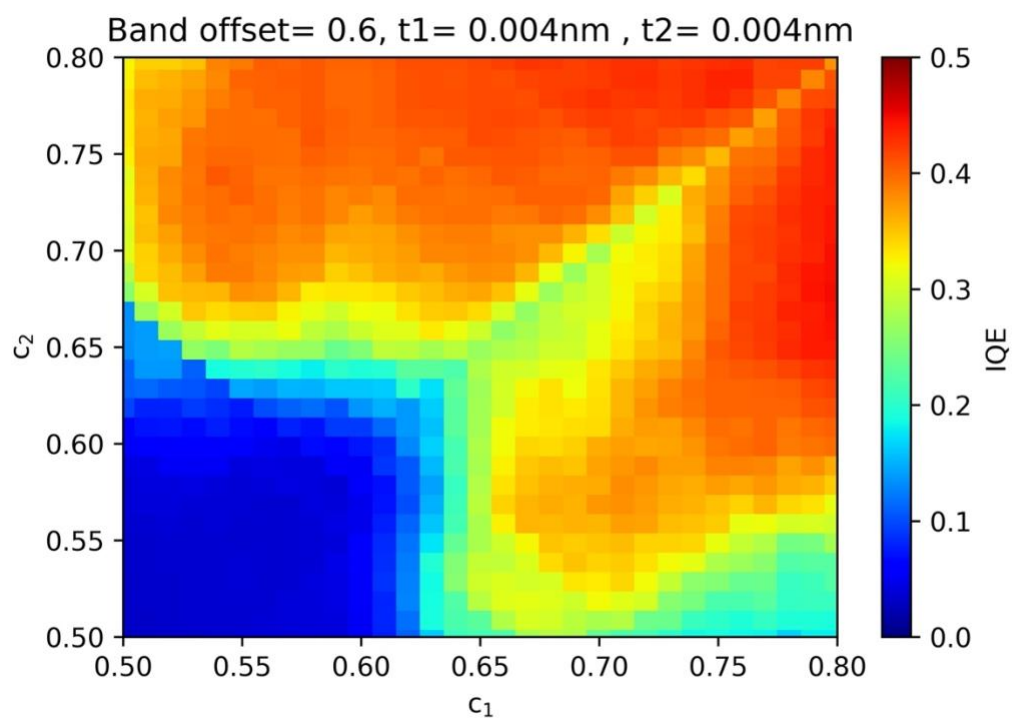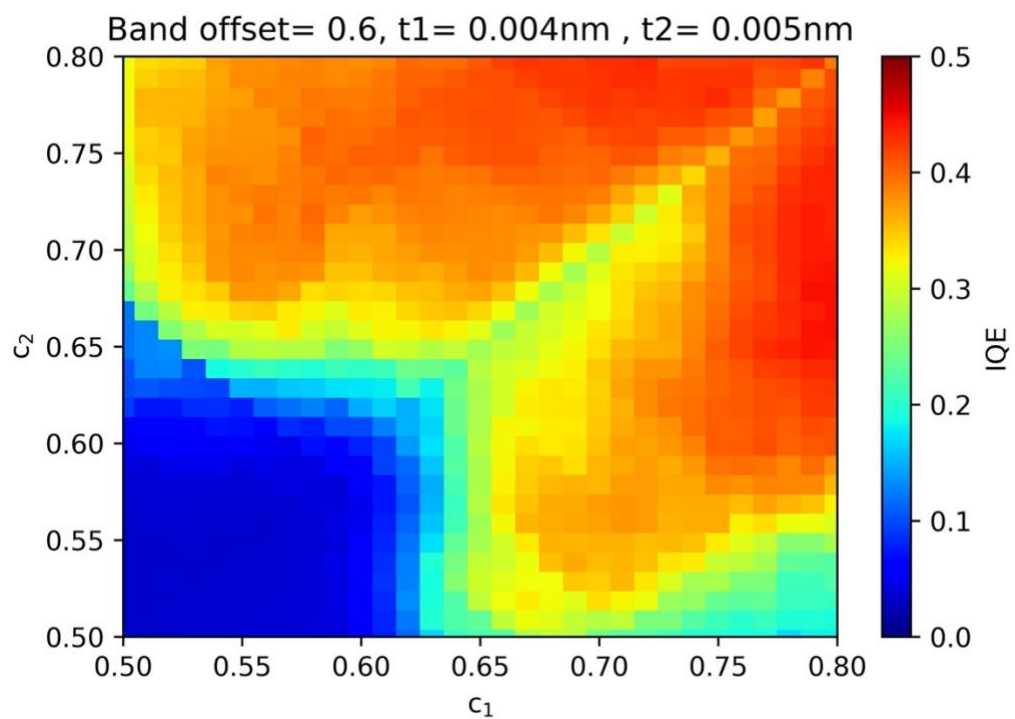

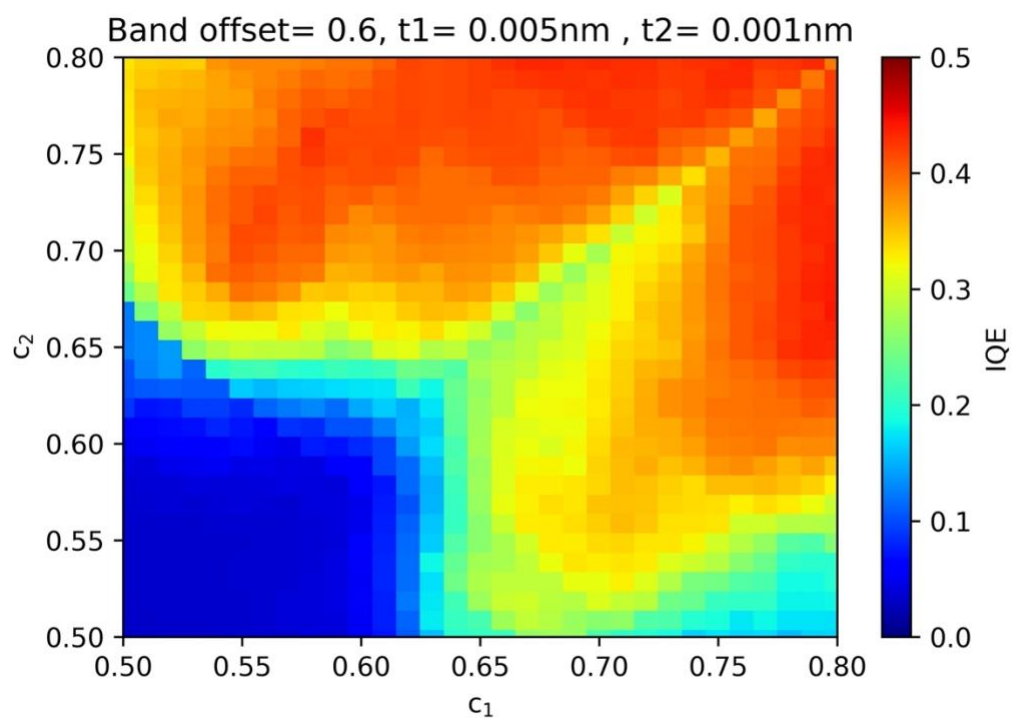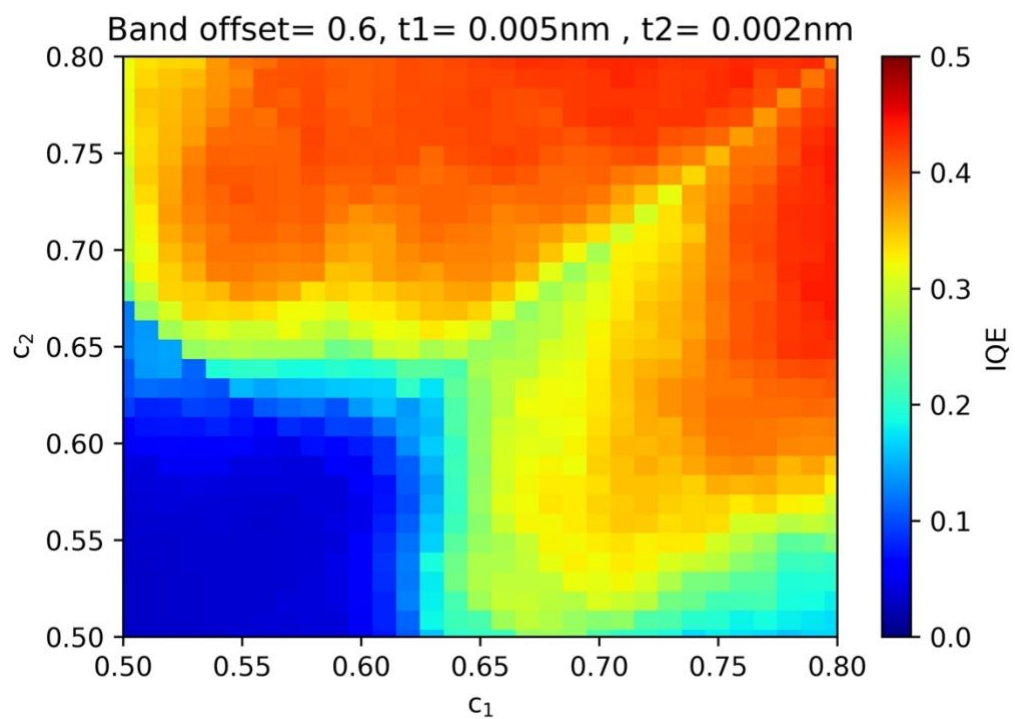

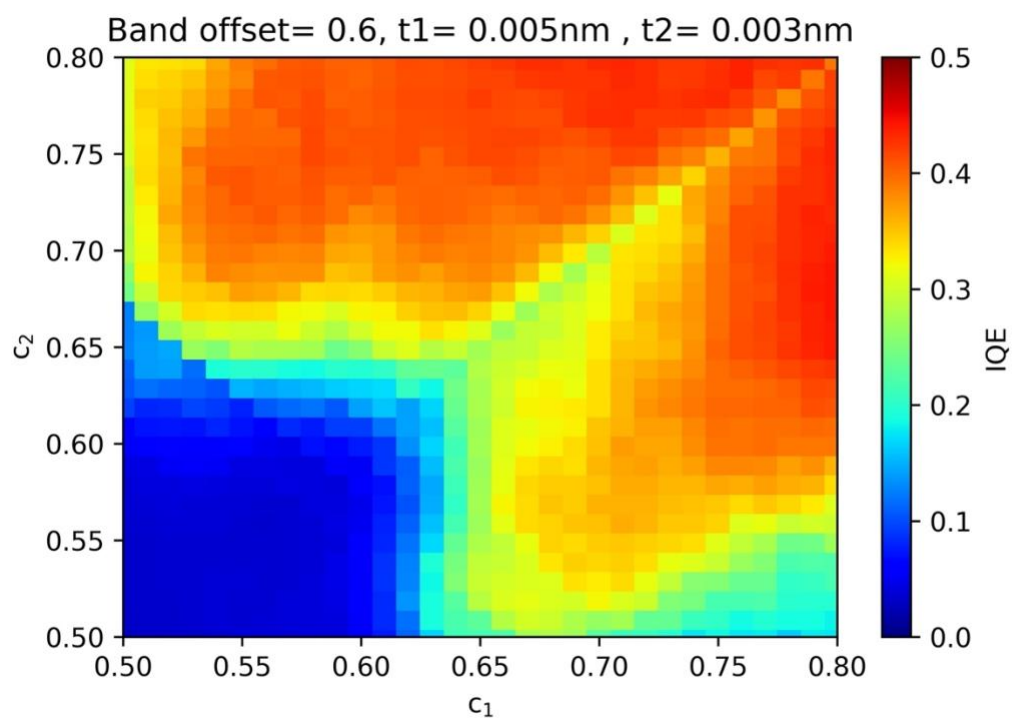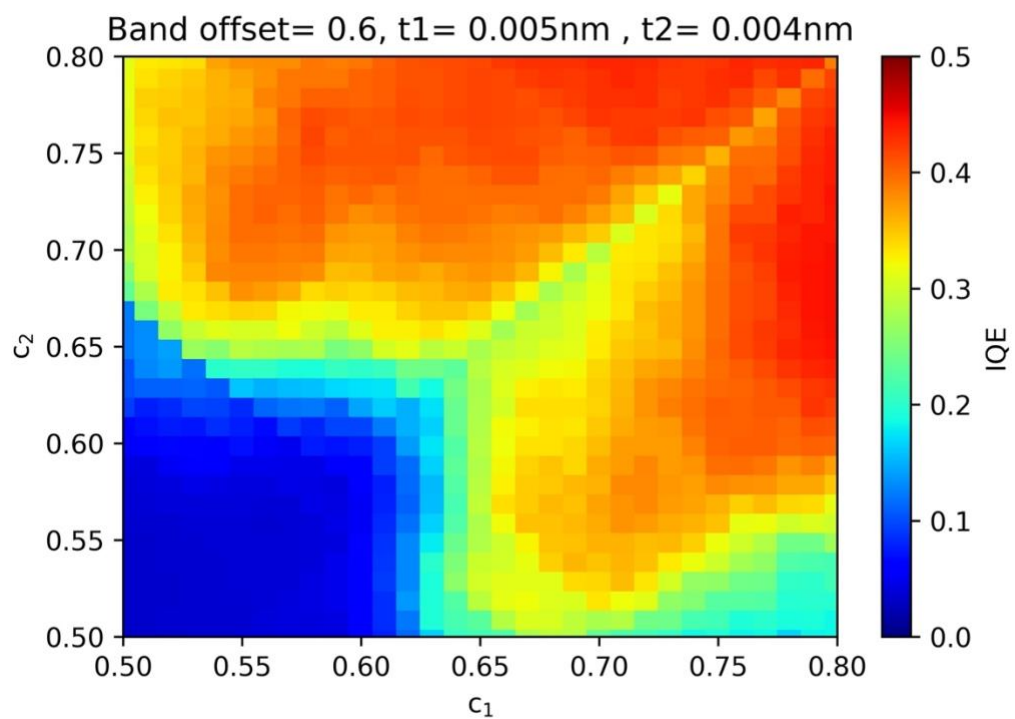

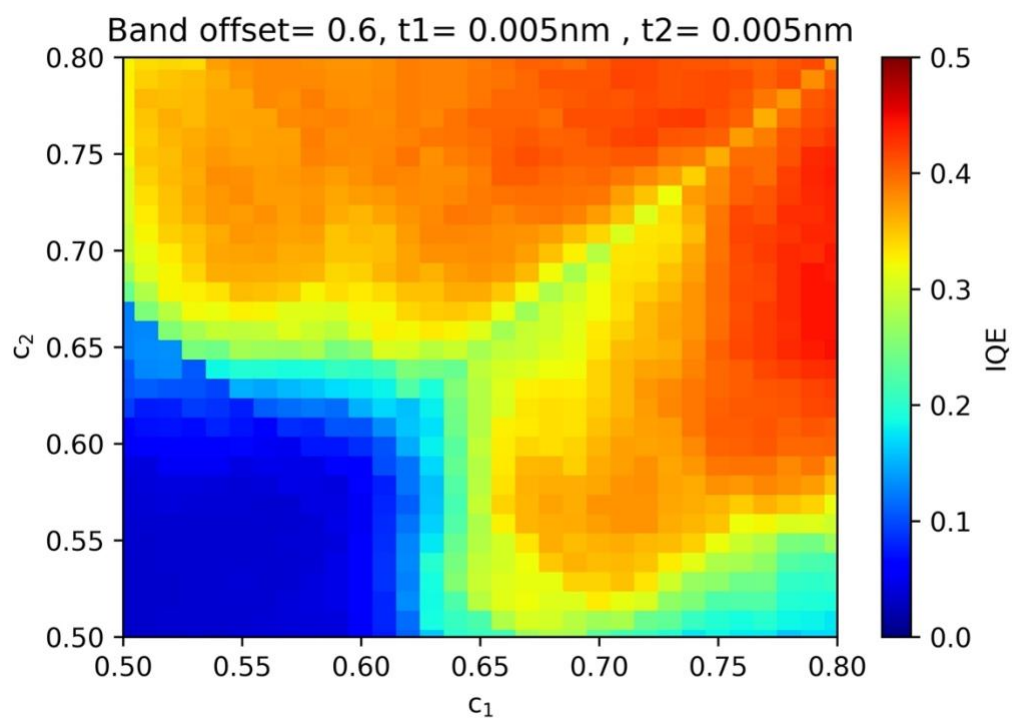

**S3. Internal quantum efficiency (IQE) predictions from stacked XGBoost/LightGBM model of superlattice (SL) electron blocking layer (EBL) with different composition combinations under the band offset ratio = 0.65.**

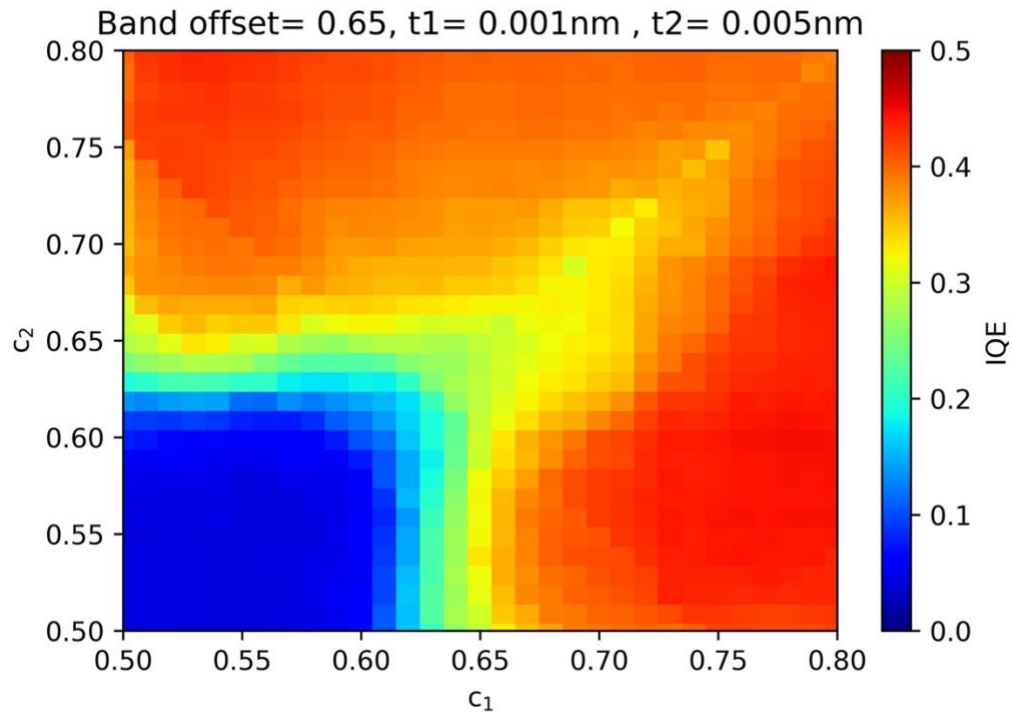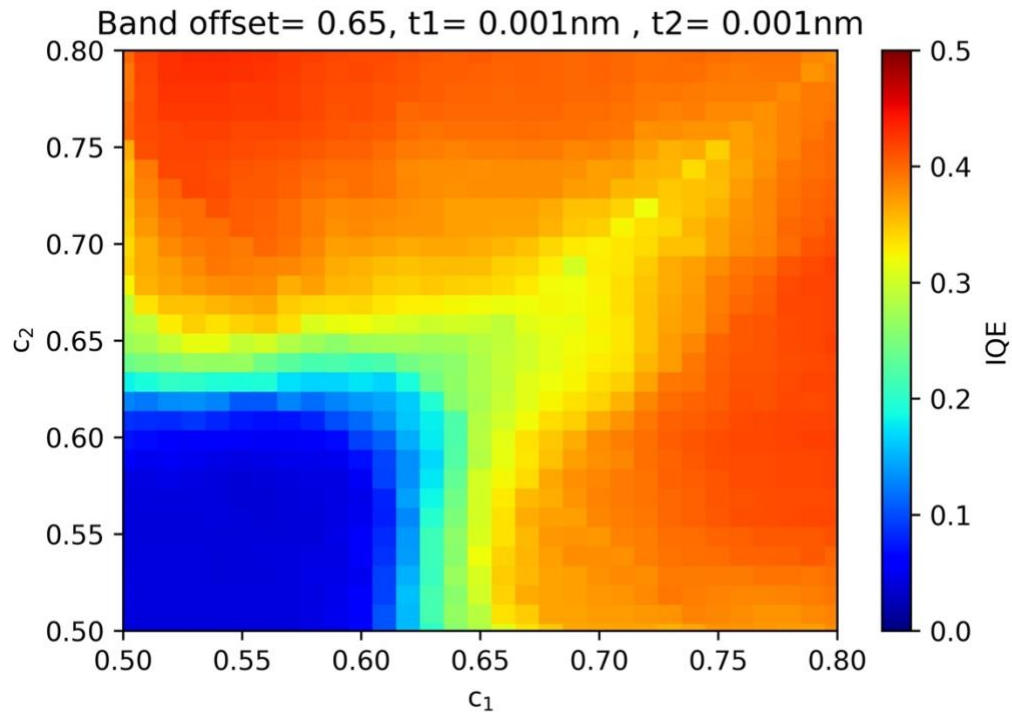



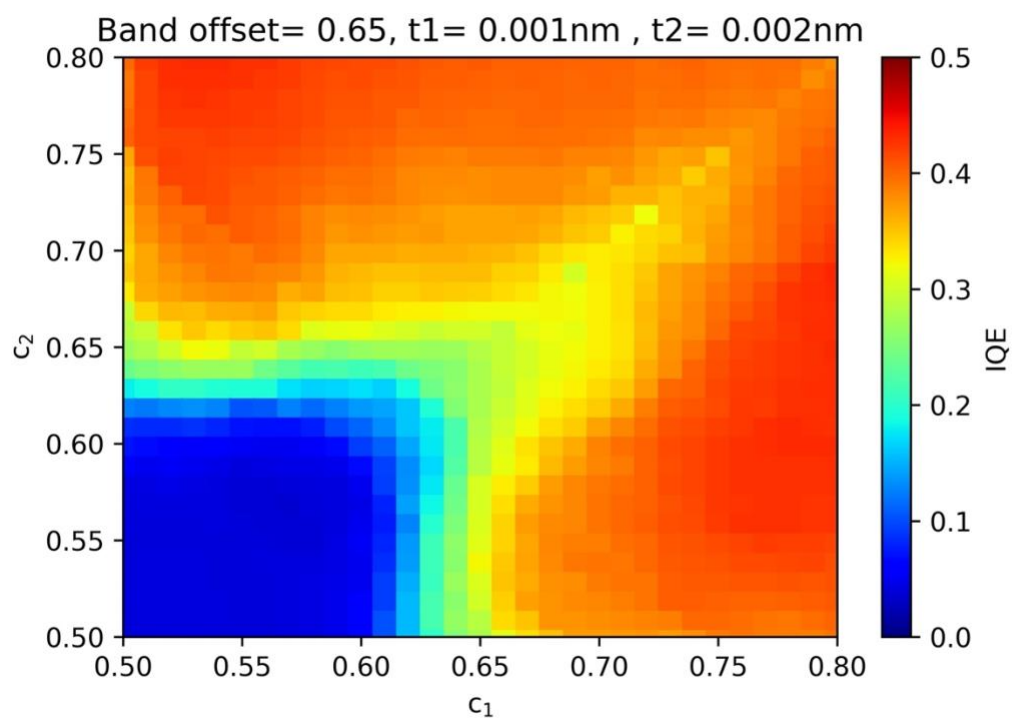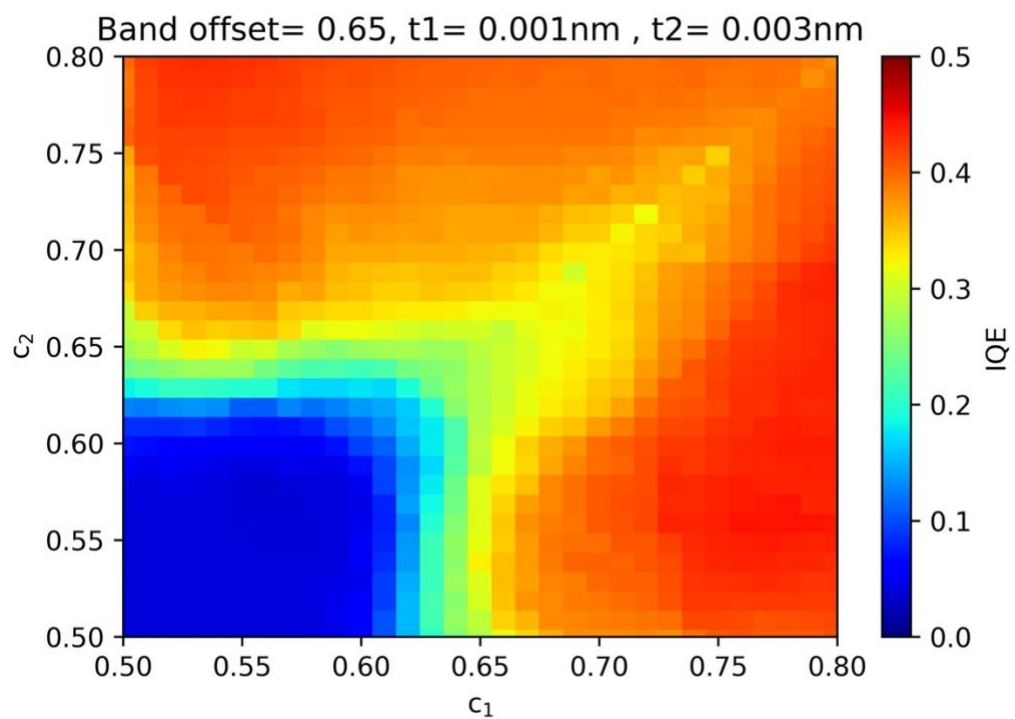

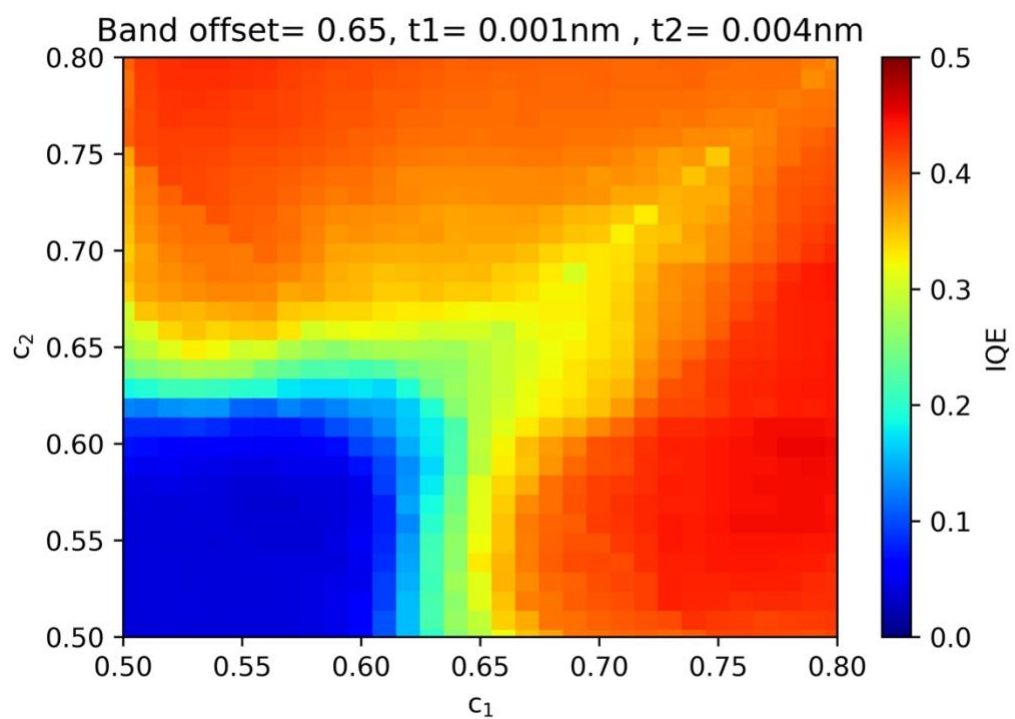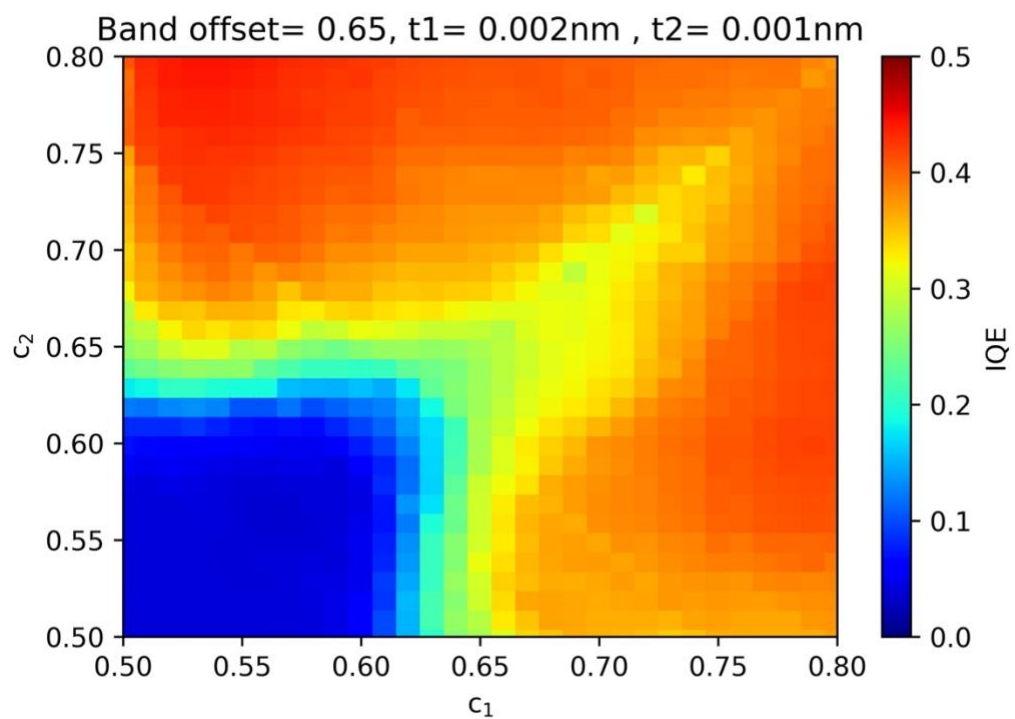

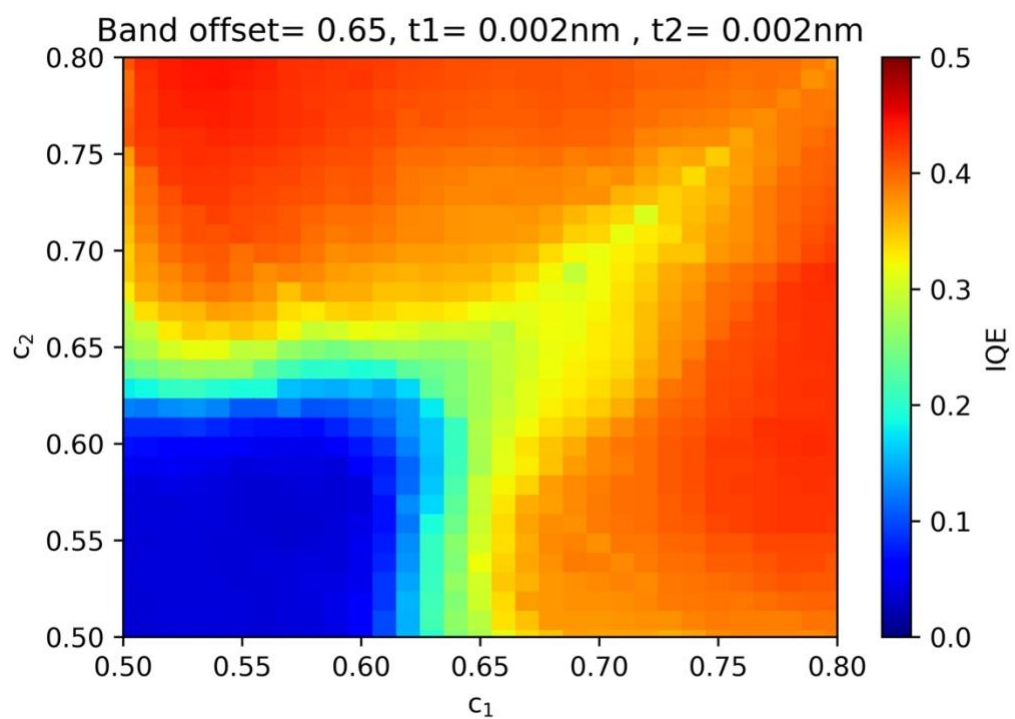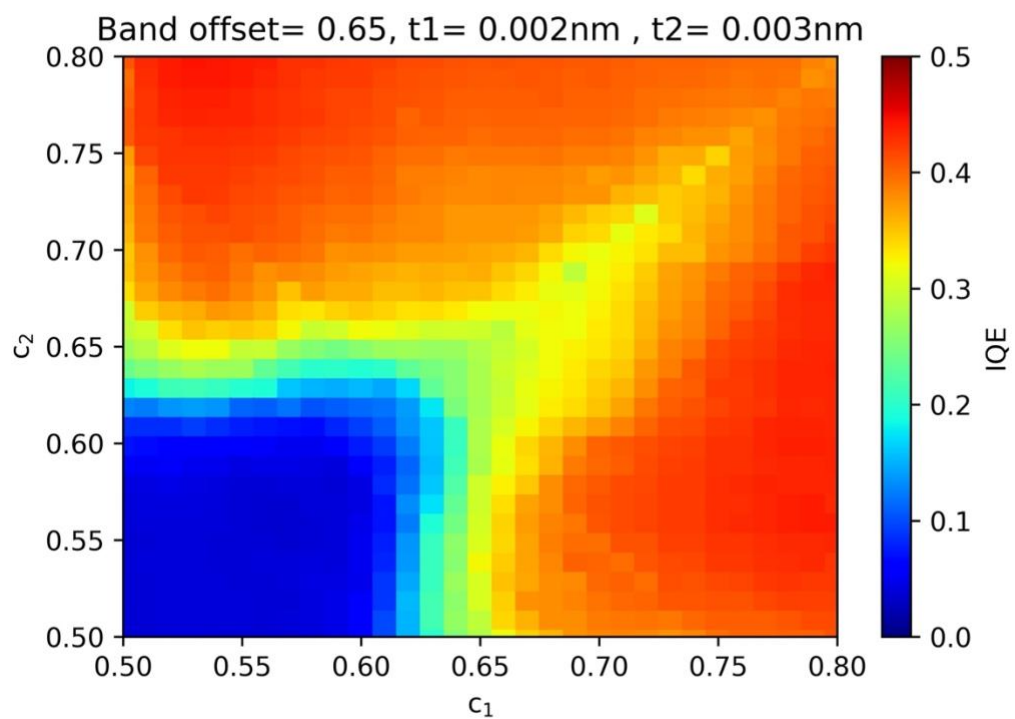

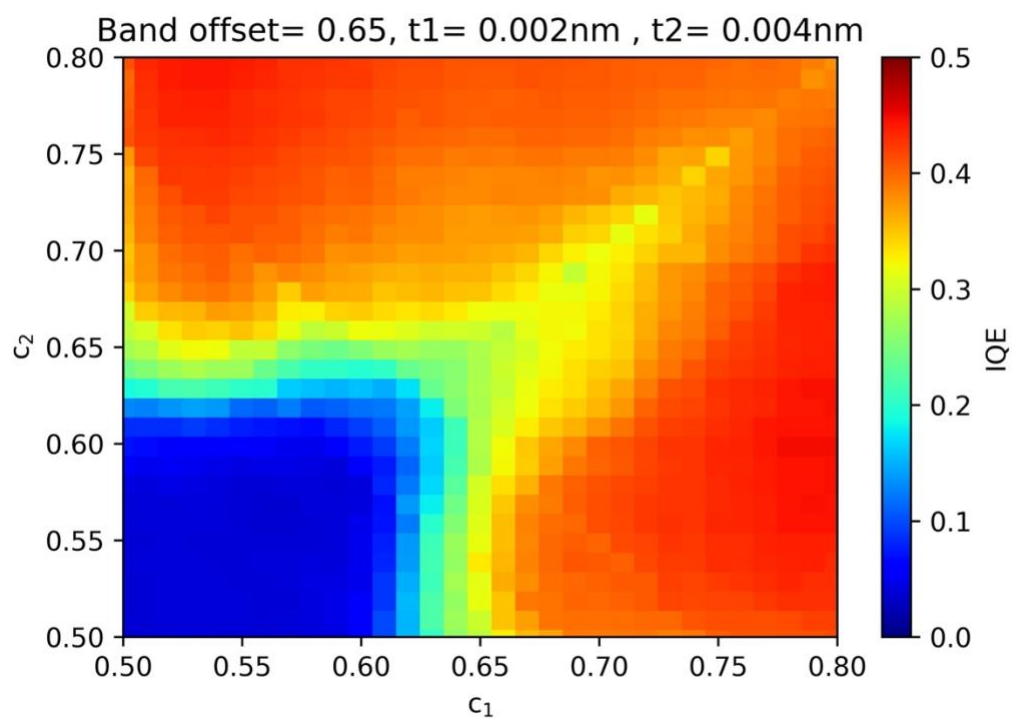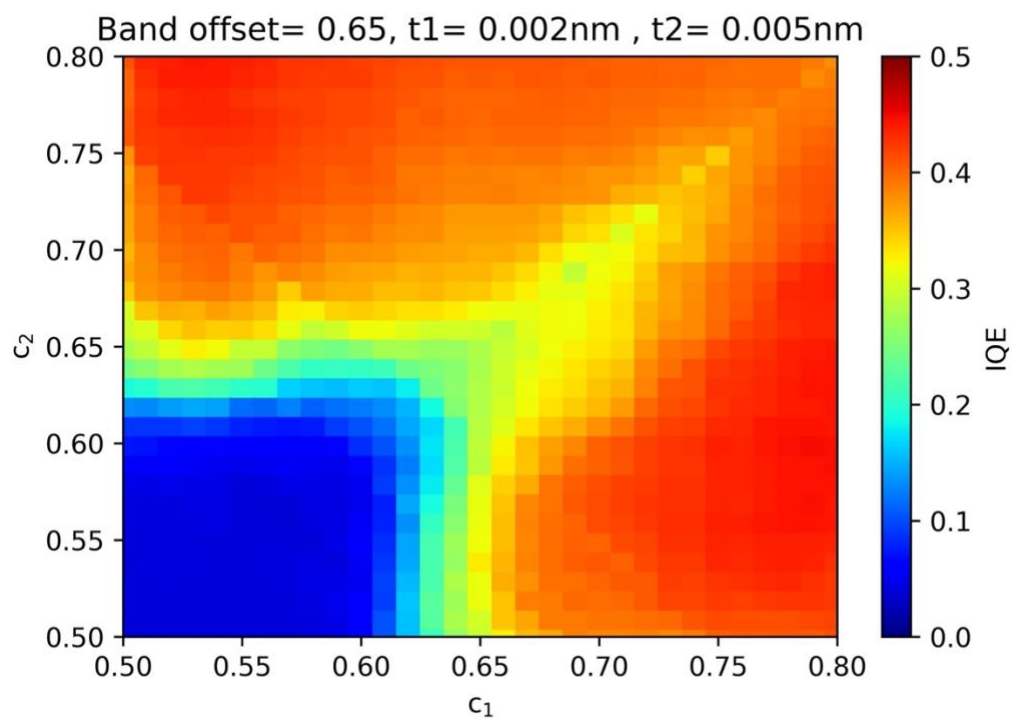

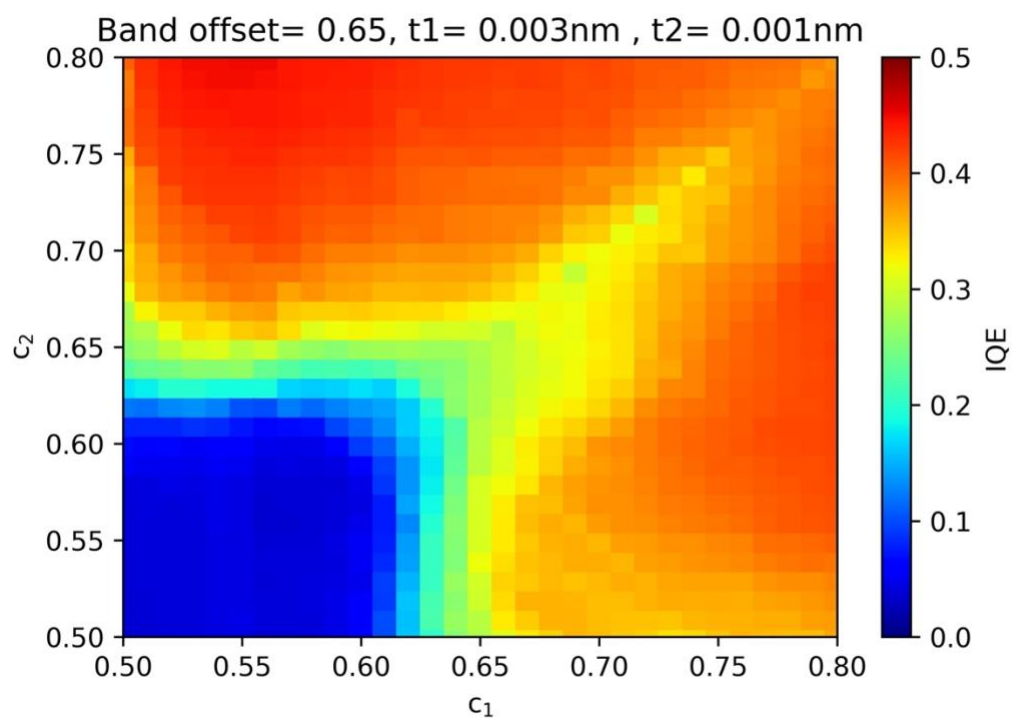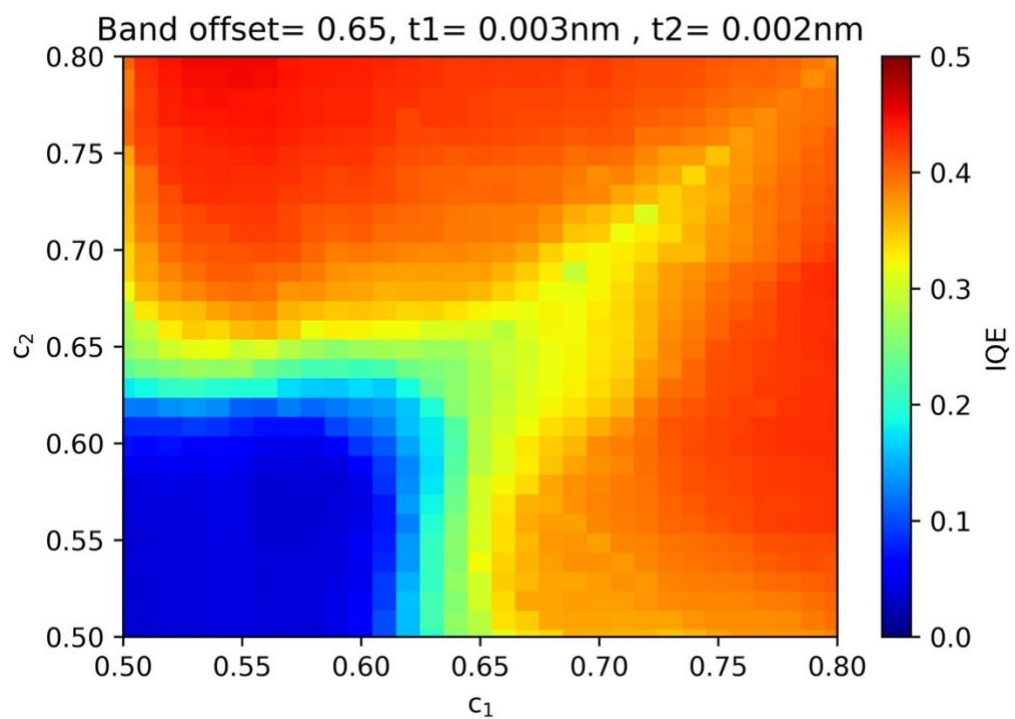



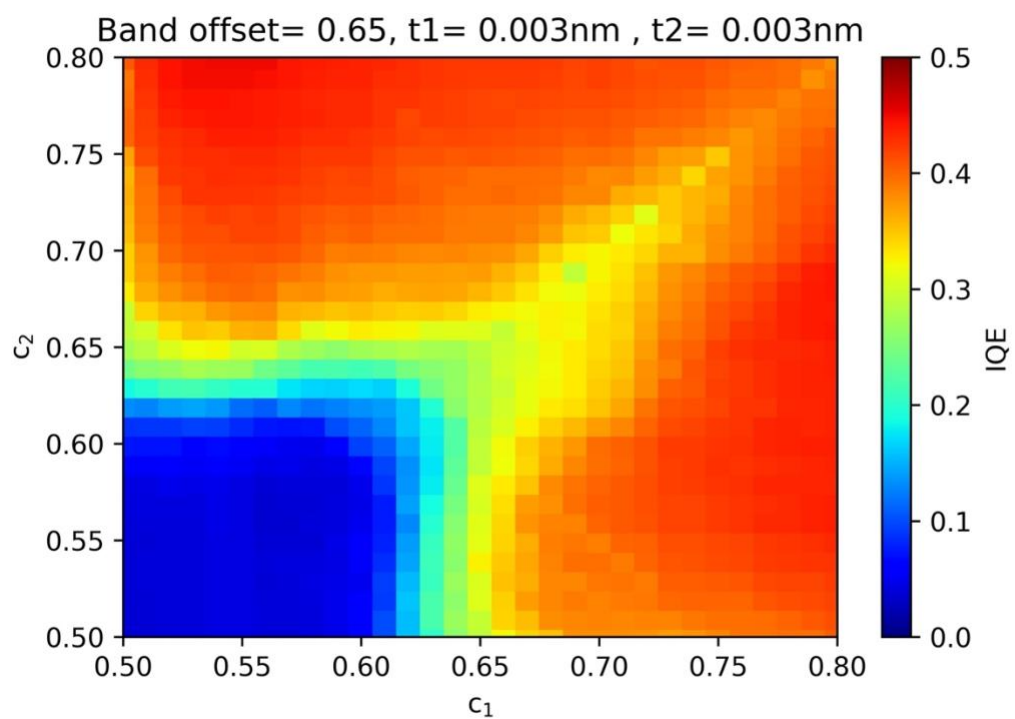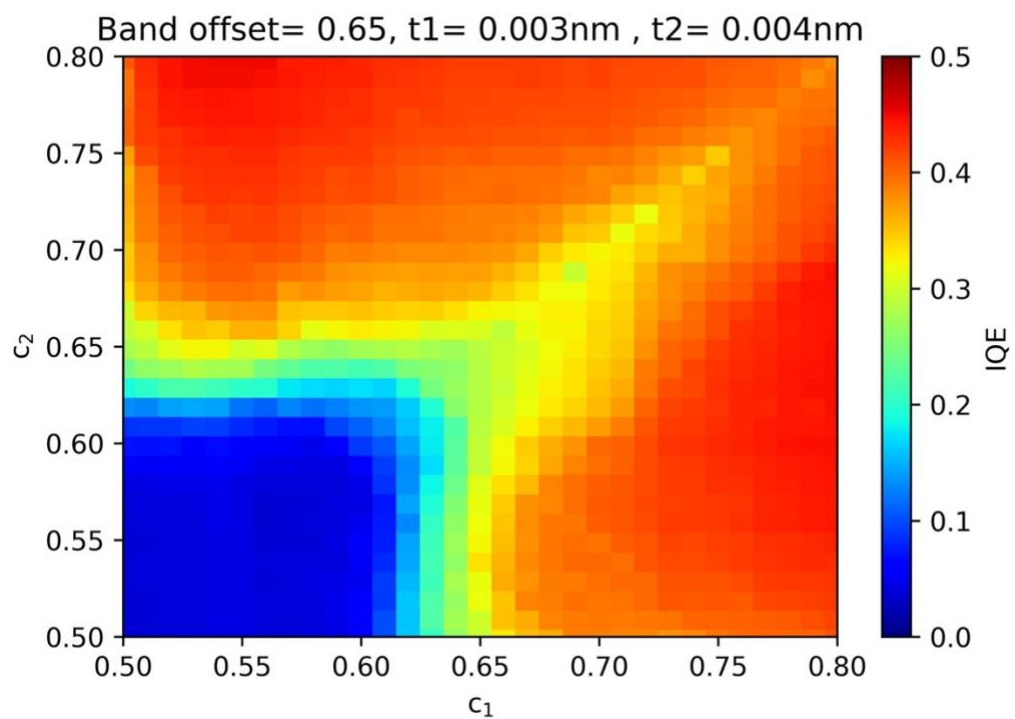

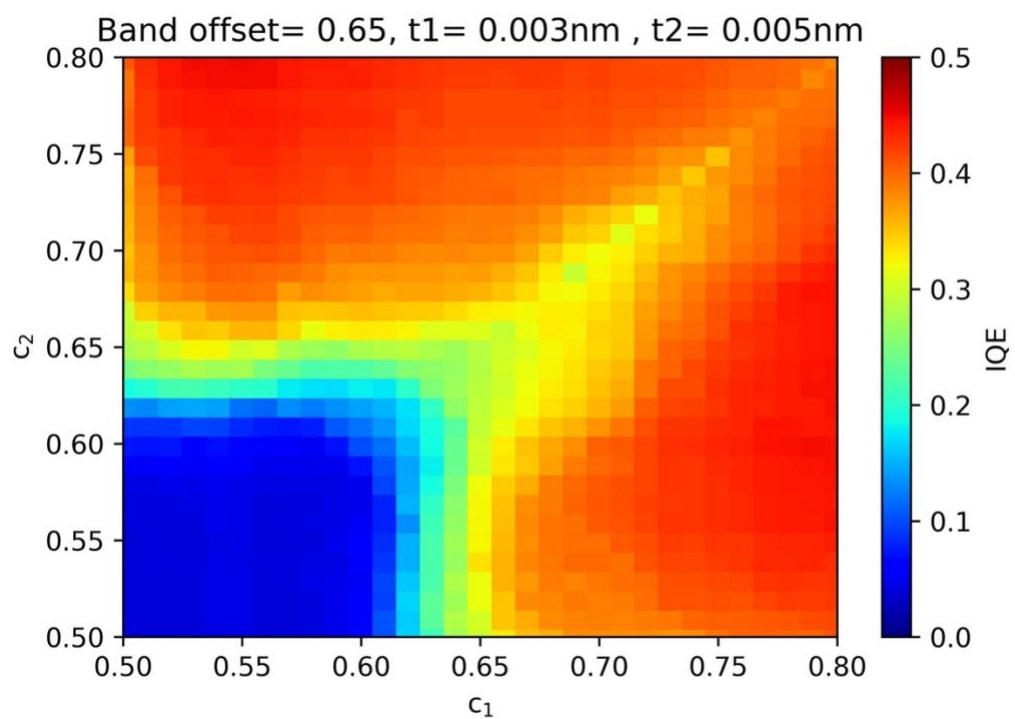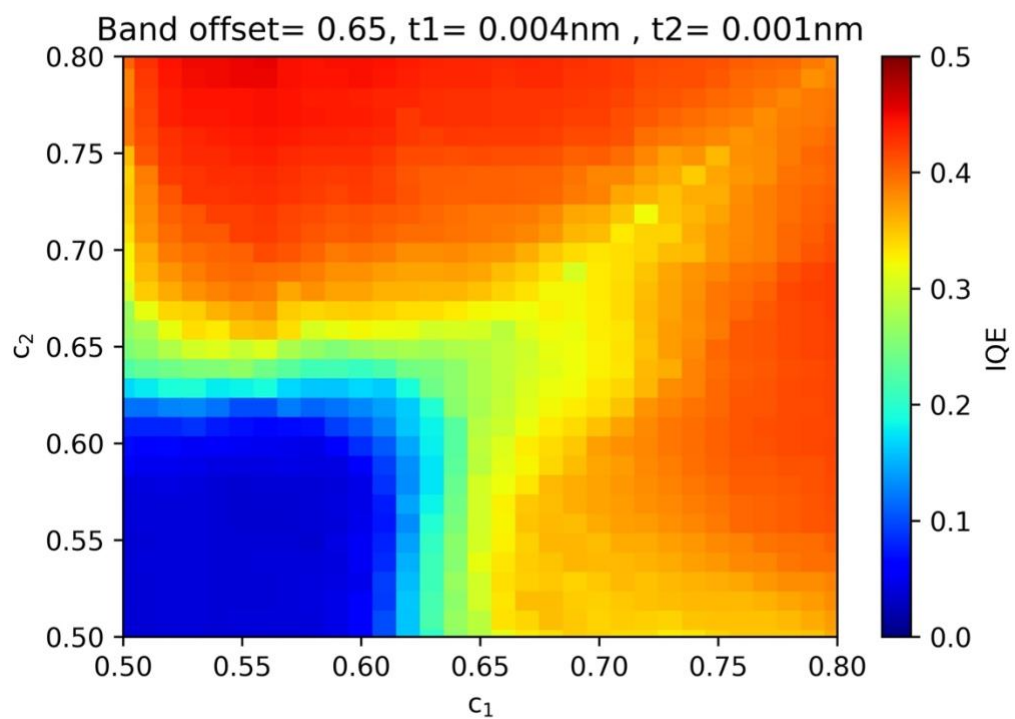

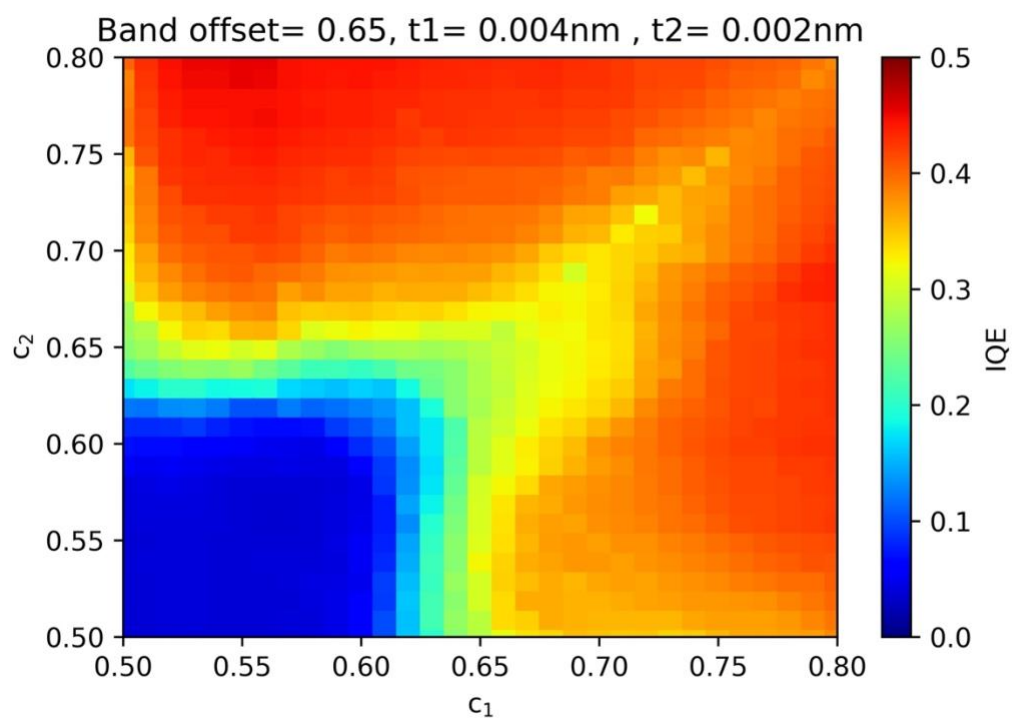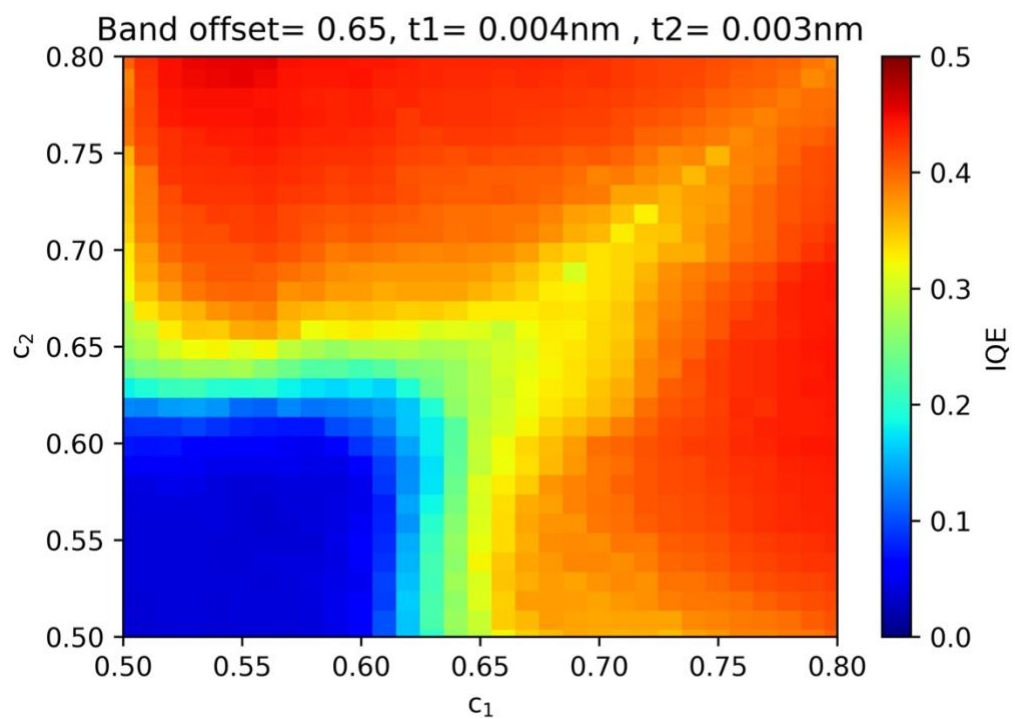

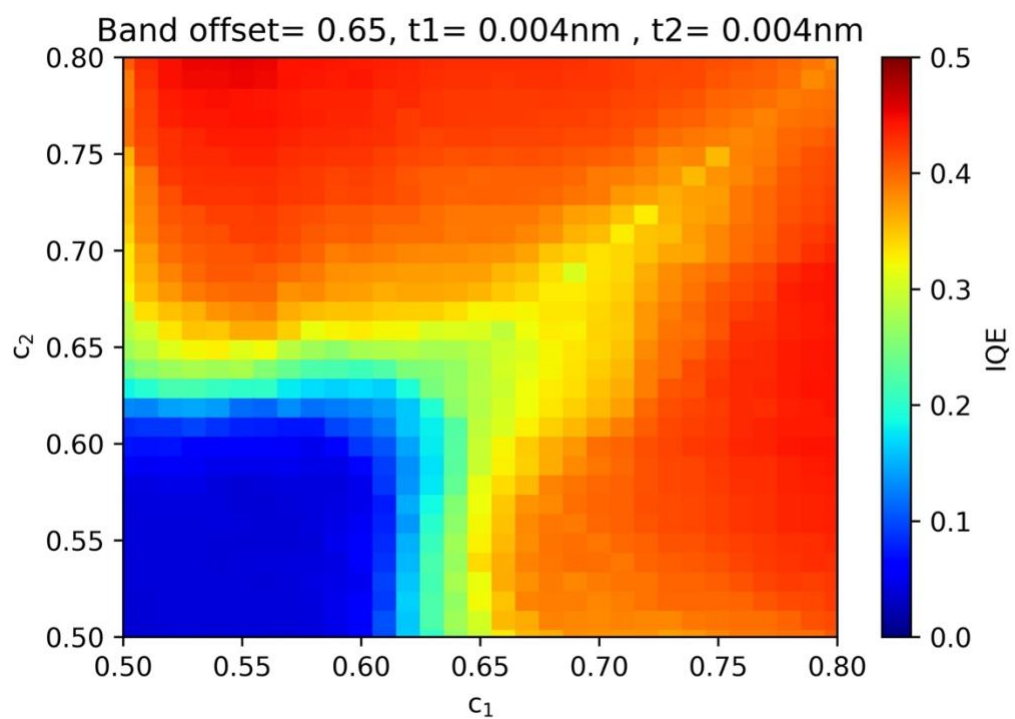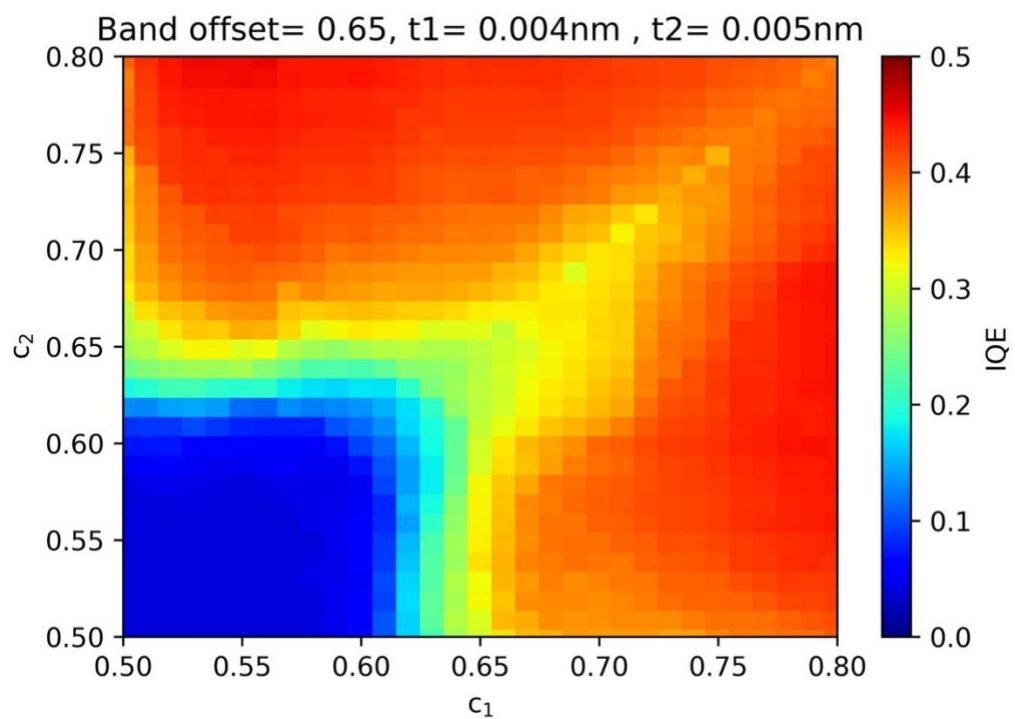

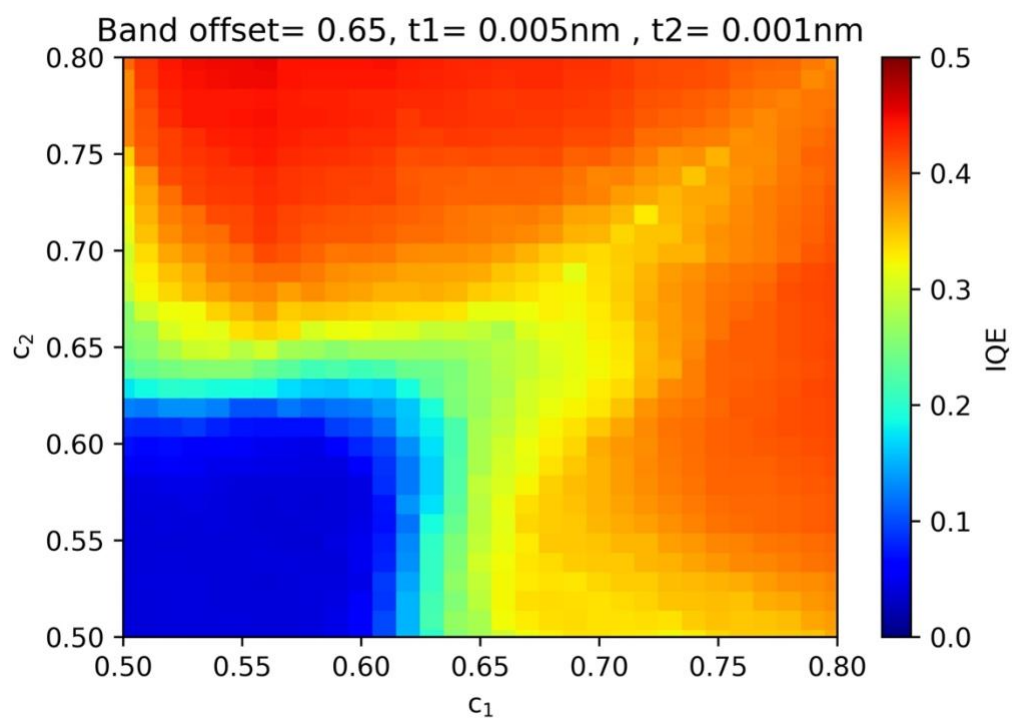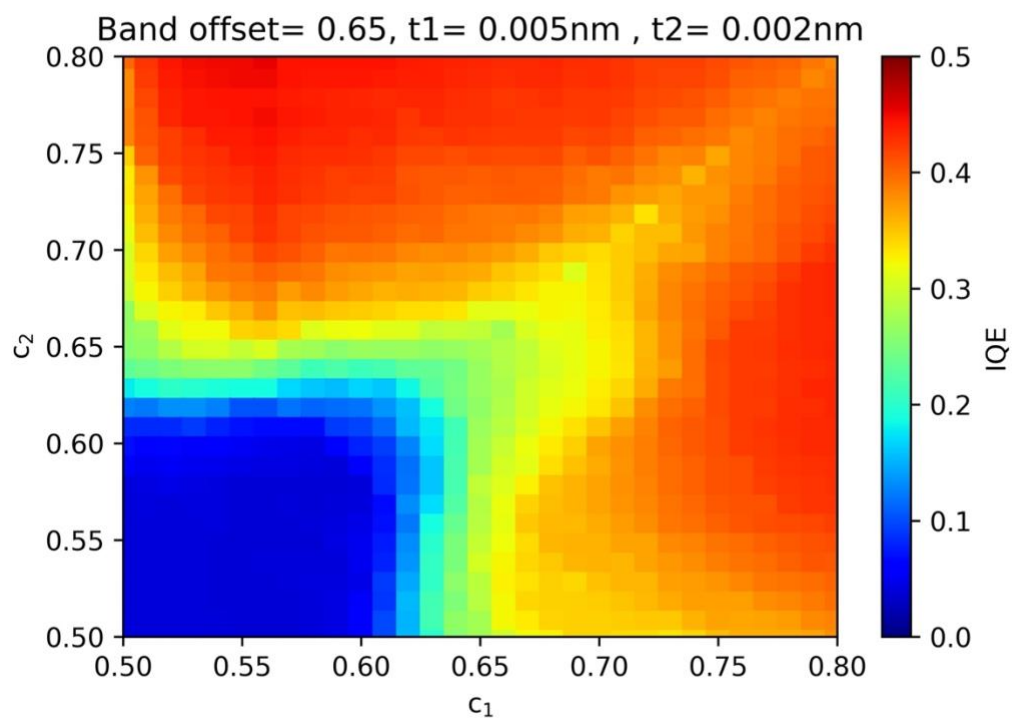



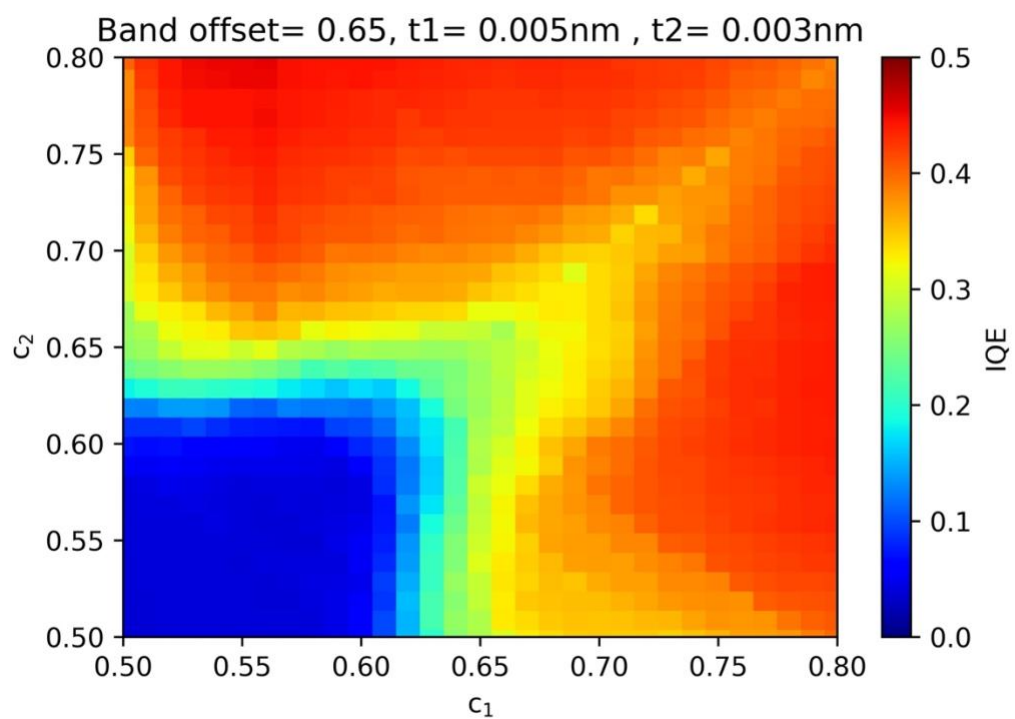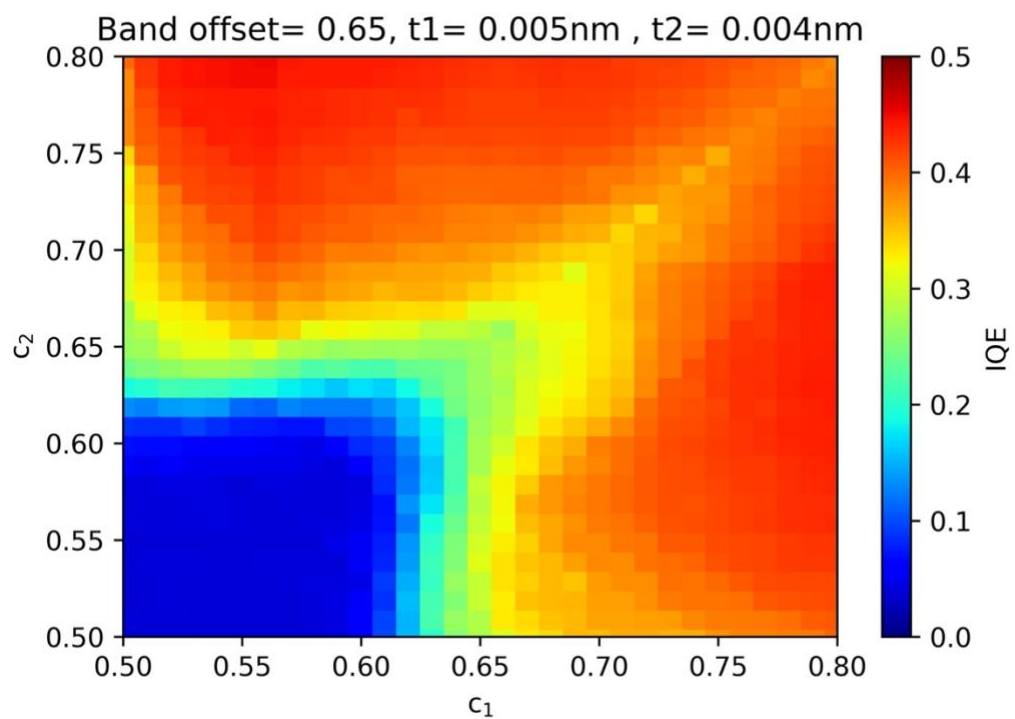

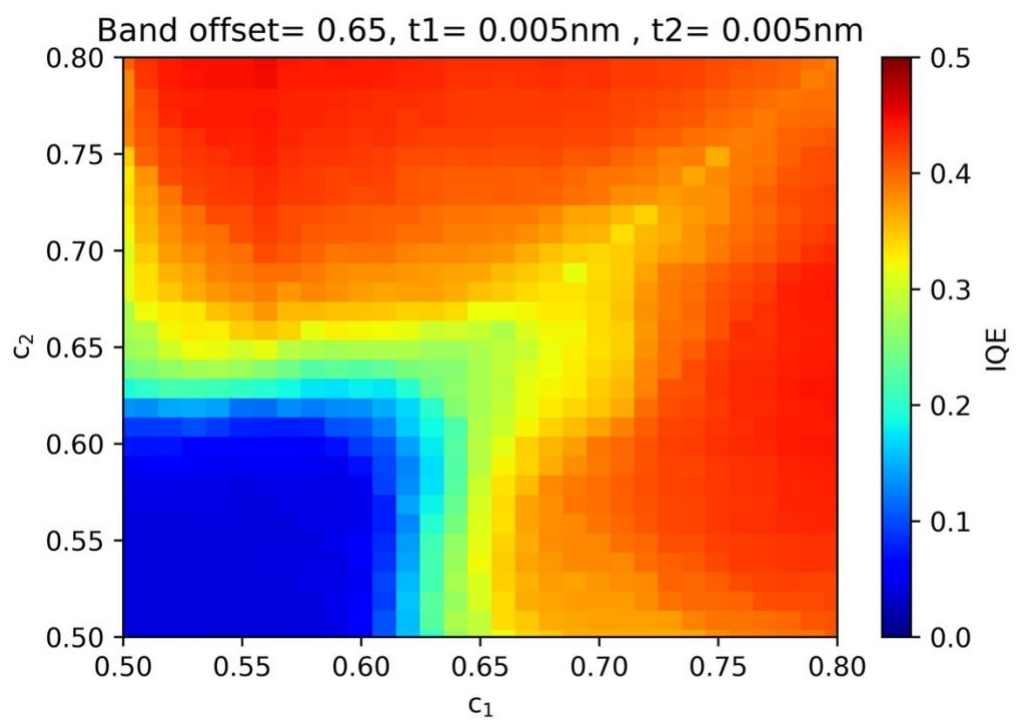

**S4. Internal quantum efficiency (IQE) predictions from stacked XGBoost/LightGBM model of superlattice (SL) electron blocking layer (EBL) with different composition combinations under the band offset ratio = 0.7.**

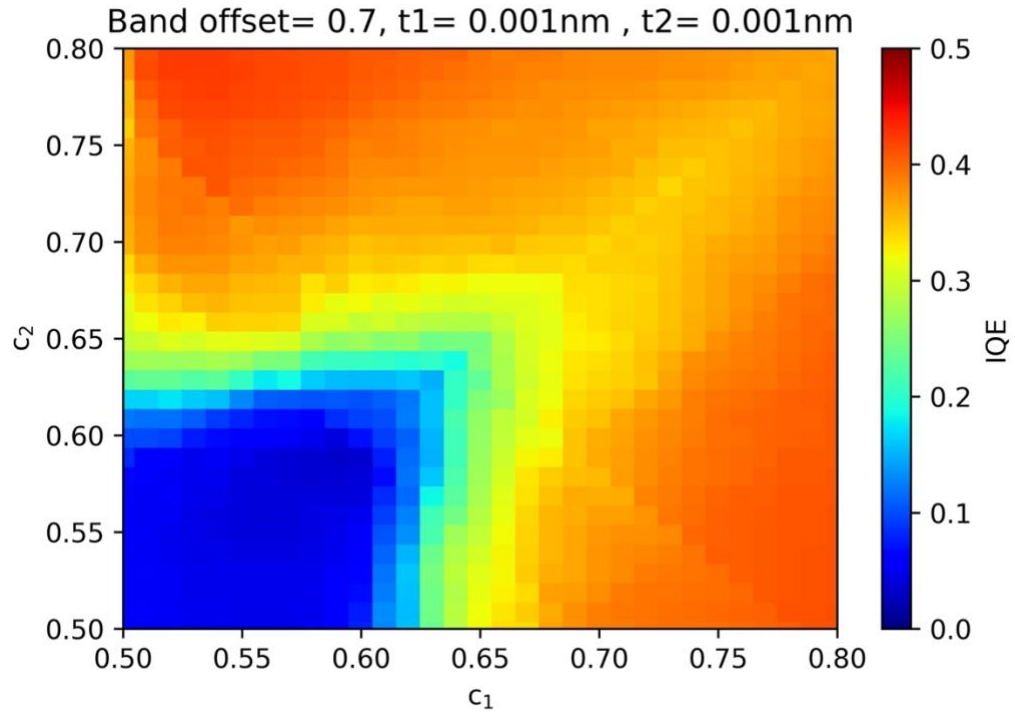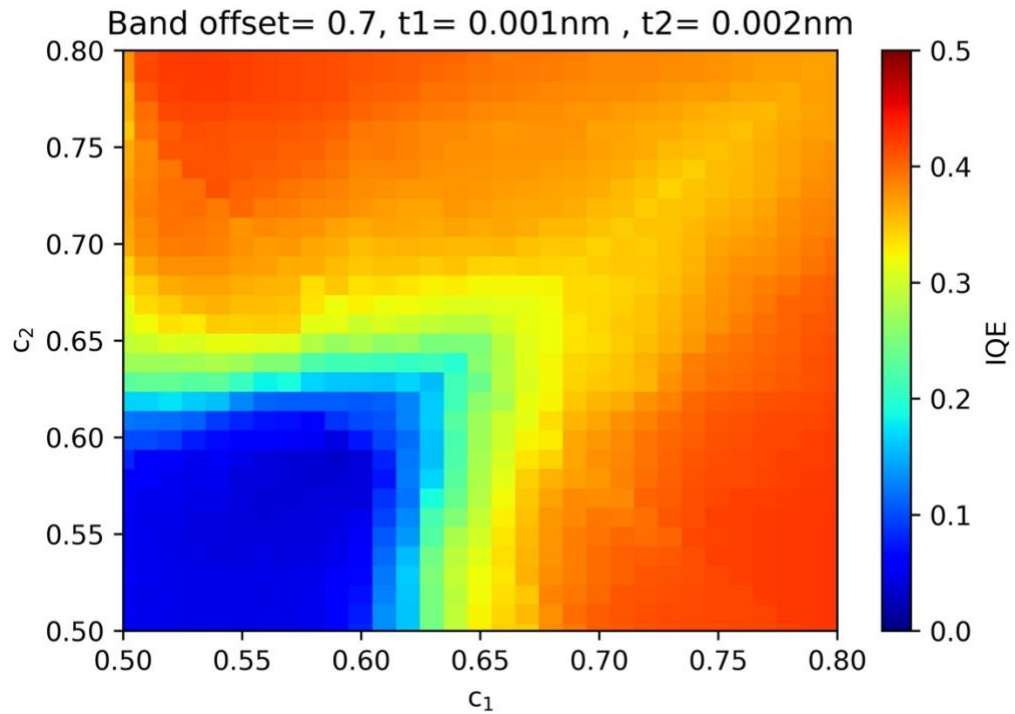

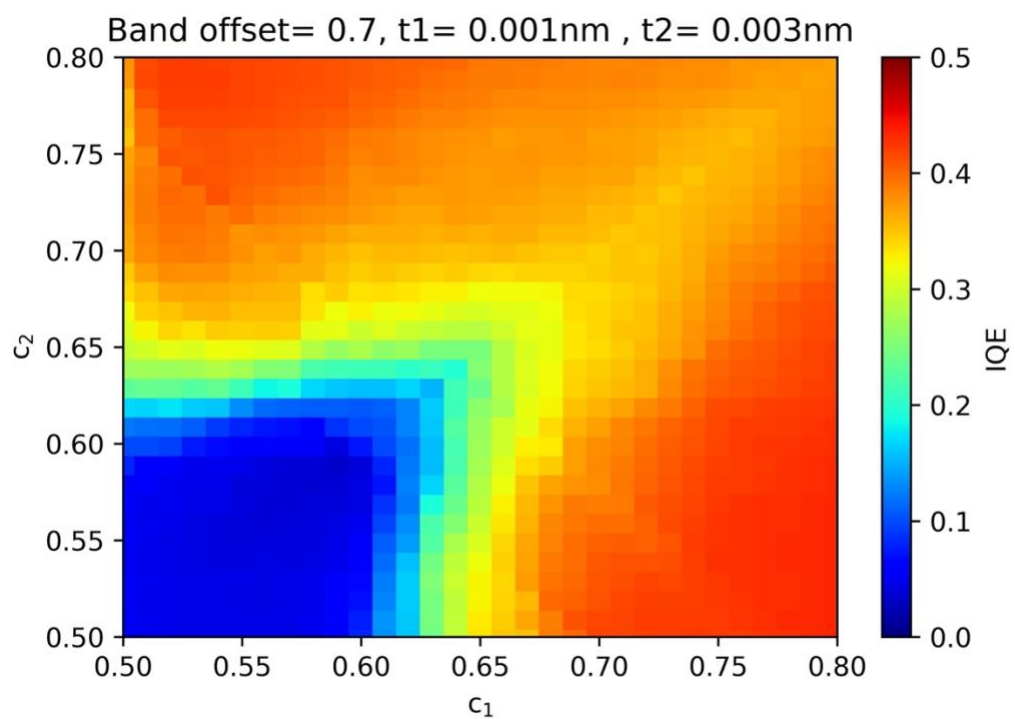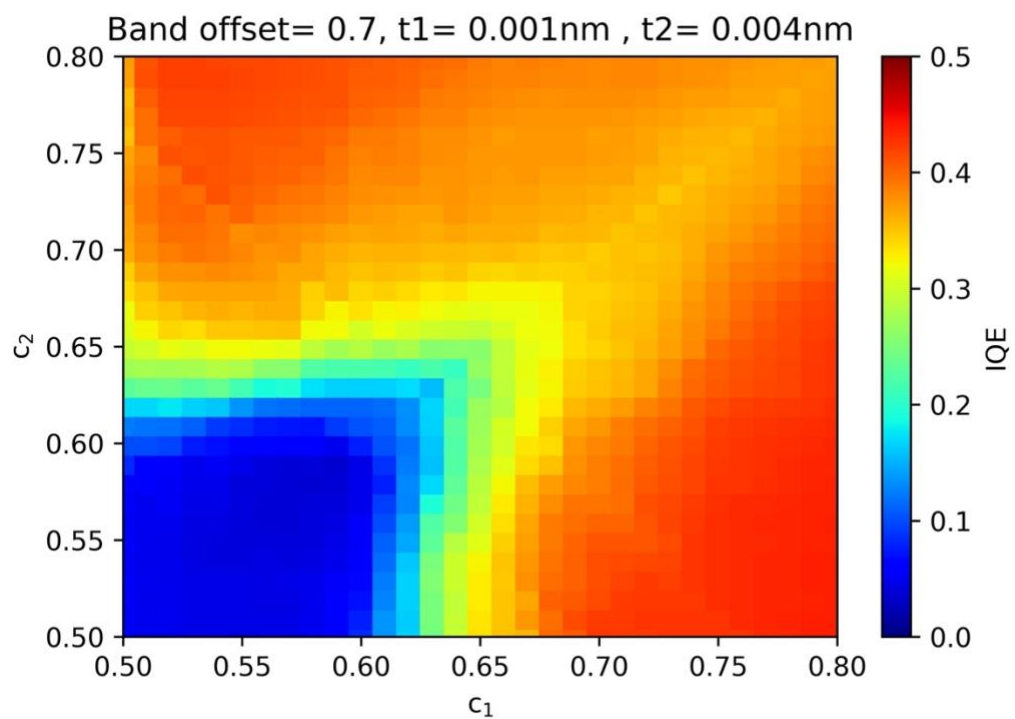

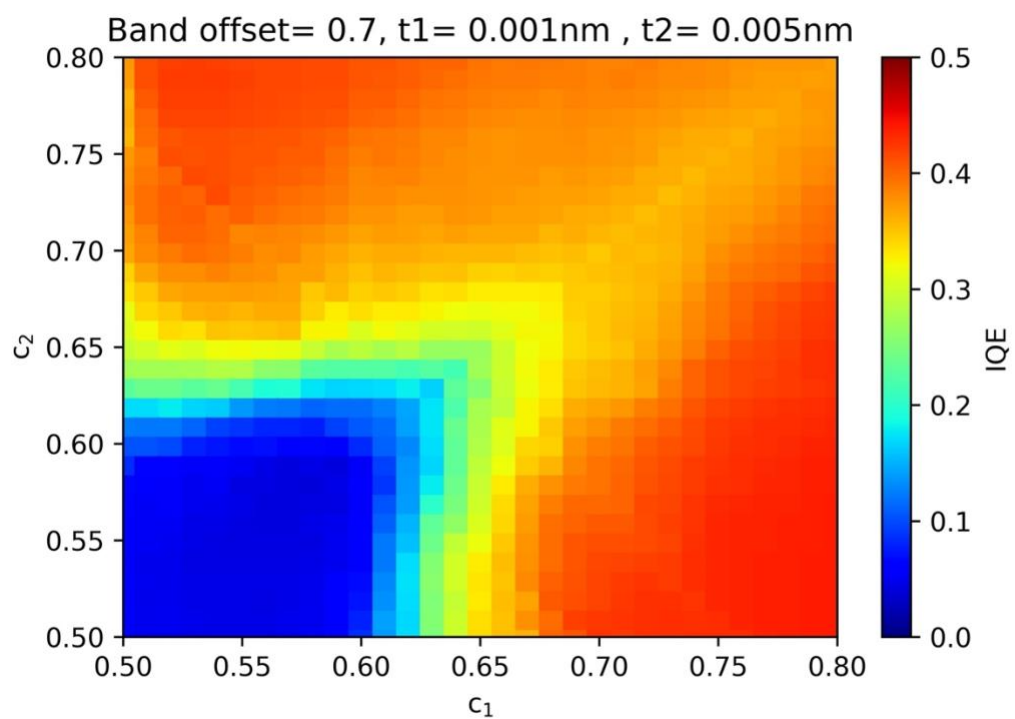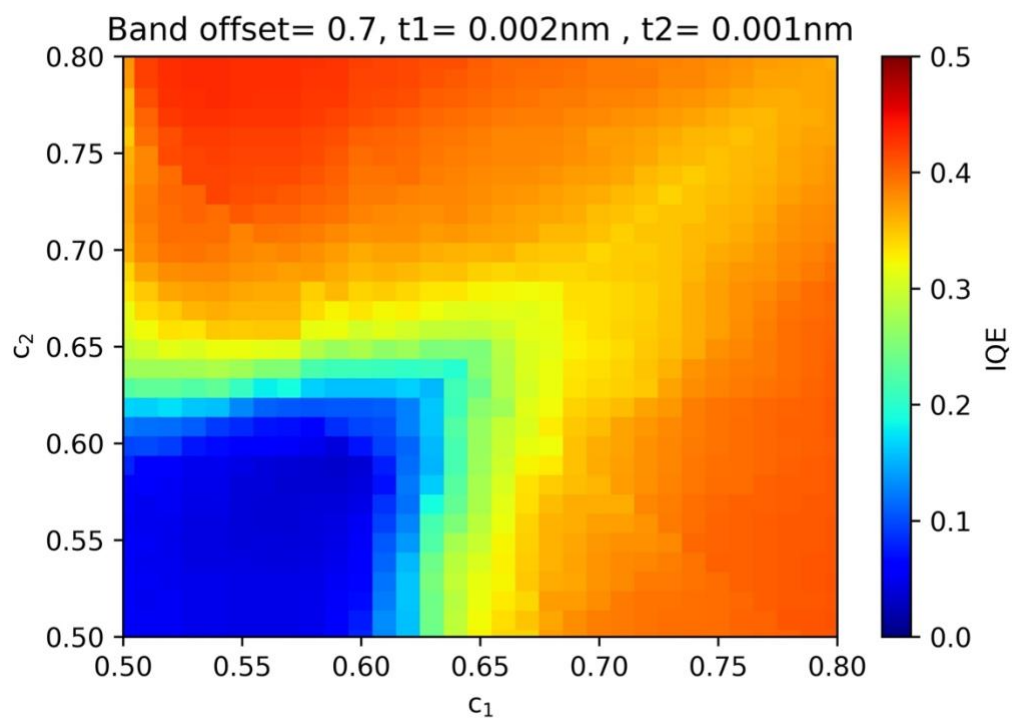



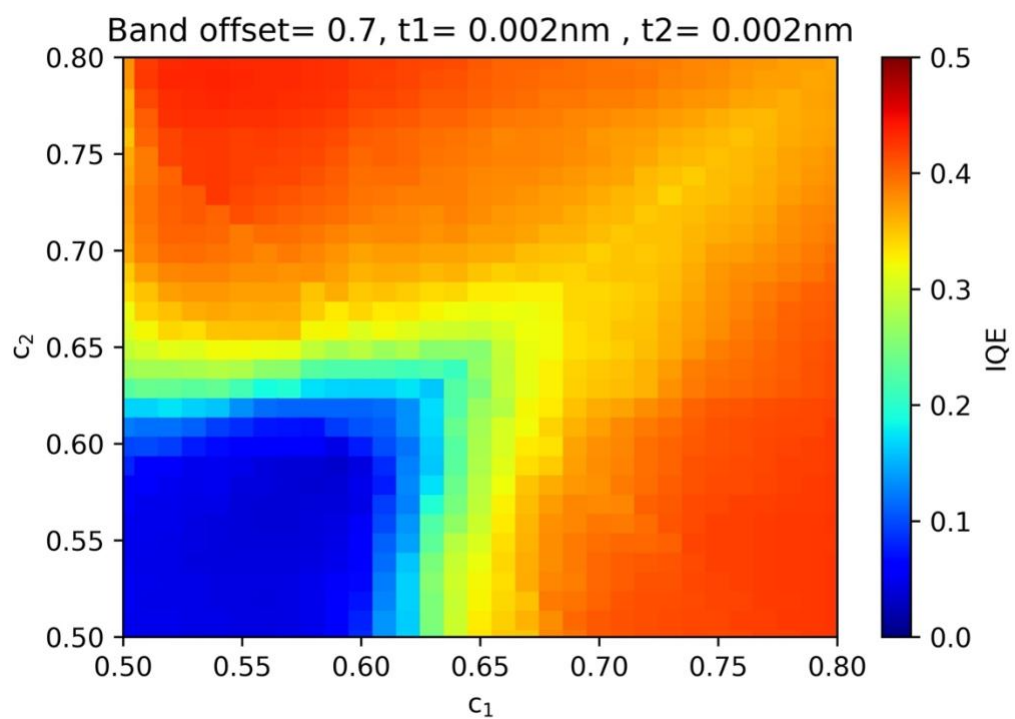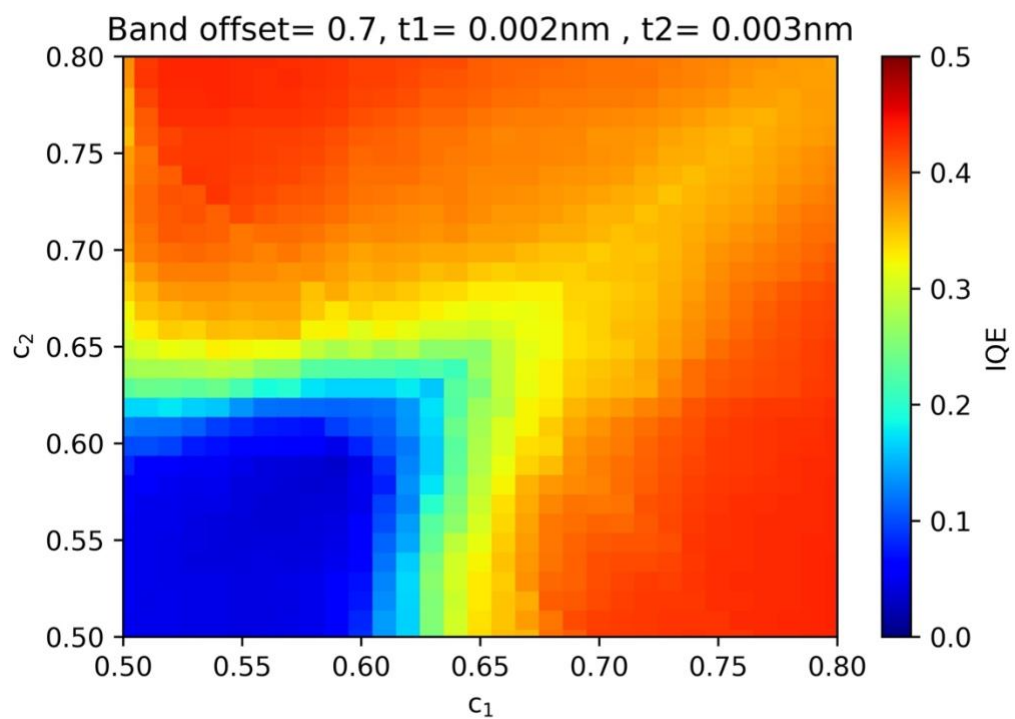

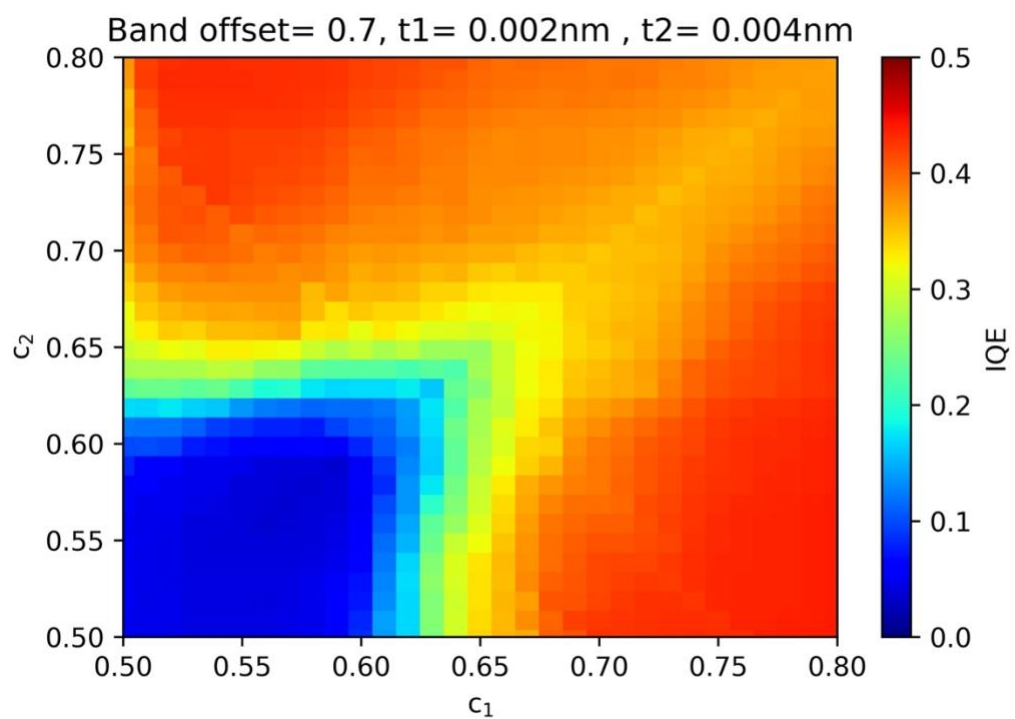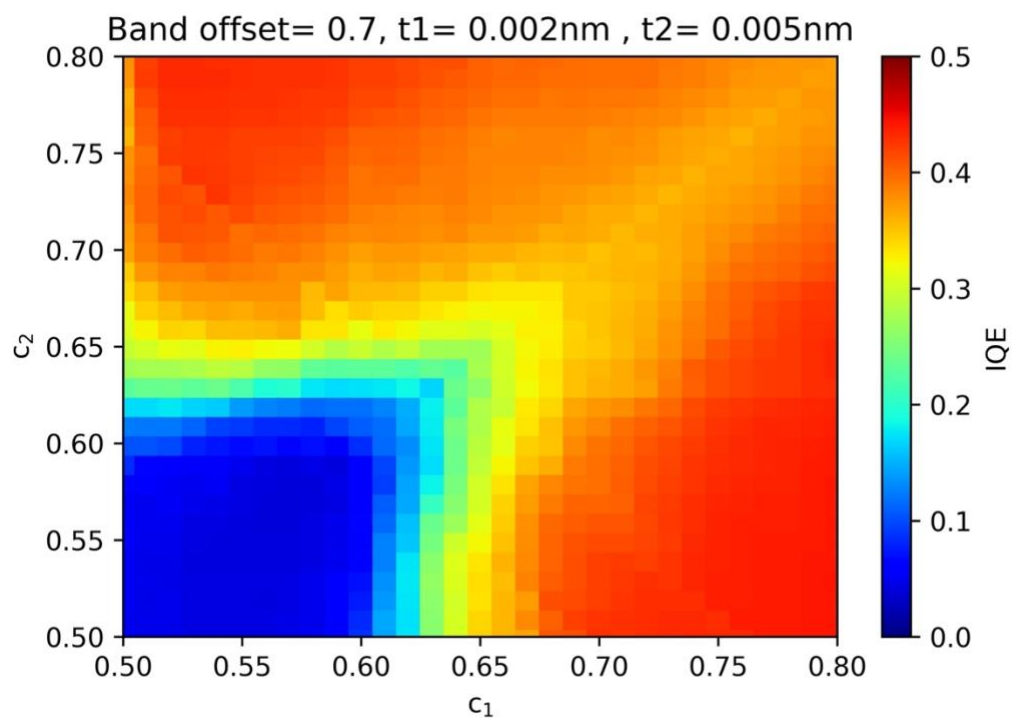

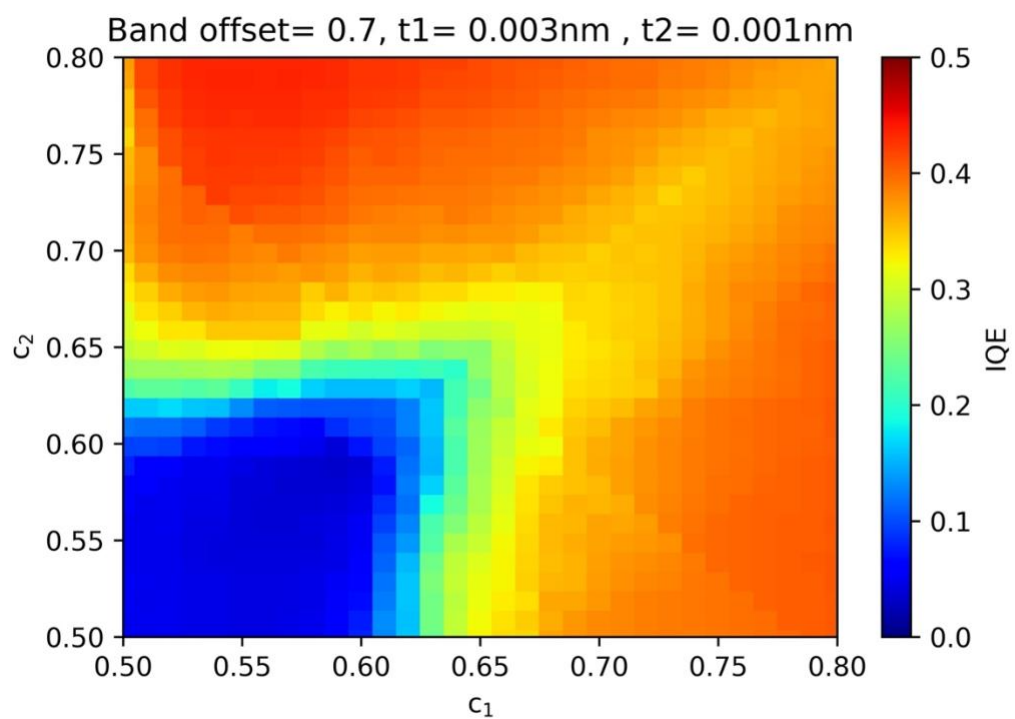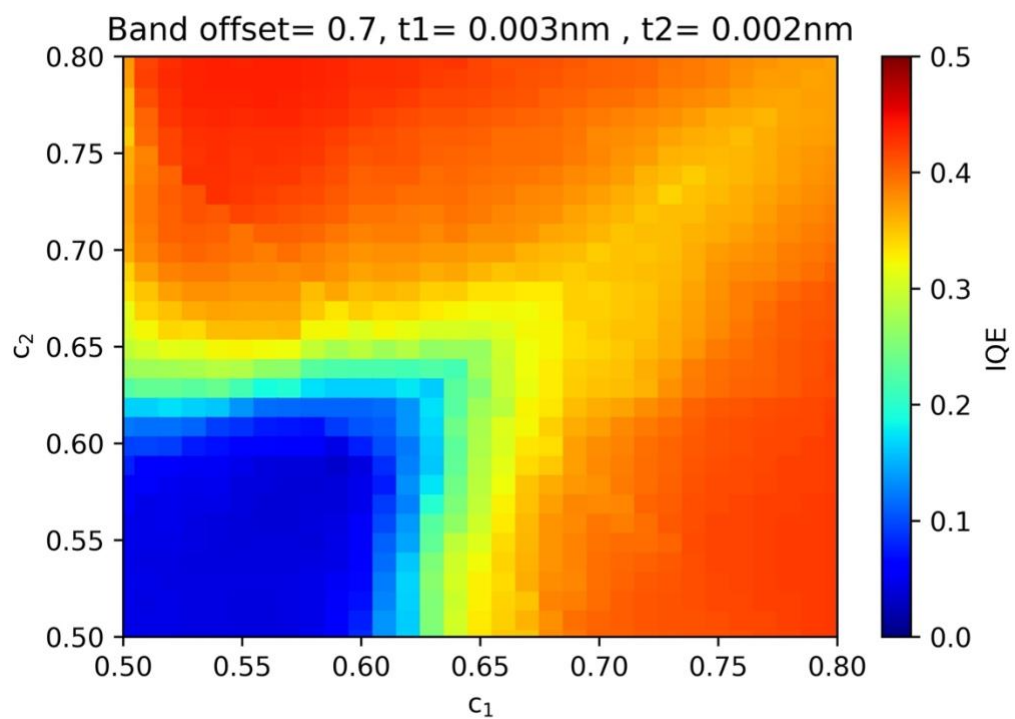

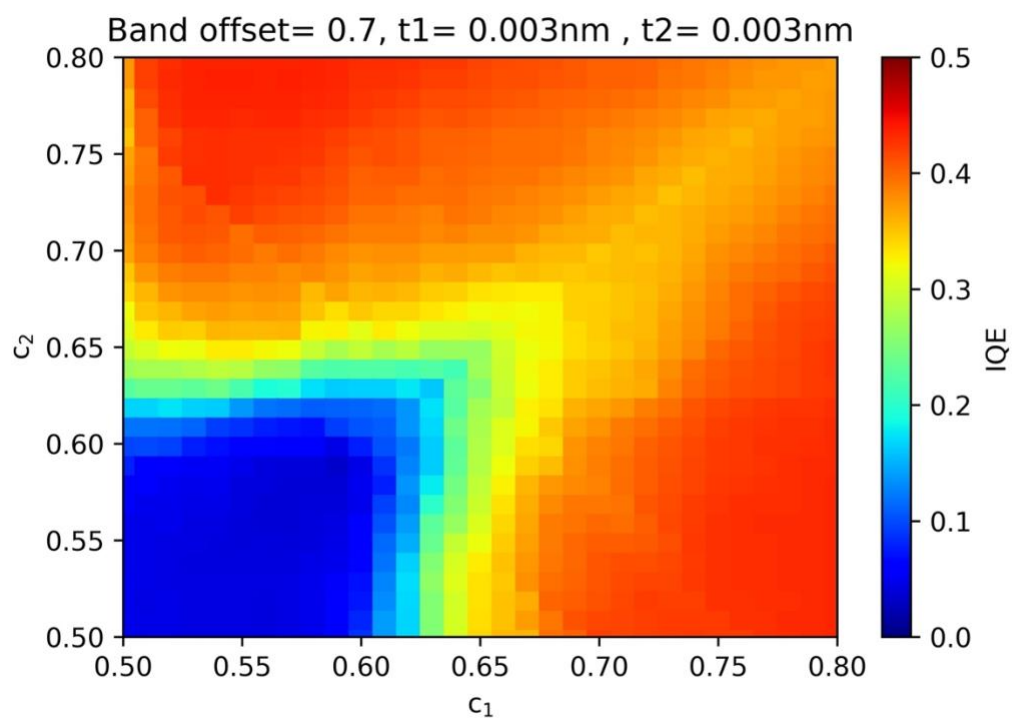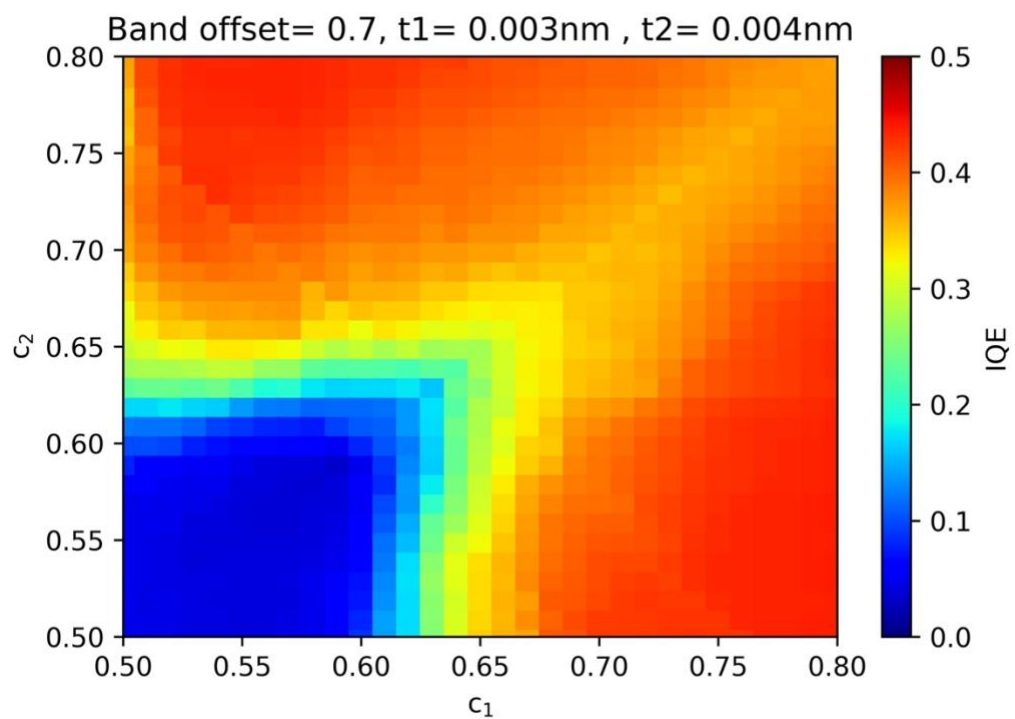

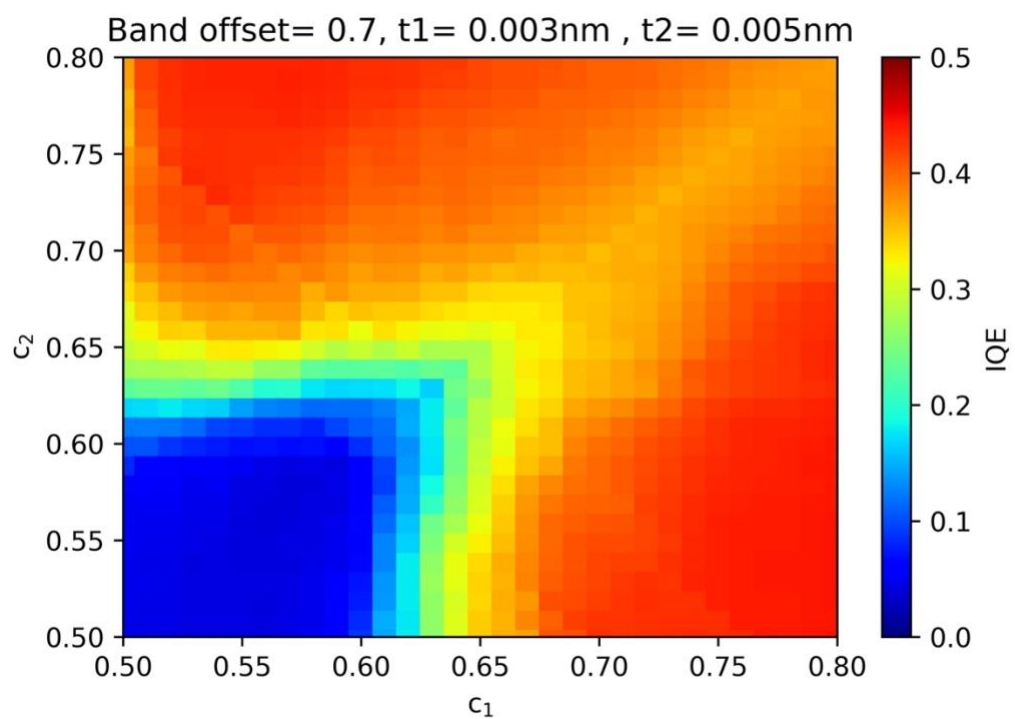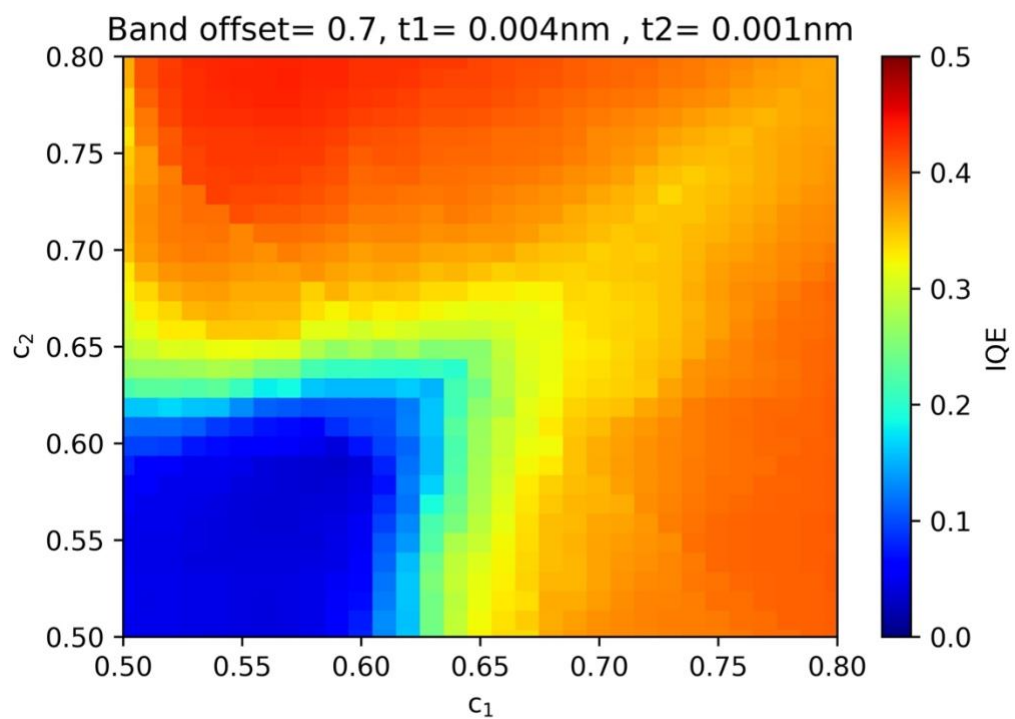

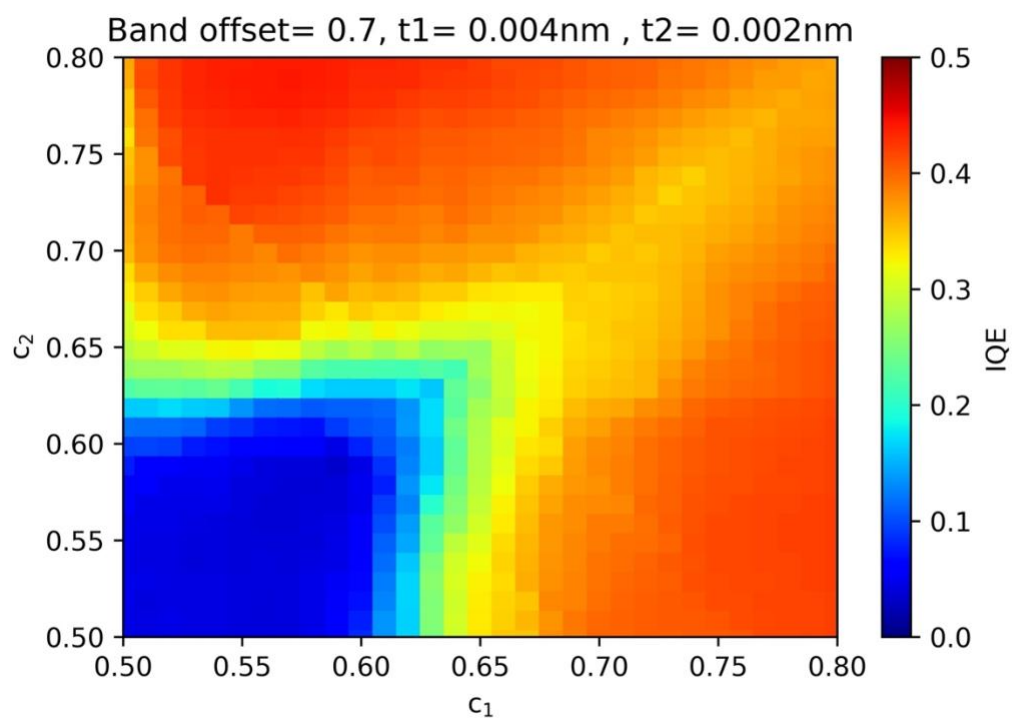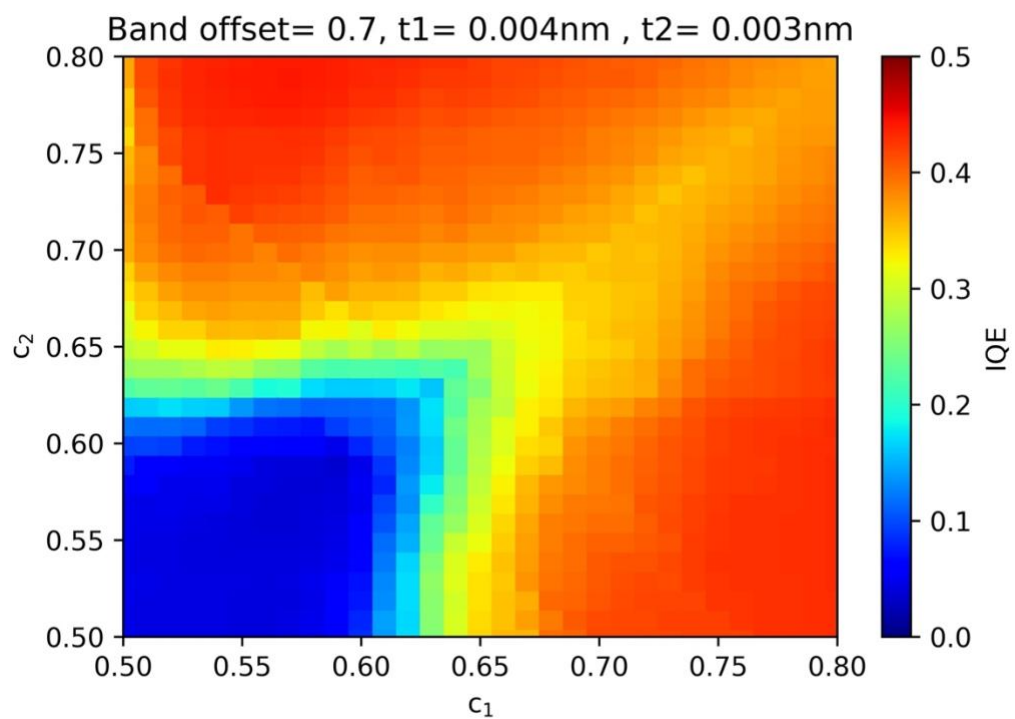



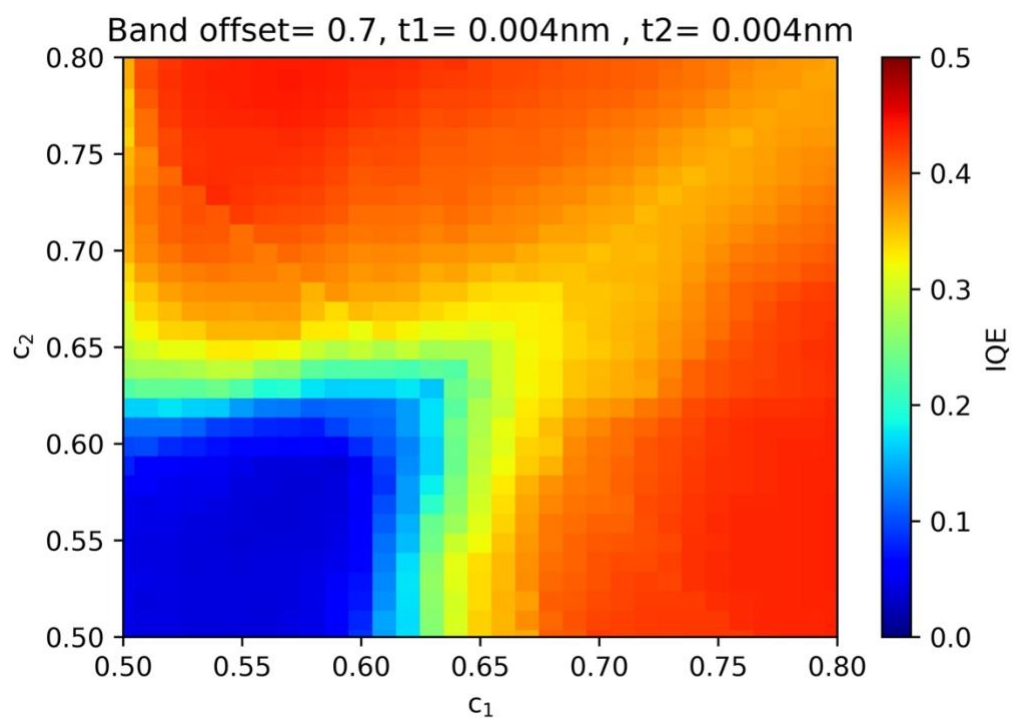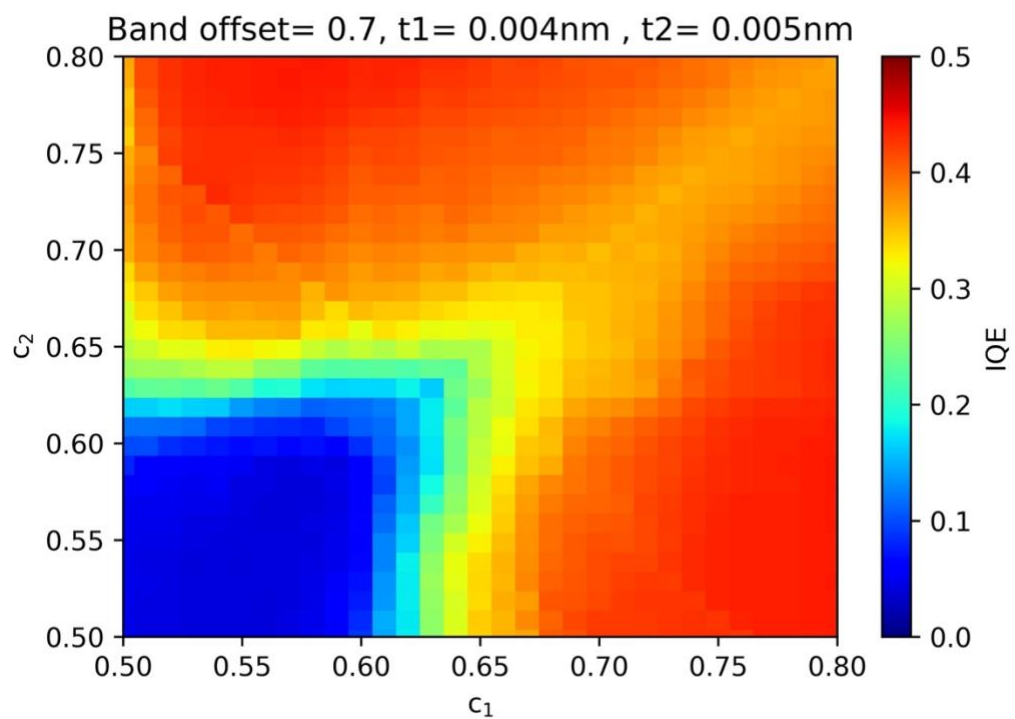

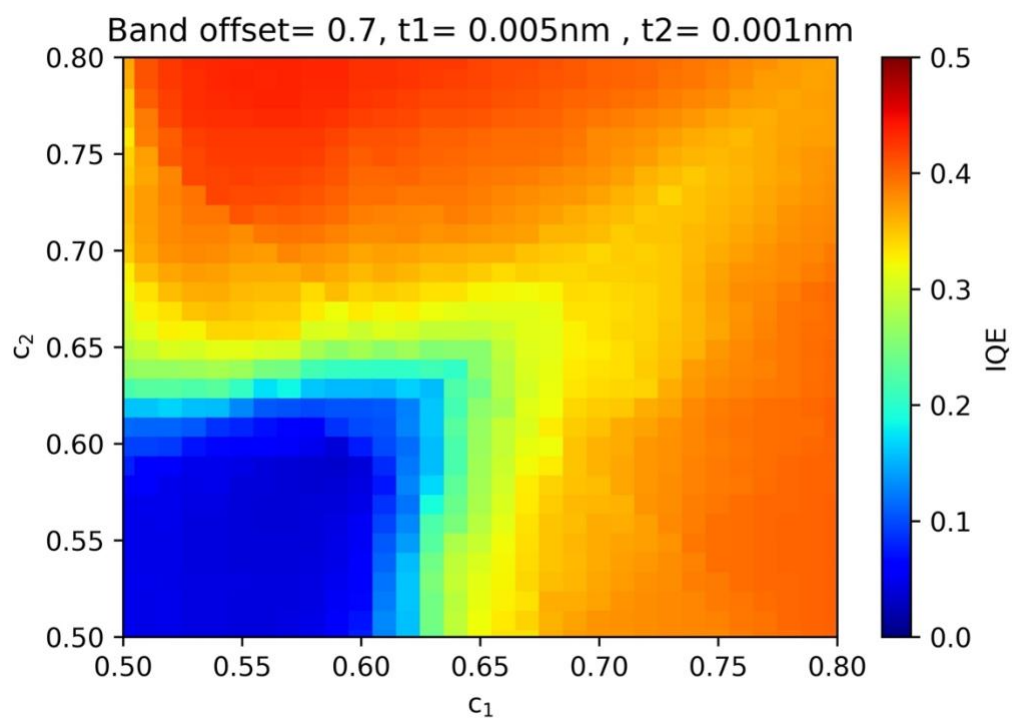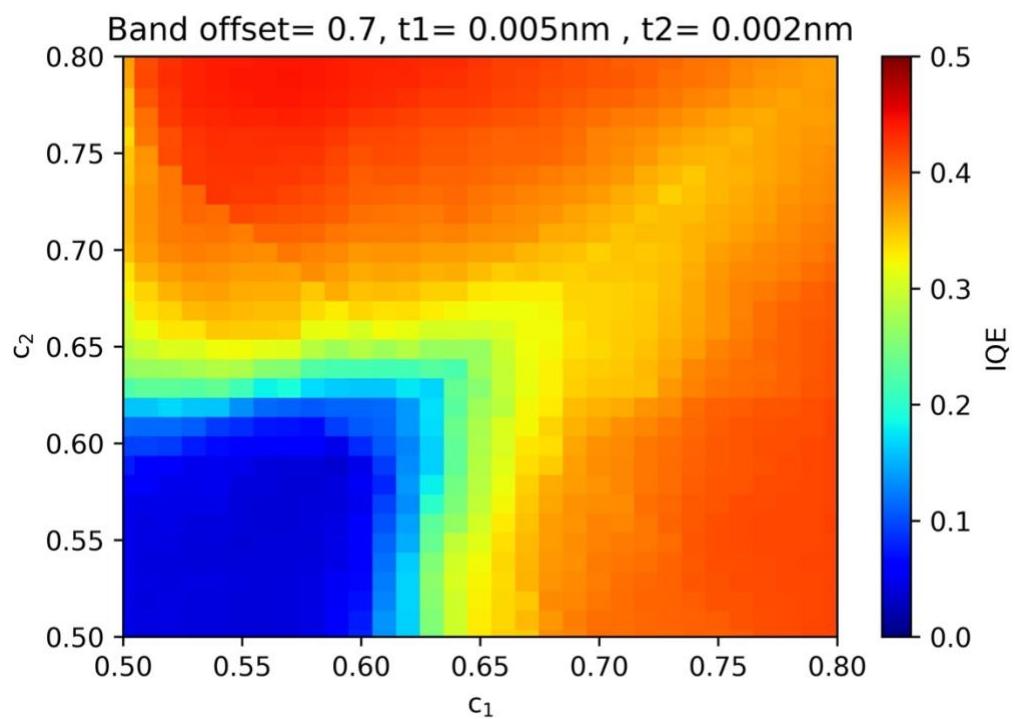

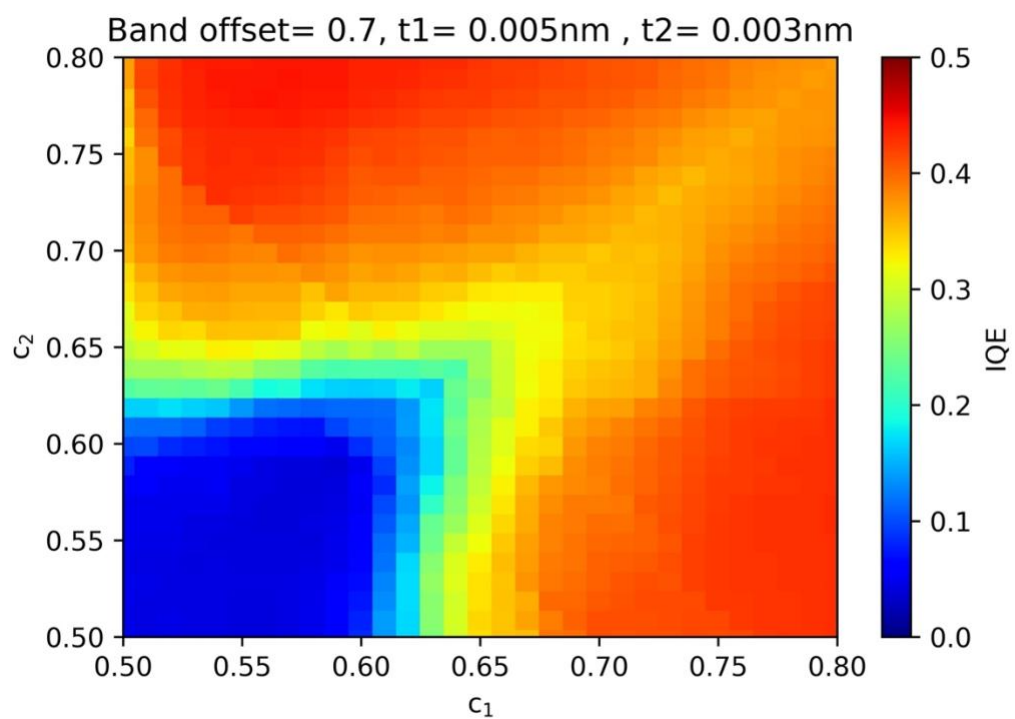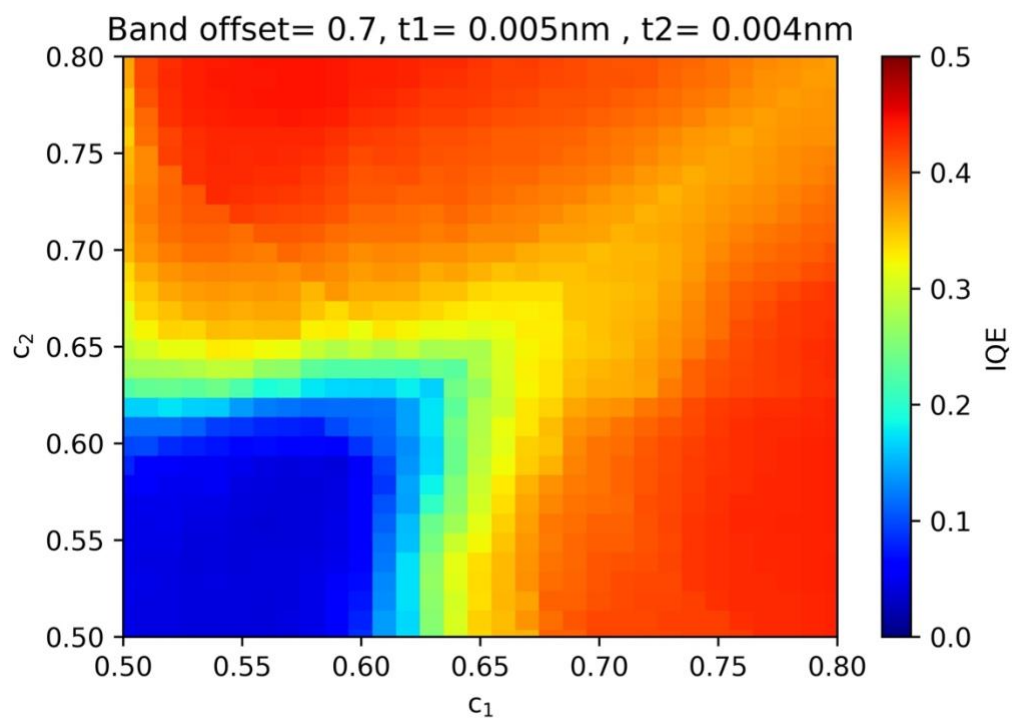

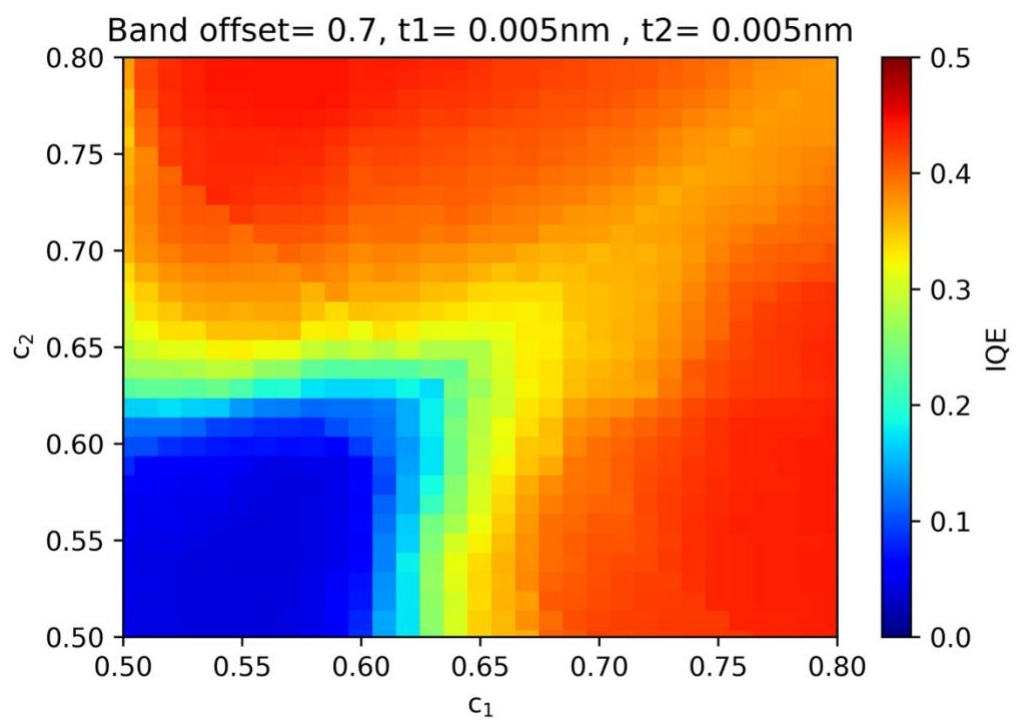

Supplement: d2tc02335k1.pdf [file d2tc02335k1.pdf]
